# Supplementary material for: Distinct ways of G:U recognition by conserved tRNA binding motifs
Source: PubMed Central journal article supplement — Proc Natl Acad Sci U S A. 2018 Jul 2;115(29):7527–32. doi: 10.1073/pnas.1807109115 (PMC6055181; doi:10.1073/pnas.1807109115), 2018-07-02
Supplement: pnas.1807109115.sapp.pdf [file pnas.1807109115.sapp.pdf]

## Supplementary Information

### Materials and methods

#### Preparation of Proteins

Plasmids for expression of full-length *E. coli* or *H. sapiens* AlaRS were constructed through PCR amplification of the desired region of the AlaRS genes with oligonucleotides containing NdeI-XhoI or NdeI-BamHI sites and ligated into pET20b to generate pET20b-*Ec*AlaRS and pET20b-*Hs*AlaRS.

Plasmids for expression of mutant *E. coli* AlaRS (N303A, N303D, D400A, D400N, N303A/D400A) and *H. sapiens* AlaRS (N317A, N317D, D416A, D416N, N317A/D416A) were constructed by the standard Quikchange mutagenesis of pET20b-*Ec*AlaRS or pET20b-*Hs*AlaRS. These proteins were expressed in *E. coli* BL21 (DE3) cells (Stratagene) and purified by Ni-NTA affinity column (Qiagen) and a Q high performance column (GE Healthcare). All proteins were dialyzed against 5 mM Tris-HCl buffer, pH 8.0, 50 mM NaCl and 2 mM DTT.

#### Preparation of tRNAs

Transfer RNAs were produced by *in vitro* transcription. 10 mL transcription reactions were carried out at 37 °C for 2 hours in buffer (40 mM Tris-HCl, pH 8.0, 25 mM NaCl, 20 mM MgCl<sub>2</sub>, 2 mM 1,8-diaminooctane, 10 mM DTT) with T7 RNA polymerase (40 U/μL), and BstNI-linearized pUC18-tRNA<sup>Ala</sup> plasmid DNA template (1 μM). The transcribed tRNAs were purified by a 8 M urea-denaturing PAGE gel or in combination with a DEAE column, annealed and concentrated. The quantity of tRNA was determined by A260.

### Active Site Titration Assays

Active site titration was performed at 25 °C in assay buffer (50 mM HEPES, pH 7.5, 20 mM KCl, 5 mM MgCl<sub>2</sub>, 2 mM DTT, 0.05 U/mL dialyzed yeast inorganic pyrophosphatase) with  $\gamma$ -<sup>32</sup>[P]-ATP (20 μM) and L-Ala (1 mM). Aliquots were quenched at different time points and spun in 96-well Multiscreen filter plates (Millipore) with activated charcoals as described previously<sup>29</sup>. The flow-through samples were counted in a MicroBeta plate reader (PerkinElmer). The amount of the released <sup>32</sup>[P]-phosphate was used to determine the concentration of active enzymes.

### Aminoacylation Assays

Aminoacylation with wild-type tRNA<sup>Ala</sup> was performed by incubating purified enzyme (5 nM) in assay buffer (50 mM HEPES, pH 7.5, 20 mM KCl, 5 mM MgCl<sub>2</sub>, 2 mM DTT, 0.05 U/mL dialyzed yeast inorganic pyrophosphatase), with 4 mM ATP, 20 μM [<sup>3</sup>H]-L-Ala and 2 μM tRNA<sup>Ala</sup> at 25 °C. For reactions with G3:C70 tRNA<sup>Ala</sup>, 500 nM enzyme and 10 μM G3:C70 tRNA<sup>Ala</sup> was used, at 37 °C. Aliquots were quenched and precipitated in 96-well Multiscreen filter plates as described previously<sup>29</sup>. After washing and elution by NaOH, samples were counted in a MicroBeta plate reader (PerkinElmer).

### Structural Modelling

*E. coli* and *H. sapiens* AlaRS structures were first modeled using Modeller 8v2 (<http://salilab.org/modeller/>) based on the available *E. coli* AlaRS catalytic domain crystal structure and the newly solved *A. fulgidus* AlaRS•tRNA<sup>Ala</sup> complex structure and on multiple sequence alignments. The initial docking of tRNA<sup>Ala</sup> to *E. coli* and *H. sapiens* AlaRS structures was determined according to the structural superimposition of the N-terminal catalytic fragments. The conformation of the *E. coli* AlaRS Mid2 subdomain and the interface residues in both *E. coli* and *H. sapiens* structures were slightly adjusted for the tRNA binding.

## Supplementary Figure 1

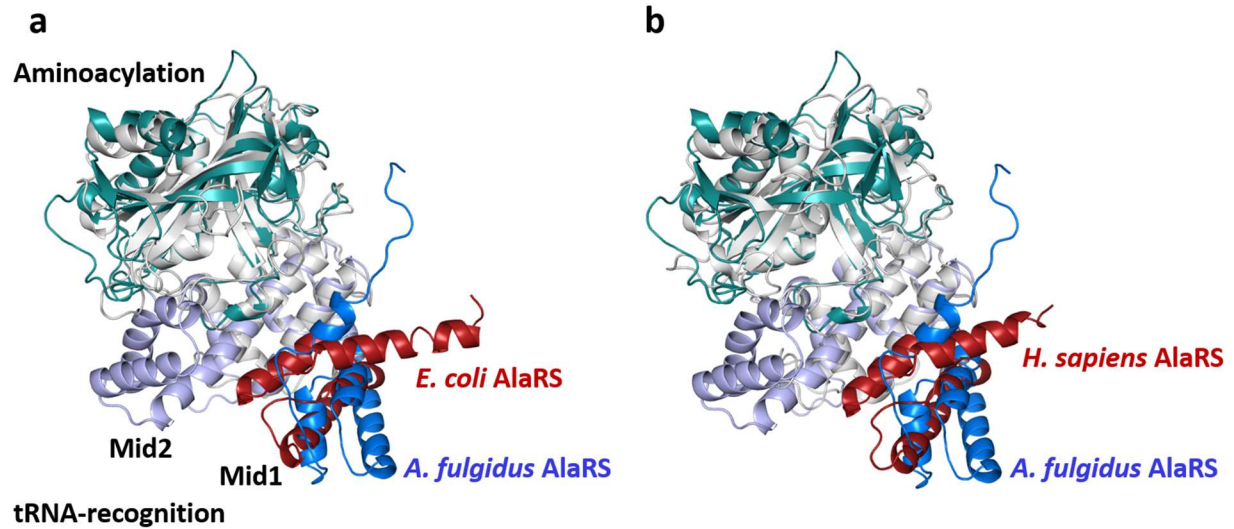

**Figure S1. Comparison of *E. coli*, *H. sapiens* and *A. fulgidus* catalytic fragment structures. a,** Superposition of the *E. coli* and *A. fulgidus* catalytic fragment structures. **b,** Superposition of the *H. sapiens* and *A. fulgidus* catalytic fragment structures. The *A. fulgidus* catalytic fragment is colored in teal, light blue, and dark blue for aminoacylation, Mid1, and Mid2 domains, respectively. *E. coli* and *H. sapiens* catalytic fragments are colored gray with the Mid2 subdomains highlighted in red. The *A. fulgidus* Mid1 domain contains a large archaea-specific insertion.

## Supplementary Figure 2

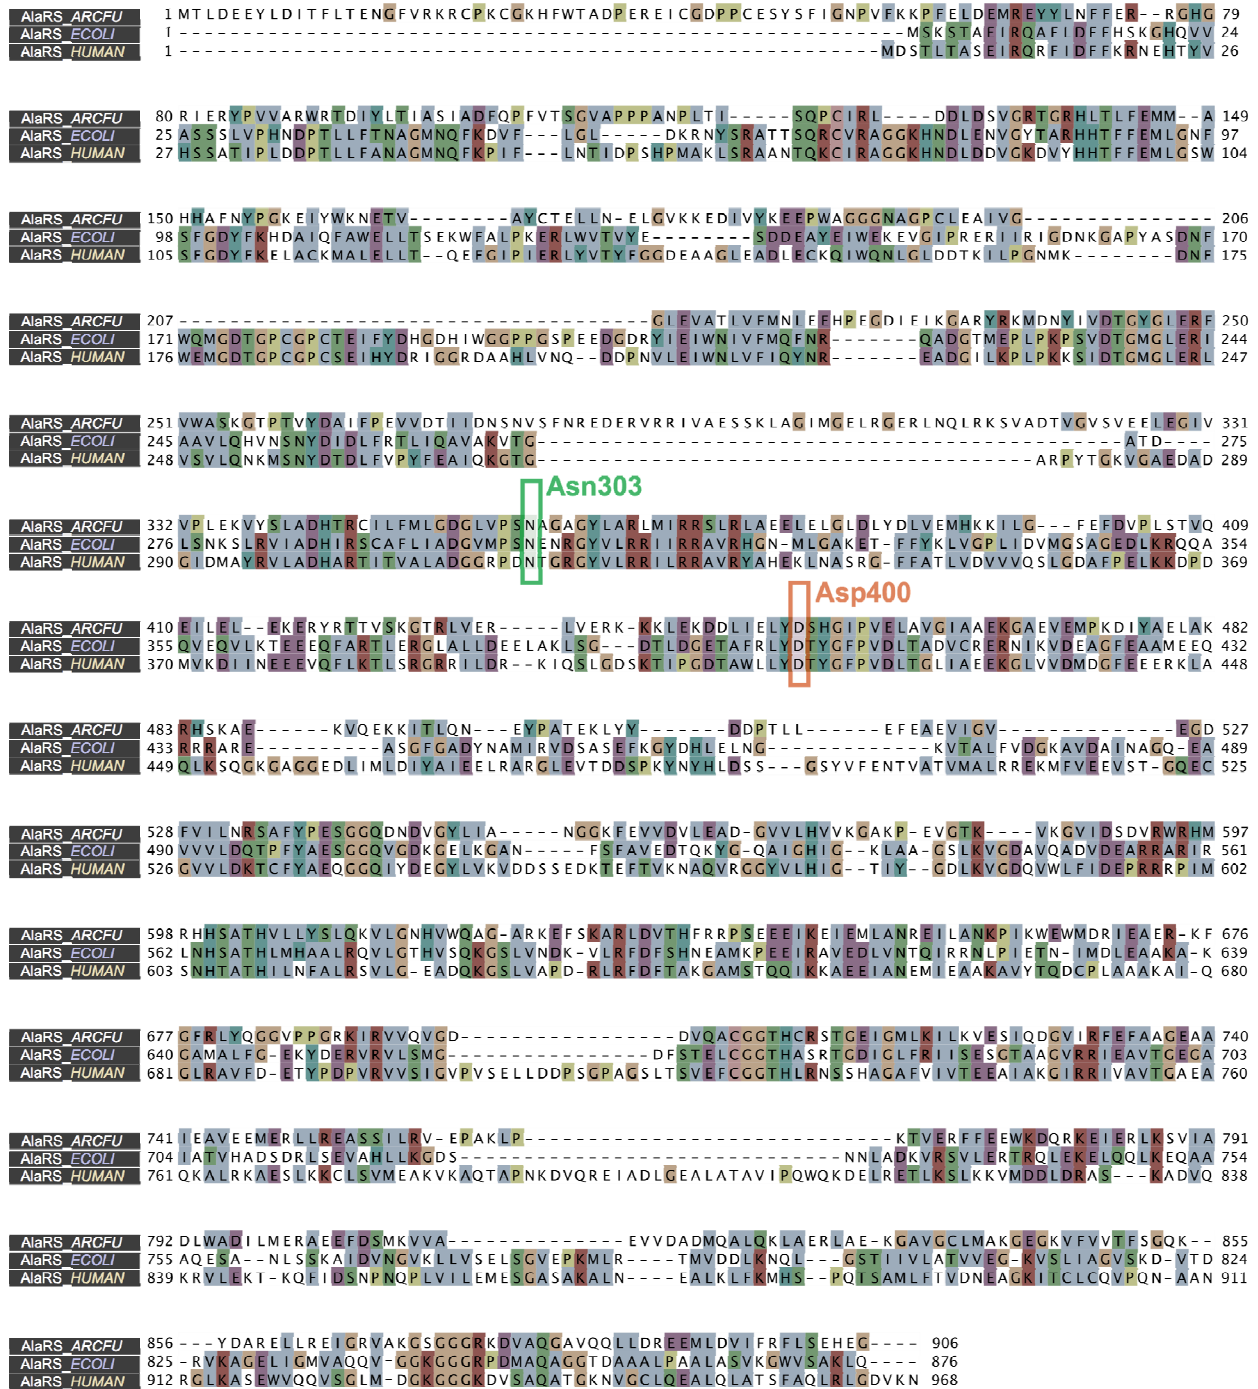

**Figure S2. Sequence alignments of full-length AlaRS from *A. fulgidus*, *E. coli* and *H. sapiens*.** The common structure consisting of an Asn and an Asp residue for the recognition of G3:U70 tRNA<sup>Ala</sup> by AlaRS is highlighted. The numbering is according to the *E. coli* AlaRS sequence.

### Supplementary Figure 3

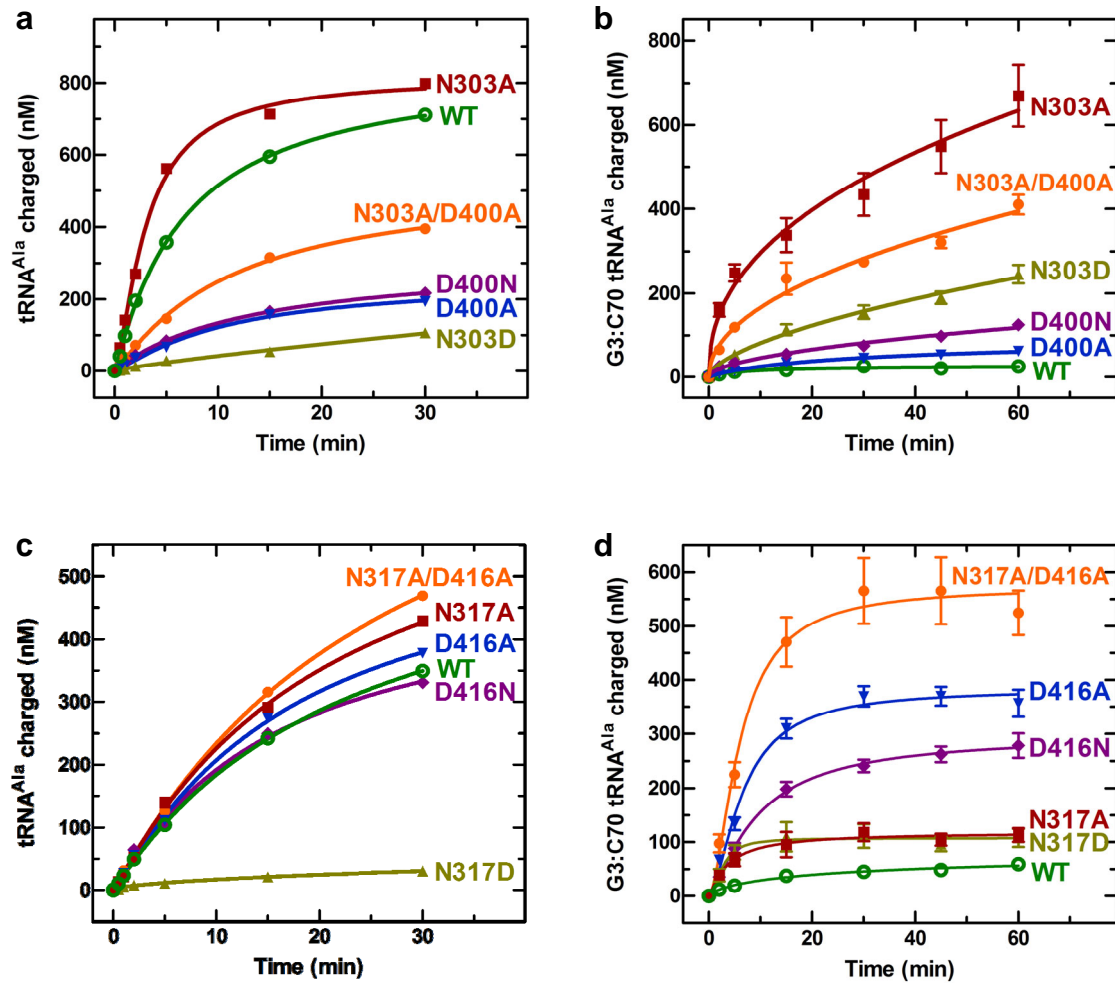

**Figure S3. Aminoacylation activities of wild-type (WT) and mutant AlaRS enzymes towards tRNA<sup>Ala</sup> and G3:C70 tRNA<sup>Ala</sup>.** a-b, Aminoacylation of G3:U70 tRNA<sup>Ala</sup> (a) and G3:C70 tRNA<sup>Ala</sup> (b) by *E. coli* AlaRS enzymes. c-d, Aminoacylation of G3:U70 tRNA<sup>Ala</sup> (c) and G3:C70 tRNA<sup>Ala</sup> (d) by human AlaRS enzymes. Aminoacylation of G3:U70 tRNA<sup>Ala</sup> was carried out with 5 nM of each enzyme at 25 °C, while that of G3:C70 tRNA<sup>Ala</sup> was carried out with 500 nM of each enzyme at 37 °C. Assays were performed at pH 7.5. Error bars represent the s.e.m. of triplicate experiments.

**Supplementary Table 1. Verified AlaRS sequences with conserved Asn + Asp structure for G:U recognition.**

|    | Accession | Entry name   | Kingdom | Gene names             | Organism                                                            | Length |
|----|-----------|--------------|---------|------------------------|---------------------------------------------------------------------|--------|
| 1  | A0B6X3    | SYA METTP    | Archaea | alaS Mthe_0657         | Methanosaeta thermophila (strain DSM 6194 / PT) (Methanothrix th)   | 913    |
| 2  | A0RX10    | SYA CENSY    | Archaea | alaS CENSYa_1254       | Cenarchaeum symbiosum                                               | 894    |
| 3  | A1RT13    | SYA PYRIL    | Archaea | alaS Pisl_0919         | Pyrobaculum islandicum (strain DSM 4184 / JCM 9189)                 | 892    |
| 4  | A1RWQ1    | SYA THEPD    | Archaea | alaS Tpen_0221         | Thermofilum pendens (strain Hrk 5)                                  | 907    |
| 5  | A2BN65    | SYA HYPBU    | Archaea | alaS Hbut_1607         | Hyperthermus butylicus (strain DSM 5456 / JCM 9403)                 | 921    |
| 6  | A2ST90    | SYA METLZ    | Archaea | alaS Mlab_1380         | Methanocorpusculum labreanum (strain ATCC 43576 / DSM 4855 /        | 913    |
| 7  | A3CVP2    | SYA METMJ    | Archaea | alaS Memar_1513        | Methanoculleus marisnigri (strain ATCC 35101 / DSM 1498 / JR1)      | 915    |
| 8  | A3DNI3    | SYA STAMF    | Archaea | alaS Smar_1097         | Staphylothermus marinus (strain ATCC 43588 / DSM 3639 / F1)         | 909    |
| 9  | A3MXP1    | SYA PYRCJ    | Archaea | alaS Pcal_1993         | Pyrobaculum calidifontis (strain JCM 11548 / VA1)                   | 896    |
| 10 | A4FZA5    | SYA METM5    | Archaea | alaS MmarC5_1241       | Methanococcus maripaludis (strain C5 / ATCC BAA-1333)               | 892    |
| 11 | A4WN07    | SYA PYRAR    | Archaea | alaS Pars_2228         | Pyrobaculum arsenaticum (strain DSM 13514 / JCM 11321)              | 892    |
| 12 | A5UKU6    | SYA METS3    | Archaea | alaS Msm_0619          | Methanobrevibacter smithii (strain PS / ATCC 35061 / DSM 861)       | 897    |
| 13 | A6US09    | SYA METVS    | Archaea | alaS Mevan_1384        | Methanococcus vannielii (strain SB / ATCC 35089 / DSM 1224)         | 892    |
| 14 | A6UUN3    | SYA META3    | Archaea | alaS Maeo_0621         | Methanococcus aeolicus (strain Nankai-3 / ATCC BAA-1280)            | 910    |
| 15 | A6VJ32    | SYA METM7    | Archaea | alaS MmarC7_1395       | Methanococcus maripaludis (strain C7 / ATCC BAA-1331)               | 892    |
| 16 | A7I7S4    | SYA METB6    | Archaea | alaS Mboo_1267         | Methanoregula boonei (strain 6A8)                                   | 914    |
| 17 | A8A8X8    | SYA IGNH4    | Archaea | alaS Igni_0196         | Ignicoccus hospitalis (strain KIN4/I / DSM 18386 / JCM 14125)       | 901    |
| 18 | A8MBI2    | SYA CALMQ    | Archaea | alaS Cmaq_1898         | Caldivirga maquilingensis (strain DSMZ 13496 / IC-167)              | 899    |
| 19 | A9A565    | SYA NITMS    | Archaea | alaS Nmar_0368         | Nitrosopumilus maritimus (strain SCM1)                              | 889    |
| 20 | A9A6Q2    | SYA METM6    | Archaea | alaS MmarC6_0513       | Methanococcus maripaludis (strain C6 / ATCC BAA-1332)               | 892    |
| 21 | B0R7I0    | SYA HALS3    | Archaea | alaS OE4198F           | Halobacterium salinarum (strain ATCC 29341 / DSM 671 / R1)          | 929    |
| 22 | B1L762    | SYA KORCO    | Archaea | alaS Kcr_1545          | Korarchaeum cryptofilum (strain OPF8)                               | 895    |
| 23 | B1YDH4    | SYA THENV    | Archaea | alaS Tneu_0900         | Thermoproteus neutrophilus (strain DSM 2338 / JCM 9278 / V24St)     | 892    |
| 24 | B5IBA6    | B5IBA6 ACIB4 | Archaea | alaS2 ABOONEI_543      | Aciduliprofundum boonei (strain DSM 19572 / T469)                   | 882    |
| 25 | B5ICY4    | B5ICY4 ACIB4 | Archaea | alaS1 ABOO_1447 ABOONE | Aciduliprofundum boonei (strain DSM 19572 / T469)                   | 882    |
| 26 | B8D5P5    | B8D5P5 DESK1 | Archaea | alaS DKAM_1100         | Desulfurococcus kamchatkensis (strain 1221n / DSM 18924)            | 908    |
| 27 | B8GHL6    | B8GHL6 METPE | Archaea | alaS Mpal_1287         | Methanosphaerula palustris (strain ATCC BAA-1556 / DSM 19958 /      | 913    |
| 28 | B9AGG4    | B9AGG4 METSM | Archaea | alaS METSMIALI_01468   | Methanobrevibacter smithii DSM 2375                                 | 897    |
| 29 | B9LUG4    | SYA HALLT    | Archaea | alaS Hlac_0719         | Halorubrum lacusprofundi (strain ATCC 49239 / DSM 5036 / JCM 8)     | 926    |
| 30 | C3MR87    | SYA SULIL    | Archaea | alaS LS215_1905        | Sulfolobus islandicus (strain L.S.2.15 / Lassen #1)                 | 900    |
| 31 | C3MXH6    | SYA SULIM    | Archaea | alaS M1425_1765        | Sulfolobus islandicus (strain M.14.25 / Kamchatka #1)               | 900    |
| 32 | C3MZC2    | SYA SULIA    | Archaea | alaS M1627_1883        | Sulfolobus islandicus (strain M.16.27)                              | 900    |
| 33 | C3N7E3    | SYA SULIY    | Archaea | alaS YG5714_1881       | Sulfolobus islandicus (strain Y.G.57.14 / Yellowstone #1)           | 900    |
| 34 | C3NG91    | SYA SULIN    | Archaea | alaS YN1551_1044       | Sulfolobus islandicus (strain Y.N.15.51 / Yellowstone #2)           | 900    |
| 35 | C4KIK1    | SYA SULIK    | Archaea | alaS M164_1812         | Sulfolobus islandicus (strain M.16.4 / Kamchatka #3)                | 900    |
| 36 | C7NT23    | C7NT23 HALUD | Archaea | alaS Huta_1929         | Halorhabdus utahensis (strain DSM 12940 / JCM 11049 / AX-2)         | 926    |
| 37 | C7P221    | C7P221 HALMD | Archaea | alaS Hmuk_1124         | Halomicrobium mukohataei (strain ATCC 700874 / DSM 12286 / JC       | 924    |
| 38 | C7P7U1    | C7P7U1 METFA | Archaea | alaS Mefer_0805        | Methanocaldococcus fervens (strain DSM 4213 / JCM 157852 / AG8      | 892    |
| 39 | C9RF77    | C9RF77 METVM | Archaea | alaS Metvu_0364        | Methanocaldococcus vulcanius (strain ATCC 700851 / DSM 12094 /      | 895    |
| 40 | D0KS30    | D0KS30 SULS9 | Archaea | alaS Ssol_1313         | Sulfolobus solfataricus (strain 98/2)                               | 900    |
| 41 | D1JFB4    | D1JFB4 9ARCH | Archaea | alaS BSM_06990         | Uncultured archaeon                                                 | 919    |
| 42 | D2PDA7    | D2PDA7 SULID | Archaea | alaS LD85_2022         | Sulfolobus islandicus (strain L.D.8.5 / Lassen #2)                  | 900    |
| 43 | D2RFS9    | D2RFS9 ARCPA | Archaea | alaS Arcpr_0078        | Archaeoglobus profundus (strain DSM 5631 / JCM 9629 / NBRC 10)      | 902    |
| 44 | D2RSW0    | D2RSW0 HALTV | Archaea | alaS Htur_0033         | Haloterrigena turkmenica (strain ATCC 51198 / DSM 5511 / NCIMB      | 925    |
| 45 | D2ZN69    | D2ZN69 METSM | Archaea | alaS METSMIF1_02273    | Methanobrevibacter smithii DSM 2374                                 | 897    |
| 46 | D3E160    | D3E160 METRM | Archaea | alaS mru_0492          | Methanobrevibacter ruminantium (strain ATCC 35063 / DSM 1093 /      | 910    |
| 47 | D3RX43    | D3RX43 FERPA | Archaea | alaS Ferp_0888         | Ferroglobus placidus (strain DSM 10642 / AEDII2DO)                  | 901    |
| 48 | D3S7L8    | D3S7L8 METSF | Archaea | alaS MFS40622_0332     | Methanocaldococcus sp. (strain FS406-22)                            | 892    |
| 49 | D3SV71    | D3SV71 NATMM | Archaea | alaS Nmag_1908         | Natrialba magadii (strain ATCC 43099 / DSM 3394 / NCIMB 2190 /      | 926    |
| 50 | D4GZF1    | D4GZF1 HALVD | Archaea | alaS1 alaS HVO_0206    | Haloferax volcanii (strain ATCC 29605 / DSM 3757 / IFO 14742 / N    | 922    |
| 51 | D5E9Q1    | D5E9Q1 METMS | Archaea | alaS Mmah_0370         | Methanohalophilus mahii (strain ATCC 35705 / DSM 5219 / SLP)        | 924    |
| 52 | D5U265    | D5U265 THEAM | Archaea | alaS Tagg_0943         | Thermosphaera aggregans (strain DSM 11486 / M11TL)                  | 908    |
| 53 | D5VSD6    | D5VSD6 METIM | Archaea | alaS Metin_0824        | Methanocaldococcus infernus (strain DSM 11812 / JCM 15783 / ME      | 873    |
| 54 | D7D9M2    | D7D9M2 STAHD | Archaea | alaS Shell_1379        | Staphylothermus hellenicus (strain DSM 12710 / JCM 10830 / BK2)     | 909    |
| 55 | D7DR36    | D7DR36 METV3 | Archaea | alaS Mvol_1658         | Methanococcus voltae (strain ATCC BAA-1334 / A3)                    | 936    |
| 56 | D7E9B0    | D7E9B0 METEZ | Archaea | alaS Metev_1322        | Methanohalobium evestigatum (strain DSM 3721 / OCM 161 / Z-73       | 922    |
| 57 | D8J547    | D8J547 HALJB | Archaea | alaS HacjB3_01175      | Halalkalicoccus jeotgali (strain DSM 18796 / CECT 7217 / JCM 1458   | 921    |
| 58 | D9PUH2    | D9PUH2 METTM | Archaea | alaS MTBMA_c02620      | Methanothermobacter marburgensis (strain DSM 2133 / 14651 / N       | 898    |
| 59 | D9Q015    | D9Q015 ACIS3 | Archaea | alaS ASAC_0246         | Acidilobus saccharovorans (strain DSM 16705 / VKM B-2471 / 345-     | 913    |
| 60 | E0SP23    | E0SP23 IGNAA | Archaea | alaS Igag_1163         | Ignisphaera aggregans (strain DSM 17230 / JCM 13409 / AQ1.S1)       | 914    |
| 61 | E1K3M1    | E1K3M1 9EURY | Archaea | alaS MetokDRAFT_0311   | Methanothermococcus okinawensis IH1                                 | 905    |
| 62 | E1QRQ6    | E1QRQ6 VULDI | Archaea | alaS Vdis_0016         | Vulcanisaeta distributa (strain DSM 14429 / JCM 11212 / NBRC 10)    | 918    |
| 63 | E1RGR2    | E1RGR2 METP4 | Archaea | alaS Mpet_1600         | Methanoplanus petrolearius (strain DSM 11571 / OCM 486 / SEBR 4     | 912    |
| 64 | E3GXBB    | E3GXBB METFV | Archaea | alaS Mfer_0147         | Methanothermobacter fervidus (strain ATCC 43054 / DSM 2088 / JCM 1) | 908    |
| 65 | E4NRJ7    | E4NRJ7 HALBP | Archaea | alaS Hbor_00600        | Halogeometricum borinquense (strain ATCC 700274 / DSM 11551 /       | 922    |
| 66 | E6N4E7    | E6N4E7 9ARCH | Archaea | CSUB_C0158 HGMM_F42C   | Candidatus Caldiarchaeum subterraneum                               | 909    |
| 67 | E6N9W2    | E6N9W2 9ARCH | Archaea | HGMM_F43G04C19         | Candidatus Caldiarchaeum subterraneum                               | 865    |
| 68 | O27718    | SYA METHH    | Archaea | alaS MTH_1683          | Methanobacterium thermoautotrophicum                                | 898    |
| 69 | O28029    | SYA ARCFU    | Archaea | alaS AF_2255           | Archaeoglobus fulgidus                                              | 906    |
| 70 | P35029    | SYA SULAC    | Archaea | alaS Saci_1455         | Sulfolobus acidocaldarius                                           | 907    |
| 71 | P61710    | SYA METMP    | Archaea | alaS MMP0397           | Methanococcus maripaludis                                           | 892    |
| 72 | P96041    | SYA SULSO    | Archaea | alaS SSO0341           | Sulfolobus solfataricus                                             | 900    |
| 73 | Q0W5Q9    | SYA UNCMA    | Archaea | alaS UNCMA_19110 RCIX9 | Uncultured methanogenic archaeon RC-I                               | 875    |
| 74 | Q12U25    | SYA METBU    | Archaea | alaS Mbur_2186         | Methanococcoides burtonii (strain DSM 6242)                         | 923    |
| 75 | Q18E76    | SYA HALWD    | Archaea | alaS HQ3670A           | Haloquadratum walsbyi (strain DSM 16790)                            | 923    |
| 76 | Q2FQD6    | SYA METHJ    | Archaea | alaS Mhun_0039         | Methanospirillum hungatei (strain JF-1 / DSM 864)                   | 916    |



|     |        |              |          |                         |                                                                                  |     |
|-----|--------|--------------|----------|-------------------------|----------------------------------------------------------------------------------|-----|
| 77  | Q2NEW4 | SYA METST    | Archaea  | alaS Msp_1262           | Methanosphaera stadtmanae (strain DSM 3091)                                      | 903 |
| 78  | Q3ITT7 | SYA NATPD    | Archaea  | alaS NP0710A            | Natronomonas pharaonis (strain DSM 2160 / ATCC 35678)                            | 932 |
| 78  | Q46CS0 | SYA METBF    | Archaea  | alaS Mbar_A1361         | Methanosarcina barkeri (strain Fusaro / DSM 804)                                 | 923 |
| 79  | Q57984 | SYA METJA    | Archaea  | alaS MJ0564             | Methanocaldococcus jannaschii (Methanococcus jannaschii)                         | 892 |
| 80  | Q5UZE6 | SYA HALMA    | Archaea  | alaS rrrAC2561          | Haloarcula marismortui (Halobacterium marismortui)                               | 927 |
| 81  | Q6L1Z4 | SYA PICTO    | Archaea  | alaS PTO0423            | Picrophilus torridus (strain ATCC 700027 / DSM 9790 / JCM 10055)                 | 870 |
| 82  | Q8PWU0 | SYA METMA    | Archaea  | alaS MM_1486            | Methanosarcina mazei (Methanosarcina frisia)                                     | 926 |
| 83  | Q8TU79 | SYA METAC    | Archaea  | alaS MA_0194            | Methanosarcina acetivorans                                                       | 925 |
| 84  | Q8TWW1 | SYA METKA    | Archaea  | alaS MK0900             | Methanopyrus kandleri                                                            | 915 |
| 85  | Q8ZSV6 | SYA PYRAE    | Archaea  | alaS PAE3565            | Pyrobaculum aerophilum (strain ATCC 51768 / IM2 / DSM 7523 / JCM 10014)          | 892 |
| 86  | Q971J4 | SYA SULTO    | Archaea  | alaS ST1364             | Sulfolobus tokodaii (strain DSM 16993 / JCM 10545 / NBRC 100140)                 | 904 |
| 87  | Q97AH7 | SYA THEVO    | Archaea  | alaS TV0833 TVG0850702  | Thermoplasma volcanium (strain ATCC 51530 / DSM 4299 / IFO 15701)                | 876 |
| 86  | Q9HJW4 | SYA THEAC    | Archaea  | alaS Ta0849             | Thermoplasma acidophilum (strain ATCC 25905 / DSM 1728 / JCM 10014)              | 871 |
| 87  | Q9HN24 | SYA HALSA    | Archaea  | alaS VNG_2283G          | Halobacterium salinarium (Halobacterium halobium)                                | 929 |
| 88  | Q9Y9X3 | SYA AERPE    | Archaea  | alaS APE_2166           | Aeropyrum pernix                                                                 | 900 |
| 89  | A0AIV3 | SYA LISW6    | Bacteria | alaS lwe1517            | Listeria welshimeri serovar 6b (strain ATCC 35897 / DSM 20650 / S10)             | 879 |
| 90  | A0JX88 | SYA ARTS2    | Bacteria | alaS Arth_2278          | Arthrobacter sp. (strain FB24)                                                   | 892 |
| 91  | A0K6N4 | SYA BURCH    | Bacteria | alaS Bcen2424_1409      | Burkholderia cenocepacia (strain HI2424)                                         | 874 |
| 92  | A0KPG1 | SYA AERHH    | Bacteria | alaS AHA_3714           | Aeromonas hydrophila subsp. hydrophila (strain ATCC 7966 / NCIB 10240)           | 874 |
| 93  | A0KU94 | SYA SHESA    | Bacteria | alaS Shewana3_1128      | Shewanella sp. (strain ANA-3)                                                    | 874 |
| 94  | A0L3J9 | SYA MAGSM    | Bacteria | alaS Mmc1_0013          | Magnetococcus sp. (strain MC-1)                                                  | 878 |
| 95  | A0LLA3 | SYA SYNFM    | Bacteria | alaS Sfum_2527          | Syntrophobacter fumaroxidans (strain DSM 10017 / MPOB)                           | 885 |
| 96  | A0LUJ2 | SYA ACIC1    | Bacteria | alaS Acel_1330          | Acidothermus cellulolyticus (strain ATCC 43068 / 11B)                            | 886 |
| 97  | A0LX3  | SYA GRAFK    | Bacteria | alaS GFO_0230           | Gramella forsetii (strain KT0803)                                                | 871 |
| 98  | A0NP87 | A0NP87_9RHOB | Bacteria | SIAM614_18034           | Labrenzia aggregata IAM 12614                                                    | 885 |
| 99  | A0PPG6 | SYA MYCUA    | Bacteria | alaS MUL_1754           | Mycobacterium ulcerans (strain Agy99)                                            | 901 |
| 100 | A0Q151 | SYA CLONN    | Bacteria | alaS NT01CX_2280        | Clostridium novyi (strain NT)                                                    | 879 |
| 101 | A0Q604 | SYA FRATN    | Bacteria | alaS FTN_0778           | Francisella tularensis subsp. novicida (strain U112)                             | 865 |
| 102 | A0QI75 | SYA MYCA1    | Bacteria | alaS MAV_3431           | Mycobacterium avium (strain 104)                                                 | 900 |
| 103 | A0QWQ4 | SYA MYCS2    | Bacteria | alaS MSMEG_3025         | Mycobacterium smegmatis (strain ATCC 700084 / mc(2)155)                          | 896 |
| 104 | A0RJ00 | SYA BACAH    | Bacteria | alaS BALH_3972          | Bacillus thuringiensis (strain AI Hakam)                                         | 880 |
| 105 | A0Y5U7 | A0Y5U7_9GAMM | Bacteria | ATW7_11666              | Alteromonades bacterium TW-7                                                     | 866 |
| 106 | A0YHT3 | A0YHT3_9GAMM | Bacteria | alaS GP2143_00065       | Marine gamma proteobacterium HTCC2143                                            | 874 |
| 107 | A0YQ44 | A0YQ44_LYNBP | Bacteria | L8106_26902             | Lyngbya sp. (strain PCC 8106) (Lyngbya aestuarii (strain CCY9616))               | 891 |
| 108 | A0Z875 | A0Z875_9GAMM | Bacteria | MGP2080_08254           | Marine gamma proteobacterium HTCC2080                                            | 866 |
| 109 | A0ZM23 | A0ZM23_NODSP | Bacteria | N9414_11429             | Nodularia spumigena CCY9414                                                      | 880 |
| 110 | A1A198 | SYA BIFAA    | Bacteria | alaS BAD_0700           | Bifidobacterium adolescentis (strain ATCC 15703 / DSM 20083)                     | 892 |
| 111 | A1AEN7 | SYA ECOK1    | Bacteria | alaS Ecok1_26330 APECO1 | Escherichia coli O1:K1 / APEC                                                    | 876 |
| 112 | A1ATU9 | SYA PELPD    | Bacteria | alaS Ppro_3176          | Pelobacter propionicus (strain DSM 2379)                                         | 878 |
| 113 | A1AXE0 | SYA RUTMC    | Bacteria | alaS Rmag_0882          | Ruthia magnifica subsp. Calyptogena magnifica                                    | 865 |
| 114 | A1AZL6 | SYA PARDP    | Bacteria | alaS Pden_0598          | Paracoccus denitrificans (strain Pd 1222)                                        | 885 |
| 115 | A1BD33 | SYA CHLPD    | Bacteria | alaS Cpha266_0243       | Chlorobium phaeobacteroides (strain DSM 266)                                     | 888 |
| 116 | A1EPU8 | A1EPU8_VIBCH | Bacteria | alaS VCV52_0511         | Vibrio cholerae V52                                                              | 860 |
| 117 | A1F830 | A1F830_VIBCH | Bacteria | alaS VC274080_0641      | Vibrio cholerae 2740-80                                                          | 860 |
| 118 | A1HU97 | A1HU97_9FIRM | Bacteria | TcarDRAFT_0041          | Thermosinus carboxydvorans Nor1                                                  | 869 |
| 119 | A1JK09 | SYA YZER8    | Bacteria | alaS YE0834             | Yersinia enterocolitica serotype O:8 / biotype 1B (strain 8081)                  | 875 |
| 120 | A1K991 | SYA AZOSB    | Bacteria | alaS azo2780            | Azoarcus sp. (strain BH72)                                                       | 885 |
| 121 | A1KLQ3 | SYA MYCBP    | Bacteria | alaS BCG_2578c          | Mycobacterium bovis (strain BCG / Pasteur 1173P2)                                | 904 |
| 122 | A1KV20 | SYA NEIMF    | Bacteria | alaS NMC1518            | Neisseria meningitidis serogroup C / serotype 2a (strain ATCC 700518)            | 874 |
| 122 | A1QZ14 | A1QZ14_BORT9 | Bacteria | BT0220                  | Borrelia turicatae (strain 91E135)                                               | 593 |
| 123 | A1R709 | SYA ARTAT    | Bacteria | alaS AAur_2281          | Arthrobacter aurescens (strain TC1)                                              | 892 |
| 124 | A1RHG5 | SYA SHESW    | Bacteria | alaS Sputw3181_1267     | Shewanella sp. (strain W3-18-1)                                                  | 874 |
| 125 | A1S4E9 | SYA SHEAM    | Bacteria | alaS Sama_1048          | Shewanella amazonensis (strain ATCC BAA-1098 / SB2B)                             | 873 |
| 126 | A1SJC7 | SYA NOCSJ    | Bacteria | alaS Noca_2407          | Nocardioides sp. (strain BAA-499 / JS614)                                        | 896 |
| 127 | A1T001 | SYA PSYIN    | Bacteria | alaS Ping_3380          | Psychromonas ingrahamii (strain 37)                                              | 867 |
| 128 | A1T8E8 | SYA MYCVP    | Bacteria | alaS Mvan_2640          | Mycobacterium vanbaalenii (strain DSM 7251 / PYR-1)                              | 898 |
| 129 | A1TRL4 | SYA ACIAC    | Bacteria | alaS Aave_3035          | Acidovorax avenae subsp. citrullii (strain AAC00-1)                              | 948 |
| 130 | A1TZ92 | SYA MARAV    | Bacteria | alaS Maqu_0965          | Marinobacter aquaeolei (strain ATCC 700491 / DSM 11845 / VT8) (strain DSM 11845) | 876 |
| 131 | A1UFI3 | SYA MYCSK    | Bacteria | alaS Mkms_2393          | Mycobacterium sp. (strain KMS)                                                   | 897 |
| 132 | A1USS4 | SYA BARBK    | Bacteria | alaS BARBAK583_0728     | Bartonella bacilliformis (strain ATCC 35685 / KC583)                             | 886 |
| 133 | A1V3F2 | SYA BURMS    | Bacteria | alaS BMASAVP1_A1423     | Burkholderia mallei (strain SAVP1)                                               | 874 |
| 134 | A1VEQ6 | SYA DESVV    | Bacteria | alaS Dvul_1906          | Desulfovibrio vulgaris subsp. vulgaris (strain DP4)                              | 879 |
| 135 | A1VQK2 | SYA POLNA    | Bacteria | alaS Pnap_2628          | Polaromonas naphthalenivorans (strain CJ2)                                       | 874 |
| 136 | A1W7D0 | SYA ACISJ    | Bacteria | alaS Ajs_1979           | Acidovorax sp. (strain JS42)                                                     | 874 |
| 137 | A1ZYX1 | A1ZYX1_9BACT | Bacteria | M23134_01747            | Microscilla marina ATCC 23134                                                    | 883 |
| 138 | A2BNH2 | SYA PROMS    | Bacteria | alaS A9601_00451        | Prochlorococcus marinus (strain AS9601)                                          | 886 |
| 139 | A2BTZ9 | SYA PROM5    | Bacteria | alaS P9515_00511        | Prochlorococcus marinus (strain MIT 9515)                                        | 886 |
| 140 | A2BZG2 | SYA PROM1    | Bacteria | alaS NATL1_00581        | Prochlorococcus marinus (strain NATL1A)                                          | 886 |
| 141 | A2CDK7 | SYA PROM3    | Bacteria | alaS P9303_28371        | Prochlorococcus marinus (strain MIT 9303)                                        | 892 |
| 142 | A2PD12 | A2PD12_VIBCH | Bacteria | alaS A55_0561           | Vibrio cholerae 1587                                                             | 593 |
| 143 | A2PUQ0 | A2PUQ0_VIBCH | Bacteria | alaS A51_B0525          | Vibrio cholerae MZO-3                                                            | 860 |
| 144 | A2RDY3 | SYA STRPG    | Bacteria | alaS Spym50726          | Streptococcus pyogenes serotype M5 (strain Manfredo)                             | 872 |
| 145 | A2RME6 | SYA LACLAM   | Bacteria | alaS limg_1906          | Lactococcus lactis subsp. cremoris (strain MG1363)                               | 872 |
| 146 | A2S3D4 | SYA BURM9    | Bacteria | alaS BMA10229_A0455     | Burkholderia mallei (strain NCTC 10229)                                          | 874 |
| 147 | A2SI90 | SYA METPP    | Bacteria | alaS Mpe_A2323          | Methylobium petroleiphilum (strain PM1)                                          | 875 |
| 146 | A2TU46 | A2TU46_9FLAO | Bacteria | MED134_11636            | Dokdonia donghaensis MED134                                                      | 870 |
| 147 | A2TZ13 | A2TZ13_9FLAO | Bacteria | MED152_07550            | Polaribacter sp. MED152                                                          | 873 |

|     |        |              |          |                         |                                                                    |     |
|-----|--------|--------------|----------|-------------------------|--------------------------------------------------------------------|-----|
| 148 | A2VR13 | A2VR13_9BURK | Bacteria | BCPG_00382              | Burkholderia cenocepacia PC184                                     | 897 |
| 149 | A2WAW1 | A2WAW1_9BURK | Bacteria | BDAG_01855              | Burkholderia dolosa AU0158                                         | 914 |
| 150 | A3CLY3 | SYA_STRSV    | Bacteria | alaS SSA_0756           | Streptococcus sanguinis (strain SK36)                              | 872 |
| 151 | A3D783 | SYA_SHEB5    | Bacteria | alaS Sbal_3115          | Shewanella baltica (strain OS155 / ATCC BAA-1091)                  | 874 |
| 152 | A3ENA9 | A3ENA9_VIBCH | Bacteria | alaS VCV51_0351         | Vibrio cholerae V51                                                | 860 |
| 153 | A3EWF8 | A3EWF8_9BACT | Bacteria | UBAL2_80270014          | Leptospirillum rubarum                                             | 891 |
| 154 | A3GQD1 | A3GQD1_VIBCH | Bacteria | alaS A5C_0557           | Vibrio cholerae NCTC 8457                                          | 860 |
| 155 | A3H478 | A3H478_VIBCH | Bacteria | alaS A5E_0608_VCE_00038 | Vibrio cholerae B33                                                | 860 |
| 156 | A3HTM2 | A3HTM2_9BACT | Bacteria | ALPR1_13255             | Algoriphagus sp. PR1                                               | 874 |
| 157 | A3IFB4 | A3IFB4_9BACT | Bacteria | alaS BB14905_09530      | Bacillus sp. B14905                                                | 742 |
| 158 | A3IW40 | A3IW40_9CHRO | Bacteria | CY0110_08771            | Cyanotheca sp. CCY0110                                             | 879 |
| 159 | A3J4Q1 | A3J4Q1_9FLAO | Bacteria | FBBAL38_08050           | Flavobacteria bacterium BAL38                                      | 878 |
| 160 | A3JGQ5 | A3JGQ5_9ALTE | Bacteria | MELB17_15711            | Marinobacter sp. ELB17                                             | 876 |
| 161 | A3JSX2 | A3JSX2_9RHOB | Bacteria | alaS RB2150_02669       | Rhodobacteraceae bacterium HTCC2150                                | 886 |
| 162 | A3K230 | A3K230_9RHOB | Bacteria | alaS SSE37_05000        | Sagittula stellata E-37                                            | 890 |
| 163 | A3M3W2 | SYA_ACIBT    | Bacteria | alaS A1S_1176           | Acinetobacter baumannii (strain ATCC 17978 / NCDC KC 755)          | 878 |
| 164 | A3MJ36 | SYA_BURM7    | Bacteria | alaS BMA10247_0705      | Burkholderia mallei (strain NCTC 10247)                            | 874 |
| 165 | A3N018 | SYA_ACTP2    | Bacteria | alaS APL_0654           | Actinobacillus pleuropneumoniae serotype 5b (strain L20)           | 874 |
| 166 | A3N8K7 | SYA_BURP6    | Bacteria | alaS BURPS668_1637      | Burkholderia pseudomallei (strain 668)                             | 874 |
| 167 | A3NUB0 | SYA_BURP0    | Bacteria | alaS BURPS1106A_1660    | Burkholderia pseudomallei (strain 1106a)                           | 874 |
| 168 | A3PA95 | SYA_PROMO    | Bacteria | alaS P9301_00471        | Prochlorococcus marinus (strain MIT 9301)                          | 886 |
| 169 | A3PLJ1 | SYA_RHOS1    | Bacteria | alaS Rsph17029_2104     | Rhodobacter sphaeroides (strain ATCC 17029 / ATH 2.4.9)            | 883 |
| 170 | A3PZ44 | SYA_MYCSJ    | Bacteria | alaS Mjls_2387          | Mycobacterium sp. (strain JLS)                                     | 897 |
| 171 | A3QC89 | SYA_SHELP    | Bacteria | alaS Shew_1217          | Shewanella loihica (strain ATCC BAA-1088 / PV-4)                   | 874 |
| 172 | A3RUL5 | A3RUL5_RALSO | Bacteria | RRSL_02374              | Ralstonia solanacearum UW551                                       | 880 |
| 173 | A3SGP8 | A3SGP8_9RHOB | Bacteria | EE36_14248              | Sulfitobacter sp. EE-36                                            | 886 |
| 174 | A3SNY7 | A3SNY7_9RHOB | Bacteria | ISM_14965               | Roseovarius nubinihibens ISM                                       | 888 |
| 174 | A3T117 | A3T117_9RHOB | Bacteria | NAS141_19374            | Sulfitobacter sp. NAS-14.1                                         | 886 |
| 175 | A3TLT6 | A3TLT6_9MICO | Bacteria | JNB_04195               | Janibacter sp. HTCC2649                                            | 897 |
| 176 | A3TWT1 | A3TWT1_9RHOB | Bacteria | OB2597_01687            | Oceanicola batsensis HTCC2597                                      | 892 |
| 177 | A3U723 | A3U723_CROAH | Bacteria | CA2559_04755            | Croceibacter atlanticus (strain ATCC BAA-628 / HTCC2559 / KCTC 1   | 870 |
| 178 | A3UDY1 | A3UDY1_9RHOB | Bacteria | OA2633_04771            | Oceanicaulis sp. HTCC2633                                          | 886 |
| 179 | A3UV43 | A3UV43_VIBSP | Bacteria | V12B01_08195            | Vibrio splendidus 12B01                                            | 860 |
| 180 | A3V9G2 | A3V9G2_9RHOB | Bacteria | SKA53_03344             | Loktanella vestfoldensis SKA53                                     | 884 |
| 181 | A3VJG4 | A3VJG4_9RHOB | Bacteria | RB2654_03899            | Maritimibacter alkaliphilus HTCC2654                               | 882 |
| 182 | A3VX41 | A3VX41_9RHOB | Bacteria | ROS217_20882            | Roseovarius sp. 217                                                | 892 |
| 183 | A3WBB9 | A3WBB9_9SPHN | Bacteria | NAP1_06990              | Erythrobacter sp. NAP1                                             | 887 |
| 184 | A3WNA0 | A3WNA0_9GAMM | Bacteria | OS145_10560             | Idiomarina baltica OS145                                           | 867 |
| 185 | A3WVK6 | A3WVK6_9BRAD | Bacteria | NB311A_01385            | Nitrobacter sp. Nb-311A                                            | 892 |
| 185 | A3XAX3 | A3XAX3_9RHOB | Bacteria | MED193_04361            | Roseobacter sp. MED193                                             | 883 |
| 186 | A3XK04 | A3XK04_LEEBM | Bacteria | MED217_03155            | Leeuwenhoekella blandensis (strain CECT 7118 / CCUG 51940 / Mi     | 849 |
| 186 | A3XXN3 | A3XXN3_9VIBR | Bacteria | MED222_22136            | Vibrio sp. MED222                                                  | 860 |
| 187 | A3YGY2 | A3YGY2_9GAMM | Bacteria | alaS MED121_20256       | Marinomonas sp. MED121                                             | 871 |
| 188 | A3YU59 | A3YU59_9SYNE | Bacteria | WH5701_04865            | Synechococcus sp. WH 5701                                          | 896 |
| 189 | A3Z3G5 | A3Z3G5_9SYNE | Bacteria | RS9917_06455            | Synechococcus sp. RS9917                                           | 911 |
| 190 | A4ACW8 | A4ACW8_9GAMM | Bacteria | KT71_18876              | Congregibacter litoralis KT71                                      | 867 |
| 191 | A4AJV8 | A4AJV8_9ACTN | Bacteria | A20C1_03116             | Marine actinobacterium PHSC20C1                                    | 884 |
| 192 | A4AUE8 | A4AUE8_MARSH | Bacteria | FB2170_08839            | Maribacter sp. (strain HTCC2170 / KCCM 42371)                      | 871 |
| 193 | A4BCJ2 | A4BCJ2_9GAMM | Bacteria | MED297_13582            | Reinekea blandensis MED297                                         | 868 |
| 194 | A4BU39 | A4BU39_9GAMM | Bacteria | NB231_12521             | Nitrospiro mobilis Nb-231                                          | 869 |
| 195 | A4BYG0 | A4BYG0_9FLAO | Bacteria | PI23P_05867             | Polaribacter irgensii 23-P                                         | 872 |
| 196 | A4CCF8 | A4CCF8_9GAMM | Bacteria | PTD2_14467              | Pseudoalteromonas tunicata D2                                      | 866 |
| 197 | A4CJG2 | A4CJG2_ROBBH | Bacteria | RB2501_09210            | Robiginitalea bifurcata (strain ATCC BAA-864 / HTCC2501 / KCTC     | 871 |
| 198 | A4CXB1 | A4CXB1_SYNPV | Bacteria | WH7805_10284            | Synechococcus sp. (strain WH7805)                                  | 894 |
| 199 | A4E6Q2 | A4E6Q2_9ACTN | Bacteria | COLAER_00077            | Collinsella aerofaciens ATCC 25986                                 | 878 |
| 200 | A4EKU0 | A4EKU0_9RHOB | Bacteria | RCCS2_17951             | Roseobacter sp. CCS2                                               | 885 |
| 201 | A4ERJ4 | A4ERJ4_9RHOB | Bacteria | alaS RSK20926_19217     | Roseobacter sp. SK209-2-6                                          | 883 |
| 202 | A4FBD3 | SYA_SACEN    | Bacteria | alaS SACE_2052          | Saccharopolyspora erythraea (strain NRRL 23338)                    | 890 |
| 203 | A4G2S9 | SYA_HERAR    | Bacteria | alaS HEAR0616           | Herminiimonas arsenicoxydans                                       | 869 |
| 204 | A4GJ52 | A4GJ52_9DELT | Bacteria |                         | Uncultured marine Nitrospinaceae bacterium                         | 878 |
| 205 | A4GJZ2 | A4GJZ2_9BACT | Bacteria | MBMO_EB80-69G07.0020    | Uncultured marine bacterium EB80_69G07                             | 888 |
| 206 | A4IR80 | SYA_GEOTN    | Bacteria | alaS GTNG_2489          | Geobacillus thermodenitrificans (strain NG80-2)                    | 878 |
| 207 | A4IZ01 | SYA_FRATW    | Bacteria | alaS FTW_1402           | Francisella tularensis subsp. tularensis (strain WY96-3418)        | 865 |
| 208 | A4J2K4 | SYA_DESRM    | Bacteria | alaS Dred_0769          | Desulfotomaculum reducens (strain MI-1)                            | 878 |
| 209 | A4JDM9 | SYA_BURVG    | Bacteria | alaS Bcep1808_1373      | Burkholderia vietnamiensis (strain G4 / LMG 22486) (Burkholderia   | 874 |
| 210 | A4KNY1 | A4KNY1_MYCTU | Bacteria | TBHG_02492              | Mycobacterium tuberculosis str. Haarlem                            | 904 |
| 211 | A4KRN3 | A4KRN3_FRATU | Bacteria | FTHG_01047              | Francisella tularensis subsp. holarctica 257                       | 865 |
| 212 | A4MGH6 | A4MGH6_BURPS | Bacteria | alaS BURPS305_1037      | Burkholderia pseudomallei 305                                      | 874 |
| 213 | A4MWQ5 | A4MWQ5_HAEIF | Bacteria | alaS CGSHi22121_04595   | Haemophilus influenzae 22.1-21                                     | 874 |
| 214 | A4N355 | A4N355_HAEIF | Bacteria | CGSHi22421_04798        | Haemophilus influenzae R3021                                       | 874 |
| 215 | A4N7M2 | A4N7M2_HAEIF | Bacteria | CGSHi3655_06959         | Haemophilus influenzae 3655                                        | 874 |
| 216 | A4NF84 | A4NF84_HAEIF | Bacteria | alaS CGSHiAA_04198      | Haemophilus influenzae PittAA                                      | 874 |
| 217 | A4NKB3 | A4NKB3_HAEIF | Bacteria | alaS CGSHiHH_03458      | Haemophilus influenzae PittHH                                      | 874 |
| 218 | A4NPL1 | A4NPL1_HAEIF | Bacteria | alaS CGSHiII_06419      | Haemophilus influenzae PittII                                      | 874 |
| 219 | A4NX67 | A4NX67_HAEIF | Bacteria | alaS CGSHiR3021_07607   | Haemophilus influenzae 22.4-21                                     | 616 |
| 220 | A4QEK7 | SYA_CORGB    | Bacteria | alaS cgR_1680           | Corynebacterium glutamicum (strain R)                              | 888 |
| 221 | A4SGJ6 | SYA_PROVI    | Bacteria | alaS Cvib_1595          | Prosthecochloris vibriiformis (strain DSM 265) (Chlorobium vibriof | 885 |



|     |        |              |          |                         |                                                                     |     |
|-----|--------|--------------|----------|-------------------------|---------------------------------------------------------------------|-----|
| 222 | A4SS99 | SYA AERS4    | Bacteria | alaS ASA_3811           | Aeromonas salmonicida (strain A449)                                 | 874 |
| 223 | A4SZL8 | SYA POLSQ    | Bacteria | alaS Pnuc_1719          | Polynucleobacter sp. (strain QLV-P1DMWA-1)                          | 874 |
| 224 | A4TBW4 | SYA MYCGI    | Bacteria | alaS Mflv_3763          | Mycobacterium gilvum (strain PYR-GCK) (Mycobacterium flavescens)    | 898 |
| 225 | A4TQ52 | SYA YERPP    | Bacteria | alaS YPDSF_3056         | Yersinia pestis (strain Pestoides F)                                | 875 |
| 226 | A4TZR5 | A4TZR5_9PROT | Bacteria | alaS MGR_3274           | Magnetospirillum gryphiswaldense                                    | 881 |
| 227 | A4VJB3 | SYA PSEU5    | Bacteria | alaS PST_1369           | Pseudomonas stutzeri (strain A1501)                                 | 874 |
| 228 | A4VVR3 | SYA STRSY    | Bacteria | alaS SSU05_1236         | Streptococcus suis (strain 05ZYH33)                                 | 872 |
| 229 | A4W221 | SYA STRS2    | Bacteria | alaS SSU98_1252         | Streptococcus suis (strain 98HAH33)                                 | 872 |
| 230 | A4WDQ6 | SYA ENT38    | Bacteria | alaS Ent638_3172        | Enterobacter sp. (strain 638)                                       | 875 |
| 231 | A4WV47 | SYA RHOS5    | Bacteria | alaS RspH17025_2372     | Rhodobacter sphaeroides (strain ATCC 17025 / ATH 2.4.3)             | 883 |
| 232 | A4X5Z0 | SYA SALTO    | Bacteria | alaS Strop_1828         | Salinispora tropica (strain ATCC BAA-916 / DSM 44818 / CNB-440)     | 892 |
| 233 | A4XKP4 | SYA CALS8    | Bacteria | alaS Ccac_1894          | Caldicellulosiruptor saccharolyticus (strain ATCC 43494 / DSM 8903) | 881 |
| 234 | A4XWE2 | SYA PSEMY    | Bacteria | alaS Pmen_2903          | Pseudomonas mendocina (strain ymp)                                  | 874 |
| 235 | A4Y931 | SYA SHEPC    | Bacteria | alaS Sputcn32_2745      | Shewanella putrefaciens (strain CN-32 / ATCC BAA-453)               | 874 |
| 236 | A4YXQ6 | SYA BRASO    | Bacteria | alaS BRADO4981          | Bradyrhizobium sp. (strain ORS278)                                  | 891 |
| 237 | A5CD03 | SYA ORITB    | Bacteria | alaS OTBS_0574          | Orientia tsutsugamushi (strain Boryong) (Rickettsia tsutsugamushi)  | 891 |
| 238 | A5CRZ5 | SYA CLAM3    | Bacteria | alaS CMM_1802           | Clavibacter michiganensis subsp. michiganensis (strain NCPPB 382)   | 885 |
| 239 | A5CVU0 | SYA VESOH    | Bacteria | alaS COSY_0806          | Vesicomysocius okutanii subsp. Calyptogena okutanii (strain HA)     | 865 |
| 240 | A5D3F4 | SYA PELTS    | Bacteria | alaS PTH_1060/PTH_1061  | Pelotomaculum thermopropionicum (strain DSM 13744 / JCM 1097)       | 877 |
| 240 | A5EML9 | SYA BRASB    | Bacteria | alaS BBta_5448          | Bradyrhizobium sp. (strain BTAi1 / ATCC BAA-1182)                   | 896 |
| 241 | A5EW88 | SYA DICNV    | Bacteria | alaS DNO_0286           | Dichelobacter nodosus (strain VCS1703A)                             | 873 |
| 241 | A5F9B7 | SYA VIBC3    | Bacteria | alaS VCO395_A0072_VC395 | Vibrio cholerae serotype O1 (strain ATCC 39541 / Oqawa 395 / O395)  | 860 |
| 242 | A5FIP9 | SYA FLAJ1    | Bacteria | alaS Fjoh_1894          | Flavobacterium johnsoniae (strain ATCC 17061 / DSM 2064 / UW10)     | 879 |
| 242 | A5FXC2 | SYA ACICJ    | Bacteria | alaS Acry_1038          | Acidiphilium cryptum (strain JF-5)                                  | 878 |
| 243 | A5GD98 | SYA GEOUR    | Bacteria | alaS Gura_0222          | Geobacter uraniireducens (strain Rf4) (Geobacter uraniumreducens)   | 876 |
| 244 | A5GPF9 | SYA SYNPW    | Bacteria | alaS SynWH7803_2398     | Synechococcus sp. (strain WH7803)                                   | 891 |
| 245 | A5GWM4 | SYA SYNRR3   | Bacteria | alaS SynRCC307_2380     | Synechococcus sp. (strain RCC307)                                   | 882 |
| 246 | A5I4Z5 | SYA CLOBH    | Bacteria | alaS CBO2564_CLC_2435   | Clostridium botulinum (strain Hall / ATCC 3502 / NCTC 13319 / Typ)  | 879 |
| 247 | A5ICV6 | SYA LEGPC    | Bacteria | alaS LPC_1243           | Legionella pneumophila (strain Corby)                               | 860 |
| 248 | A5IMH8 | SYA THEP1    | Bacteria | alaS Tpet_1387          | Thermotoga petrophila (strain RKU-1 / ATCC BAA-488 / DSM 13995)     | 863 |
| 249 | A5ITE5 | SYA STAA9    | Bacteria | alaS SaurJH9_1675       | Staphylococcus aureus (strain JH9)                                  | 876 |
| 250 | A5IYK5 | SYA MYCAP    | Bacteria | alaS MAG4160            | Mycoplasma agalactiae (strain PG2)                                  | 880 |
| 251 | A5KL29 | A5KL29_9FIRM | Bacteria | RUMTOR_00933            | Ruminococcus torques ATCC 27756                                     | 880 |
| 252 | A5L312 | A5L312_9GAMM | Bacteria | alaS VSWAT3_20595       | Vibrionales bacterium SWAT-3                                        | 860 |
| 253 | A5LES2 | A5LES2_STRPN | Bacteria | alaS CGSSp3BS71_04579   | Streptococcus pneumoniae SP3-BS71                                   | 872 |
| 254 | A5LNG4 | A5LNG4_STRPN | Bacteria | CGSSp6BS73_04985        | Streptococcus pneumoniae SP6-BS73                                   | 872 |
| 255 | A5LTK3 | A5LTK3_STRPN | Bacteria | alaS CGSSp9BS68_10220   | Streptococcus pneumoniae SP9-BS68                                   | 872 |
| 256 | A5M0S0 | A5M0S0_STRPN | Bacteria | alaS CGSSp11BS70_01712  | Streptococcus pneumoniae SP11-BS70                                  | 872 |
| 257 | A5M7Z4 | A5M7Z4_STRPN | Bacteria | CGSSp14BS69_03503       | Streptococcus pneumoniae SP14-BS69                                  | 449 |
| 258 | A5MHF6 | A5MHF6_STRPN | Bacteria | alaS CGSSp18BS74_00801  | Streptococcus pneumoniae SP18-BS74                                  | 872 |
| 259 | A5MML7 | A5MML7_STRPN | Bacteria | CGSSp19BS75_06627       | Streptococcus pneumoniae SP19-BS75                                  | 872 |
| 260 | A5MSZ9 | A5MSZ9_STRPN | Bacteria | CGSSp23BS72_05265       | Streptococcus pneumoniae SP23-BS72                                  | 872 |
| 261 | A5N7T5 | SYA CLOK5    | Bacteria | alaS CKL_1324           | Clostridium kluyveri (strain ATCC 8527 / DSM 555 / NCIMB 10680)     | 879 |
| 261 | A5P753 | A5P753_9SPHN | Bacteria | ED21_26823              | Erythrobacter sp. SD-21                                             | 887 |
| 262 | A5TLU9 | A5TLU9_BURMA | Bacteria | alaS BMA721280_A0255    | Burkholderia mallei 2002721280                                      | 874 |
| 262 | A5TW59 | A5TW59_FUSNP | Bacteria | alaS FNP_1351           | Fusobacterium nucleatum subsp. polymorphum ATCC 10953               | 867 |
| 263 | A5U5Q5 | SYA MYCTA    | Bacteria | alaS MRA_2584           | Mycobacterium tuberculosis (strain ATCC 25177 / H37Ra)              | 904 |
| 264 | A5UDR0 | SYA HAEIE    | Bacteria | alaS CGSHiEE_07990      | Haemophilus influenzae (strain PittEE)                              | 874 |
| 263 | A5UHW6 | SYA HAEIG    | Bacteria | alaS CGSHiGG_07565      | Haemophilus influenzae (strain PittGG)                              | 874 |
| 264 | A5UY81 | SYA ROSS1    | Bacteria | alaS CGSSp18BS74_00801  | Roseiflexus sp. (strain RS-1)                                       | 905 |
| 265 | A5V3L0 | SYA SPHWW    | Bacteria | alaS Swit_0508          | Sphingomonas wittichii (strain RW1 / DSM 6014 / JCM 10273)          | 887 |
| 266 | A5VIX7 | A5VIX7_LACRD | Bacteria | Lreu_0533               | Lactobacillus reuteri (strain DSM 20016)                            | 884 |
| 267 | A5VQX4 | SYA BRUO2    | Bacteria | alaS BOV_1164           | Brucella ovis (strain ATCC 25840 / 63/290 / NCTC 10512)             | 885 |
| 268 | A5W0D9 | SYA PSEP1    | Bacteria | alaS Pput_1441          | Pseudomonas putida (strain F1 / ATCC 700007)                        | 874 |
| 269 | A5WFW1 | SYA PSYWF    | Bacteria | alaS PsycPRwf_1611      | Psychrobacter sp. (strain PRwf-1)                                   | 903 |
| 270 | A5WQG4 | A5WQG4_MYCTF | Bacteria | TBFG_12576              | Mycobacterium tuberculosis (strain F11)                             | 904 |
| 271 | A5XI03 | A5XI03_BURMA | Bacteria | alaS BMAFMH_C0415       | Burkholderia mallei FMH                                             | 874 |
| 272 | A5XNU1 | A5XNU1_BURMA | Bacteria | alaS BMAJHU_C0438       | Burkholderia mallei JHU                                             | 874 |
| 273 | A5Z6C2 | A5Z6C2_9FIRM | Bacteria | EUBVEN_01255            | Eubacterium ventriosum ATCC 27560                                   | 886 |
| 274 | A5ZFM3 | A5ZFM3_9BACE | Bacteria | BACCAC_01688            | Bacteroides caccae ATCC 43185                                       | 872 |
| 275 | A5ZQA6 | A5ZQA6_9FIRM | Bacteria | RUMOBE_01176            | Ruminococcus obeum ATCC 29174                                       | 683 |
| 276 | A6A6C5 | A6A6C5_VIBCH | Bacteria | alaS A5A_0529           | Vibrio cholerae MZO-2                                               | 860 |
| 277 | A6AEW3 | A6AEW3_VIBCH | Bacteria | alaS A59_0589           | Vibrio cholerae 623-39                                              | 860 |
| 278 | A6AW09 | A6AW09_VIBHA | Bacteria | alaS A1Q_0277           | Vibrio harveyi HY01                                                 | 860 |
| 279 | A6B6D7 | A6B6D7_VIBPA | Bacteria | alaS A79_4202           | Vibrio parahaemolyticus AQ3810                                      | 860 |
| 280 | A6BDT6 | A6BDT6_9FIRM | Bacteria | DORLON_00452            | Dorea longicatena DSM 13814                                         | 887 |
| 281 | A6BYJ4 | A6BYJ4_YERPE | Bacteria | alaS YPE_4111           | Yersinia pestis CA88-4125                                           | 875 |
| 282 | A6D4F3 | A6D4F3_9VIBR | Bacteria | alaS VSAK1_02069        | Vibrio shilonii AK1                                                 | 861 |
| 283 | A6DGR8 | A6DGR8_9BACT | Bacteria | LNTAR_23384             | Lentisphaera araneosa HTCC2155                                      | 899 |
| 284 | A6E087 | A6E087_9RHOB | Bacteria | alaS RTM1035_08754      | Roseovarius sp. TM1035                                              | 893 |
| 285 | A6ECC4 | A6ECC4_9SPHI | Bacteria | PBAL39_18189            | Pedobacter sp. BAL39                                                | 900 |
| 286 | A6EMB9 | A6EMB9_9BACT | Bacteria | alaS SCB49_07917        | Unidentified eubacterium SCB49                                      | 872 |
| 287 | A6F5K3 | A6F5K3_9ALTE | Bacteria | MDG893_09150            | Marinobacter algicola DG893                                         | 876 |
| 287 | A6FG67 | A6FG67_9GAMM | Bacteria | PE36_22815              | Moritella sp. PE36                                                  | 873 |
| 288 | A6FSR3 | A6FSR3_9RHOB | Bacteria | RAZWK3B_15248           | Roseobacter sp. AzwK-3b                                             | 887 |
| 289 | A6GT92 | A6GT92_9BURK | Bacteria | alaS LMED105_07508      | Limnobacter sp. MED105                                              | 878 |
| 290 | A6H0Y3 | SYA FLAPJ    | Bacteria | alaS FP1941             | Flavobacterium psychrophilum (strain JIP02/86 / ATCC 49511)         | 887 |

|     |        |              |          |                         |                                                                         |     |
|-----|--------|--------------|----------|-------------------------|-------------------------------------------------------------------------|-----|
| 289 | A6L1L8 | SYA BACV8    | Bacteria | alaS BVU_1908           | Bacteroides vulgatus (strain ATCC 8482 / DSM 1447 / NCTC 11154)         | 871 |
| 290 | A6LEZ8 | SYA PARD8    | Bacteria | alaS BDI_2543           | Parabacteroides distasonis (strain ATCC 8503 / DSM 20701 / NCTC 873)    | 873 |
| 291 | A6LMH9 | SYA THEM4    | Bacteria | alaS Tmel_1281          | Thermosiphonia melanesiensis (strain B1429 / DSM 12029)                 | 859 |
| 291 | A6LSF6 | SYA CLOB8    | Bacteria | alaS Cbei_1104          | Clostridium beijerinckii (strain ATCC 51743 / NCIMB 8052) (Clostridium) | 879 |
| 292 | A6NU17 | A6NU17_9BACE | Bacteria | BACCAP_01697            | Bacteroides capillosus ATCC 29799                                       | 890 |
| 293 | A6Q576 | SYA NITS5    | Bacteria | alaS NIS_1528           | Nitratiruptor sp. (strain SB155-2)                                      | 850 |
| 294 | A6QHF9 | SYA STAAE    | Bacteria | alaS NWMN_1519          | Staphylococcus aureus (strain Newman)                                   | 876 |
| 295 | A6QKU6 | A6QKU6_ONYPE | Bacteria | alaS                    | Onion yellows phytoplasma OY-W                                          | 864 |
| 296 | A6SVH6 | SYA JANMA    | Bacteria | alaS mma_0583           | Janthinobacterium sp. (strain Marseille) (Minibacterium massiliensis)   | 869 |
| 297 | A6TCV9 | SYA KLEP7    | Bacteria | alaS KPN78578_29690_KPN | Klebsiella pneumoniae subsp. pneumoniae (strain ATCC 700721 / M         | 875 |
| 298 | A6TQZ4 | SYA ALKMQ    | Bacteria | alaS Amet_2458          | Alkaliphilus metalliredigens (strain QYMF)                              | 880 |
| 299 | A6U287 | SYA STAA2    | Bacteria | alaS SaurJH1_1709       | Staphylococcus aureus (strain JH1)                                      | 876 |
| 300 | A6U9N4 | SYA SINMW    | Bacteria | alaS Smed_1521          | Sinorhizobium medicae (strain WSM419) (Ensifer medicae)                 | 887 |
| 301 | A6VA71 | SYA PSEA7    | Bacteria | alaS PSPA7_4612         | Pseudomonas aeruginosa (strain PA7)                                     | 874 |
| 302 | A6VKD6 | SYA ACTS2    | Bacteria | alaS Asuc_0052          | Actinobacillus succinogenes (strain ATCC 55618 / 130Z)                  | 874 |
| 303 | A6W1F1 | SYA MARMS    | Bacteria | alaS Mmwyl1_3628        | Marinomonas sp. (strain MWYL1)                                          | 872 |
| 304 | A6WCF7 | SYA KINRD    | Bacteria | alaS Krad_3032          | Kineococcus radiotolerans (strain ATCC BAA-149 / DSM 14245 / SR         | 893 |
| 305 | A6WR16 | SYA SHEB8    | Bacteria | alaS Shew185_3124       | Shewanella baltica (strain OS185)                                       | 874 |
| 306 | A6X0E9 | SYA OCHA4    | Bacteria | alaS Oant_1987          | Ochrobactrum anthropi (strain ATCC 49188 / DSM 6882 / NCTC 12           | 885 |
| 306 | A6XXS7 | A6XXS7_VIBCH | Bacteria | alaS A33_0519           | Vibrio cholerae AM-19226                                                | 860 |
| 307 | A7A636 | A7A636_BIFAD | Bacteria | BIFADO_01314            | Bifidobacterium adolescentis L2-32                                      | 892 |
| 308 | A7AIQ1 | A7AIQ1_9PORP | Bacteria | PARMER_03308            | Parabacteroides merdae ATCC 43184                                       | 875 |
| 309 | A7AYC0 | A7AYC0_RUMGN | Bacteria | RUMGNA_00285            | Ruminococcus gnavus ATCC 29149                                          | 879 |
| 310 | A7BCJ7 | A7BCJ7_9ACTO | Bacteria | ACTODO_01378            | Actinomyces odontolyticus ATCC 17982                                    | 902 |
| 308 | A7FLR7 | SYA YERP3    | Bacteria | alaS YpsIP31758_3238    | Yersinia pseudotuberculosis serotype O:1b (strain IP 31758)             | 875 |
| 309 | A7FWJ5 | SYA CLOB1    | Bacteria | alaS CLB_2505           | Clostridium botulinum (strain ATCC 19397 / Type A)                      | 879 |
| 310 | A7GGF1 | SYA CLOBL    | Bacteria | alaS CLI_2627           | Clostridium botulinum (strain Langeland / NCTC 10281 / Type F)          | 879 |
| 311 | A7GT67 | SYA BACCN    | Bacteria | alaS Bcer98_3101        | Bacillus cereus subsp. cytotoxigenus (strain NVH 391-98)                | 880 |
| 312 | A7HH87 | SYA ANADF    | Bacteria | alaS Anaef109_3904      | Anaeromyxobacter sp. (strain Fw109-5)                                   | 904 |
| 313 | A7HN59 | SYA FERNB    | Bacteria | alaS Fnod_1499          | Fervidobacterium nodosum (strain ATCC 35602 / DSM 5306 / Rt17-          | 867 |
| 310 | A7HWA5 | SYA PARL1    | Bacteria | alaS Plav_2579          | Parvibaculum lavamentivorans (strain DS-1 / DSM 13023 / NCIMB           | 892 |
| 311 | A7IMR0 | SYA XANP2    | Bacteria | alaS Xaut_4081          | Xanthobacter autotrophicus (strain ATCC BAA-1158 / Py2)                 | 884 |
| 311 | A7JCW9 | A7JCW9_FRATT | Bacteria | FTBG_00455              | Francisella tularensis subsp. tularensis FSC033                         | 865 |
| 312 | A7JHC7 | A7JHC7_FRANO | Bacteria | FTCG_00305              | Francisella novicida GA99-3549                                          | 865 |
| 313 | A7JLH7 | A7JLH7_FRANO | Bacteria | FTDG_00357              | Francisella novicida GA99-3548                                          | 865 |
| 314 | A7JQM3 | A7JQM3_PASHA | Bacteria | alaS MHA_0381           | Neisseria haemolytica PHL213                                            | 875 |
| 315 | A7K6B8 | A7K6B8_VIBSE | Bacteria | alaS VEA_002521_VEx25_1 | Vibrio sp. (strain Ex25)                                                | 860 |
| 316 | A7M3X4 | A7M3X4_BACOV | Bacteria | BACOVA_04814            | Bacteroides ovatus ATCC 8483                                            | 872 |
| 317 | A7MJ41 | SYA ENTS8    | Bacteria | alaS ESA_00569          | Enterobacter sakazakii (strain ATCC BAA-894)                            | 875 |
| 318 | A7MYT5 | SYA VIBHB    | Bacteria | alaS VIBHAR_03511       | Vibrio Harveyi (strain ATCC BAA-1116 / BB120)                           | 865 |
| 319 | A7NCD9 | SYA FRATF    | Bacteria | alaS FTA_1166           | Francisella tularensis subsp. holarctica (strain FTNF002-00 / FTA)      | 865 |
| 320 | A7NQA5 | SYA ROSCS    | Bacteria | alaS Rcas_3711          | Roseiflexus castenholzii (strain DSM 13941 / HLO8)                      | 905 |
| 321 | A7V7V7 | A7V7V7_BACUN | Bacteria | BACUNI_03673            | Bacteroides uniformis ATCC 8492                                         | 872 |
| 322 | A7VB88 | A7VB88_9CLOT | Bacteria | CLOL250_00149           | Clostridium sp. L2-50                                                   | 888 |
| 323 | A7VTK0 | A7VTK0_9CLOT | Bacteria | CLOLEP_01892            | Clostridium leptum DSM 753                                              | 877 |
| 324 | A7X328 | SYA STAA1    | Bacteria | alaS SAHV_1605          | Staphylococcus aureus (strain Mu3 / ATCC 700698)                        | 876 |
| 325 | A7YTY0 | A7YTY0_FRATU | Bacteria | FTAG_00379              | Francisella tularensis subsp. holarctica FSC022                         | 865 |
| 326 | A7Z735 | SYA BACA2    | Bacteria | alaS RBAM_024510        | Bacillus amyloliquefaciens (strain FZB42)                               | 878 |
| 327 | A7ZQC5 | SYA ECO24    | Bacteria | alaS EcE24377A_2980     | Escherichia coli O139:H28 (strain E24377A / ETEC)                       | 876 |
| 328 | A8A3H4 | SYA ECOHS    | Bacteria | alaS EchS_A2833         | Escherichia coli O9:H4 (strain HS)                                      | 876 |
| 329 | A8ANQ1 | SYA CITK8    | Bacteria | alaS CKO_04048          | Citrobacter koseri (strain ATCC BAA-895 / CDC 4225-83 / SGSC469         | 875 |
| 330 | A8AY18 | SYA STRGC    | Bacteria | alaS SGO_1570           | Streptococcus gordonii (strain Challis / ATCC 35105 / CH1 / DL1 / \     | 872 |
| 331 | A8EEG7 | A8EEG7_BURPS | Bacteria | alaS BURPS406E_H1316    | Burkholderia pseudomallei 406e                                          | 874 |
| 332 | A8EWI6 | SYA ARCB4    | Bacteria | alaS Abu_2092           | Arcobacter butzleri (strain RM4018)                                     | 851 |
| 333 | A8F078 | SYA RICCK    | Bacteria | alaS A1E_05485          | Rickettsia canadensis (strain McKiel)                                   | 878 |
| 334 | A8F323 | SYA RICM5    | Bacteria | alaS RMA_1379           | Rickettsia massiliae (strain MtU5)                                      | 878 |
| 335 | A8F866 | SYA THELT    | Bacteria | alaS Tlet_1796          | Thermotoga lettingae (strain ATCC BAA-301 / DSM 14385 / TMO)            | 858 |
| 336 | A8FFM9 | SYA BACP2    | Bacteria | alaS BPUM_2380          | Bacillus pumilus (strain SAFR-032)                                      | 878 |
| 337 | A8FSV6 | SYA SHESH    | Bacteria | alaS Ssed_1318          | Shewanella sediminis (strain HAW-EB3)                                   | 874 |
| 338 | A8G242 | SYA PROM2    | Bacteria | alaS P9215_00541        | Prochlorococcus marinus (strain MIT 9215)                               | 886 |
| 339 | A8GA09 | SYA SERP5    | Bacteria | alaS Spro_0843          | Serratia proteamaculans (strain 568)                                    | 875 |
| 340 | A8GQ73 | SYA RICAH    | Bacteria | alaS A1C_06625          | Rickettsia akari (strain Hartford)                                      | 878 |
| 341 | A8GU16 | SYA RICRS    | Bacteria | alaS A1G_07260          | Rickettsia rickettsii (strain Sheila Smith)                             | 877 |
| 342 | A8H1T6 | SYA SHEPA    | Bacteria | alaS Spea_1196          | Shewanella pealeana (strain ATCC 700345 / ANG-SQ1)                      | 875 |
| 343 | A8ICW8 | SYA AZOC5    | Bacteria | alaS AZC_2854           | Azorhizobium caulinodans (strain ATCC 43989 / DSM 5975 / ORS 5          | 881 |
| 344 | A8KMJ5 | A8KMJ5_BURPS | Bacteria | alaS BURPSPAST_AA0314   | Burkholderia pseudomallei Pasteur 52237                                 | 874 |
| 345 | A8LCW4 | SYA FRASN    | Bacteria | alaS Franean1_1694      | Frankia sp. (strain EAN1pec)                                            | 880 |
| 346 | A8LL20 | SYA DINSH    | Bacteria | alaS Dshi_1642          | Dinoroseobacter shibae (strain DFL 12)                                  | 887 |
| 347 | A8LXY8 | SYA SALAI    | Bacteria | alaS Sare_1819          | Salinispora arenicola (strain CNS-205)                                  | 892 |
| 348 | A8MGI3 | SYA ALKOO    | Bacteria | alaS Clos_1666          | Alkaliphilus oremlandii (strain OhILAs) (Clostridium oremlandii (stra   | 880 |
| 348 | A8PPB9 | A8PPB9_9COXI | Bacteria | alaS RICGR_1261         | Rickettsia grylli                                                       | 871 |
| 349 | A8RCB2 | A8RCB2_9FIRM | Bacteria | EUBDOL_01333            | Eubacterium dolichum DSM 3991                                           | 874 |
| 350 | A8RUG0 | A8RUG0_9CLOT | Bacteria | CLOBOL_04007            | Clostridium boltea ATCC BAA-613                                         | 887 |
| 350 | A8S649 | A8S649_9FIRM | Bacteria | FAEPRAM212_00076        | Faecalibacterium prausnitzii M21/2                                      | 886 |
| 351 | A8SNA4 | A8SNA4_9FIRM | Bacteria | PEPMIC_01604            | Parvimonas micra ATCC 33270                                             | 868 |
| 351 | A8SPD7 | A8SPD7_9FIRM | Bacteria | COPEUT_00259            | Coprococcus euctactus ATCC 27759                                        | 887 |
| 352 | A8T9C0 | A8T9C0_9VIBR | Bacteria | alaS AND4_13983         | Vibrio sp. AND4                                                         | 865 |

|     |        |              |          |                         |                                                                   |     |
|-----|--------|--------------|----------|-------------------------|-------------------------------------------------------------------|-----|
| 353 | A8TPL8 | A8TPL8_9PROT | Bacteria | BAL199_01889            | Alpha proteobacterium BAL199                                      | 889 |
| 352 | A8U8E7 | A8U8E7_9LACT | Bacteria | CAT7_07863              | Carnobacterium sp. AT7                                            | 882 |
| 353 | A8UGM1 | A8UGM1_9FLAO | Bacteria | FBALC1_12872            | Flavobacteriales bacterium ALC-1                                  | 870 |
| 354 | A8UQV1 | A8UQV1_9AQUI | Bacteria | HG1285_02558            | Hydrogenivirga sp. 128-5-R1-1                                     | 873 |
| 355 | A8YLG8 | A8YLG8_MICAE | Bacteria | alaS IPF_2701           | Microcystis aeruginosa PCC 7806                                   | 878 |
| 356 | A8YTJ0 | SYA_LACH4    | Bacteria | alaS Lhv_0438           | Lactobacillus helveticus (strain DPC 4571)                        | 879 |
| 357 | A8Z4F6 | SYA_STAAT    | Bacteria | alaS USA300HOU_1618     | Staphylococcus aureus (strain USA300 / TCH1516)                   | 877 |
| 358 | A8ZY67 | SYA_DESOH    | Bacteria | alaS Dole_1268          | Desulfococcus oleovorans (strain DSM 6200 / Hxd3)                 | 876 |
| 359 | A9AC16 | SYA_BURM1    | Bacteria | alaS Bmul_1906 BMULJ_01 | Burkholderia multivorans (strain ATCC 17616 / 249)                | 874 |
| 360 | A9B660 | SYA_HERA2    | Bacteria | alaS Haur_3635          | Herpetosiphon aurantiacus (strain ATCC 23779 / DSM 785)           | 889 |
| 361 | A9B9E5 | SYA_PROM4    | Bacteria | alaS P9211_00511        | Prochlorococcus marinus (strain MIT 9211)                         | 890 |
| 362 | A9BJE0 | SYA_PETMO    | Bacteria | alaS Pmob_0620          | Petrotoxa mobilis (strain DSM 10674 / SJ95)                       | 876 |
| 363 | A9C0B9 | SYA_DELAS    | Bacteria | alaS Daci_4054          | Delftia acidovorans (strain DSM 14801 / SPH-1)                    | 874 |
| 364 | A9D6C7 | A9D6C7_9GAMM | Bacteria | KT99_17131              | Shewanella benthica KT99                                          | 874 |
| 365 | A9D6E8 | A9D6E8_9RHIZ | Bacteria | alaS HPDFL43_09612      | Hoeflea phototrophica DFL-43                                      | 884 |
| 366 | A9DQ01 | A9DQ01_9FLAO | Bacteria | KAOT1_20457             | Kordia algicida OT-1                                              | 870 |
| 367 | A9E4G5 | A9E4G5_9RHOB | Bacteria | alaS OIHLE45_12785      | Oceanibulbus indolifex HEL-45                                     | 885 |
| 368 | A9EMD8 | A9EMD8_9RHOB | Bacteria | alaS RG210_16435        | Phaeobacter gallaeciensis 2.10                                    | 883 |
| 369 | A9FNH4 | A9FNH4_9RHOB | Bacteria | RGBS107_14751           | Phaeobacter gallaeciensis BS107                                   | 883 |
| 370 | A9GSY7 | A9GSY7_9RHOB | Bacteria | alaS RLO149_20819       | Roseobacter litoralis Och 149                                     | 885 |
| 371 | A9IK31 | SYA_BORPD    | Bacteria | alaS Bpet2002           | Bordetella petrii (strain ATCC BAA-461 / DSM 12804 / CCUG 43448)  | 873 |
| 372 | A9IVY8 | SYA_BART1    | Bacteria | alaS BT_1489            | Bartonella tribocorum (strain CIP 105476 / IBS 506)               | 888 |
| 373 | A9KB02 | A9KB02_BURMA | Bacteria | alaS BMA10399_E0494     | Burkholderia mallei ATCC 10399                                    | 874 |
| 374 | A9KG28 | SYA_COXBN    | Bacteria | alaS CBUD_0990          | Coxiella burnetii (strain Dugway 5J108-111)                       | 865 |
| 375 | A9KLZ5 | SYA2_CLOPH   | Bacteria | alaS2 Cphy_0956         | Clostridium phytofermentans (strain ATCC 700394 / DSM 18823 / I   | 591 |
| 376 | A9KMW7 | SYA1_CLOPH   | Bacteria | alaS1 Cphy_2617         | Clostridium phytofermentans (strain ATCC 700394 / DSM 18823 / I   | 879 |
| 377 | A9KYF8 | SYA_SHEB9    | Bacteria | alaS Sbal195_3267       | Shewanella baltica (strain OS195)                                 | 874 |
| 378 | A9M198 | SYA_NEIMO    | Bacteria | alaS NMCC_1505          | Neisseria meningitidis serogroup C (strain 053442)                | 874 |
| 379 | A9M5L7 | SYA_BRUC2    | Bacteria | alaS BCAN_A1223         | Brucella canis (strain ATCC 23365 / NCTC 10854)                   | 885 |
| 380 | A9MFZ1 | SYA_SALAR    | Bacteria | alaS SARI_00146         | Salmonella arizonae (strain ATCC BAA-731 / CDC346-86 / RSK2980    | 876 |
| 381 | A9N0C1 | SYA_SALPB    | Bacteria | alaS SPAB_03515         | Salmonella paratyphi B (strain ATCC BAA-1250 / SPB7)              | 876 |
| 382 | A9NCN7 | SYA_COXBR    | Bacteria | alaS COXBURSA331_A0883  | Coxiella burnetii (strain RSA 331 / Henzerling II)                | 865 |
| 383 | A9NGN9 | SYA_ACHLI    | Bacteria | alaS ACL_0906           | Acholeplasma laidlawii (strain PG-8A)                             | 851 |
| 384 | A9R0V7 | SYA_YERPG    | Bacteria | alaS YpAngola_A0898     | Yersinia pestis bv. Antiqua (strain Angola)                       | 875 |
| 385 | A9VI09 | SYA_BACWK    | Bacteria | alaS BcerKBAB4_4235     | Bacillus weihenstephanensis (strain KBAB4)                        | 880 |
| 386 | A9W5Y4 | SYA_METEP    | Bacteria | alaS Mext_2598          | Methylobacterium extorquens (strain PA1)                          | 891 |
| 387 | A9WCR2 | SYA_CHLAA    | Bacteria | alaS Caur_3847          | Chloroflexus aurantiacus (strain ATCC 29366 / DSM 635 / J-10-fl)  | 894 |
| 388 | A9WSC4 | SYA_RENSM    | Bacteria | alaS RSa133209_1979     | Renibacterium salmoninarum (strain ATCC 33209 / DSM 20767 / IF    | 896 |
| 389 | A9Z5H5 | A9Z5H5_YERPE | Bacteria | alaS YPIP275_4227       | Yersinia pestis biovar Orientalis str. IP275                      | 875 |
| 390 | A9ZH61 | A9ZH61_COXBU | Bacteria | alaS COXBURSA334_0924   | Coxiella burnetii RSA 334                                         | 865 |
| 391 | A9ZXV0 | A9ZXV0_YERPE | Bacteria | alaS YpF1991016_2641    | Yersinia pestis biovar Orientalis str. F1991016                   | 875 |
| 392 | B0AAN0 | B0AAN0_9CLOT | Bacteria | CLOBAR_02185            | Clostridium bartlettii DSM 16795                                  | 879 |
| 393 | B0AX27 | B0AX27_BACAN | Bacteria | alaS BAC_4615           | Bacillus anthracis str. A0488                                     | 880 |
| 394 | B0B8X5 | SYA_CHLT2    | Bacteria | alaS CTL0118            | Chlamydia trachomatis serovar L2 (strain 434/Bu / ATCC VR-902B)   | 875 |
| 395 | B0BAK4 | SYA_CHLTB    | Bacteria | alaS CTLon_0118         | Chlamydia trachomatis serovar L2b (strain UCH-1/proctitis)        | 875 |
| 396 | B0BNS8 | SYA_ACTPJ    | Bacteria | alaS APJL_0644          | Actinobacillus pleuropneumoniae serotype 3 (strain JL03)          | 874 |
| 397 | B0BVK9 | SYA_RICRO    | Bacteria | alaS RrIowa_1552        | Rickettsia rickettsii (strain Iowa)                               | 877 |
| 398 | B0CFX4 | SYA_ACAM1    | Bacteria | alaS AM1_4444           | Acaryochloris marina (strain MBIC 11017)                          | 873 |
| 399 | B0CGZ9 | SYA_BRUS1    | Bacteria | alaS BSUIS_A1249        | Brucella suis (strain ATCC 23445 / NCTC 10510)                    | 885 |
| 400 | B0G1H3 | B0G1H3_9FIRM | Bacteria | DORFOR_00092            | Dorea formicigenerans ATCC 27755                                  | 893 |
| 401 | B0GB35 | B0GB35_YERPE | Bacteria | alaS YpUG050454_0851    | Yersinia pestis biovar Antiqua str. UG05-0454                     | 875 |
| 402 | B0GVR5 | B0GVR5_YERPE | Bacteria | alaS YpMG051020_1071    | Yersinia pestis biovar Orientalis str. MG05-1020                  | 875 |
| 403 | B0H1A0 | B0H1A0_YERPE | Bacteria | alaS YpK1973002_2339    | Yersinia pestis biovar Mediaevalis str. K1973002                  | 875 |
| 404 | B0HJL8 | B0HJL8_YERPE | Bacteria | alaS YpB42003004_3502   | Yersinia pestis biovar Antiqua str. B42003004                     | 875 |
| 405 | B0HV92 | B0HV92_YERPE | Bacteria | alaS YpE1979001_2315    | Yersinia pestis biovar Antiqua str. E1979001                      | 875 |
| 406 | B0J184 | SYA_MICAN    | Bacteria | alaS MAE_25600          | Microcystis aeruginosa (strain NIES-843)                          | 874 |
| 407 | B0K0Q1 | SYA_THEPX    | Bacteria | alaS Teth514_1489       | Thermoanaerobacter sp. (strain X514)                              | 877 |
| 408 | B0K994 | SYA_THEP3    | Bacteria | alaS Teth39_1052        | Thermoanaerobacter pseudethanolicus (strain ATCC 33223 / 39E) (   | 877 |
| 409 | B0KR43 | SYA_PSEPG    | Bacteria | alaS PputGB1_3979       | Pseudomonas putida (strain GB-1)                                  | 874 |
| 410 | B0MDQ1 | B0MDQ1_9FIRM | Bacteria | ANACAC_01694            | Anaerostipes caccae DSM 14662                                     | 868 |
| 411 | B0ML56 | B0ML56_9FIRM | Bacteria | EUBSIR_00542            | Eubacterium siraeum DSM 15702                                     | 878 |
| 412 | B0MXJ4 | B0MXJ4_9BACT | Bacteria | ALIPUT_01857            | Alistipes putredinis DSM 17216                                    | 847 |
| 413 | B0N6U6 | B0N6U6_9FIRM | Bacteria | CLORAM_02329            | Clostridium ramosum DSM 1402                                      | 869 |
| 414 | B0NAH2 | B0NAH2_EUBSP | Bacteria | CLOSCI_00441            | Clostridium scindens ATCC 35704                                   | 879 |
| 415 | B0NV37 | B0NV37_BACSE | Bacteria | BACSTE_03375            | Bacteroides stercoris ATCC 43183                                  | 873 |
| 416 | B0P1J2 | B0P1J2_9CLOT | Bacteria | CLOSS21_01816           | Clostridium sp. SS2/1                                             | 868 |
| 417 | B0PDV5 | B0PDV5_9FIRM | Bacteria | ANACOL_02740            | Anaerotruncus colihominis DSM 17241                               | 926 |
| 418 | B0Q0U2 | B0Q0U2_BACAN | Bacteria | alaS BAQ_4643           | Bacillus anthracis str. A0193                                     | 880 |
| 419 | B0QPX7 | B0QPX7_BACAN | Bacteria | alaS BAH_4669           | Bacillus anthracis str. A0442                                     | 880 |
| 420 | B0QT25 | B0QT25_HAEPR | Bacteria | HPS_06764               | Haemophilus parasuis 29755                                        | 853 |
| 421 | B0REK2 | SYA_CLAMS    | Bacteria | alaS CMS0729            | Clavibacter michiganensis subsp. sepedonicus (strain ATCC 33113 / | 885 |
| 422 | B0RTY1 | SYA_XANCB    | Bacteria | alaS xcc-b100_2535      | Xanthomonas campestris pv. campestris (strain B100)               | 882 |
| 423 | B0S104 | SYA_FINM2    | Bacteria | alaS FMG_0626           | Fingoldia magna (strain ATCC 29328) (Peptostreptococcus magnu     | 873 |
| 424 | B0SZN4 | SYA_CAUSK    | Bacteria | alaS Caul_1394          | Caulobacter sp. (strain K31)                                      | 883 |
| 425 | B0TFY7 | SYA_HELMI    | Bacteria | alaS Helmi_02400 HM1_05 | Hellobacterium modesticaldum (strain ATCC 51547 / Ice1)           | 883 |
| 426 | B0TK15 | SYA_SHEHH    | Bacteria | alaS Shal_1233          | Shewanella halifaxensis (strain HAW-EB4)                          | 874 |
| 427 | B0TZY8 | SYA_FRAP2    | Bacteria | alaS Fphi_1675          | Francisella philomiragia subsp. philomiragia (strain ATCC 25017)  | 865 |



|     |        |              |          |                       |                                                                   |     |
|-----|--------|--------------|----------|-----------------------|-------------------------------------------------------------------|-----|
| 428 | BOU1K9 | SYA_XYLFM    | Bacteria | alaS_Xfasm12_0101     | Xylella fastidiosa (strain M12)                                   | 884 |
| 429 | BOUGC4 | SYA_METS4    | Bacteria | alaS_M446_5834        | Methylobacterium sp. (strain 4-46)                                | 886 |
| 430 | BOUTE1 | SYA_HAES2    | Bacteria | alaS_HSM_1060         | Haemophilus somnus (strain 2336) (Histophilus somni (strain 2336  | 874 |
| 431 | BOVAI3 | SYA_ACIBY    | Bacteria | alaS_ABAYE2595        | Acinetobacter baumannii (strain AYE)                              | 878 |
| 432 | BOVFU1 | BOVFU1_CLOAI | Bacteria | alaS_CLOAM1696        | Cloacamonas acidaminovorans                                       | 866 |
| 433 | BOVL29 | BOVL29_ACIBS | Bacteria | alaS_ABSDF1433        | Acinetobacter baumannii (strain SDF)                              | 878 |
| 434 | B1AJ08 | SYA_UREP2    | Bacteria | alaS_UPA3_0385        | Ureaplasma parvum serovar 3 (strain ATCC 27815 / 27 / NCTC 117    | 906 |
| 435 | B1BAZ7 | B1BAZ7_CLOBO | Bacteria | alaS_CBC_A0719        | Clostridium botulinum C str. Eklund                               | 879 |
| 436 | B1BJ78 | B1BJ78_CLOPE | Bacteria | alaS_CPC_2024         | Clostridium perfringens C str. JGS1495                            | 879 |
| 437 | B1BXQ9 | B1BXQ9_CLOPE | Bacteria | alaS_AC3_2259         | Clostridium perfringens E str. JGS1987                            | 879 |
| 438 | B1C0S3 | B1C0S3_9FIRM | Bacteria | CLOSPI_00802          | Clostridium spiroforme DSM 1552                                   | 869 |
| 439 | B1C814 | B1C814_9FIRM | Bacteria | ANASTE_00871          | Anaerofustus stercorihominis DSM 17244                            | 874 |
| 440 | B1EGT7 | B1EGT7_9ESCH | Bacteria | alaS_ESCAB7627_1125   | Escherichia albertii TW07627                                      | 876 |
| 441 | B1F6I8 | B1F6I8_BACAN | Bacteria | alaS_BAK_4698         | Bacillus anthracis str. A0389                                     | 880 |
| 442 | B1FLL1 | B1FLL1_9BURK | Bacteria | BamIOP4010DRAFT_4922  | Burkholderia ambifaria IOP40-10                                   | 874 |
| 443 | B1G7V5 | B1G7V5_9BURK | Bacteria | BgramDRAFT_5449       | Burkholderia graminis C4D1M                                       | 890 |
| 444 | B1GQG8 | B1GQG8_BACAN | Bacteria | alaS_BAM_4677         | Bacillus anthracis str. A0465                                     | 880 |
| 445 | B1GZ43 | SYA_UNCTG    | Bacteria | alaS_TGRD_042         | Uncultured termite group 1 bacterium phylotype Rs-D17             | 877 |
| 446 | B1HI80 | B1HI80_BURPS | Bacteria | alaS_BURPSS13_P0295   | Burkholderia pseudomallei S13                                     | 874 |
| 447 | B1HUK4 | SYA_LYSSC    | Bacteria | alaS_Bsph_3873        | Lysinibacillus sphaericus (strain C3-41)                          | 908 |
| 448 | B1I370 | SYA_DESAP    | Bacteria | alaS_Daud_0912        | Desulforudis audaxviator (strain MP104C)                          | 880 |
| 449 | B1ICI3 | SYA_STRP1    | Bacteria | alaS_SPH_1514         | Streptococcus pneumoniae (strain Hungary19A-6)                    | 872 |
| 450 | B1IUG7 | SYA_CLOBK    | Bacteria | alaS_CLD_2001         | Clostridium botulinum (strain Okra / Type B1)                     | 879 |
| 451 | B1IUY2 | SYA_ECOLC    | Bacteria | alaS_EcolC_1015       | Escherichia coli (strain ATCC 8739 / DSM 1576 / Crooks)           | 876 |
| 452 | B1JCG9 | SYA_PSEPW    | Bacteria | alaS_PputW619_3763    | Pseudomonas putida (strain W619)                                  | 874 |
| 453 | B1JJA0 | SYA_YERP     | Bacteria | alaS_YPK_3373         | Yersinia pseudotuberculosis serotype O:3 (strain YPIII)           | 875 |
| 454 | B1K026 | SYA_BURCC    | Bacteria | alaS_BcenmC03_1387    | Burkholderia cenocepacia (strain MC0-3)                           | 874 |
| 455 | B1KPS5 | SYA_SHEWM    | Bacteria | alaS_Swoo_3339        | Shewanella woodyi (strain ATCC 51908 / MS32)                      | 874 |
| 456 | B1KXB7 | SYA_CLOMB    | Bacteria | alaS_CLK_1949         | Clostridium botulinum (strain Loch Maree / Type A3)               | 879 |
| 457 | B1LBS9 | SYA_THESQ    | Bacteria | alaS_TRQ2_1433        | Thermotoga sp. (strain RQ2)                                       | 863 |
| 458 | B1LQ15 | SYA_ECOSM    | Bacteria | alaS_EcSMS35_2820     | Escherichia coli (strain SMS-3-5 / SECEC)                         | 876 |
| 459 | B1M0N0 | SYA_METRJ    | Bacteria | alaS_Mrad2831_5607    | Methylobacterium radiotolerans (strain ATCC 27329 / DSM 1819 / J  | 892 |
| 460 | B1MCF9 | B1MCF9_MYCA9 | Bacteria | MAB_2851c             | Mycobacterium abscessus (strain ATCC 19977 / DSM 44196)           | 891 |
| 461 | B1MXP8 | SYA_LEUCK    | Bacteria | alaS_LCK_00467        | Leuconostoc citreum (strain KM20)                                 | 894 |
| 462 | B1QDX9 | B1QDX9_CLOBO | Bacteria | alaS_CBN_2544         | Clostridium botulinum NCTC 2916                                   | 879 |
| 463 | B1QJK8 | B1QJK8_CLOBO | Bacteria | alaS_CBB_2805         | Clostridium botulinum Bf                                          | 879 |
| 464 | B1QYT8 | B1QYT8_CLOBU | Bacteria | alaS_CBY_2616         | Clostridium butyricum 5521                                        | 879 |
| 465 | B1RAF8 | B1RAF8_CLOPE | Bacteria | alaS_AC1_2268         | Clostridium perfringens B str. ATCC 3626                          | 879 |
| 466 | B1RHS9 | B1RHS9_CLOPE | Bacteria | alaS_AC5_2141         | Clostridium perfringens CPE str. F4969                            | 879 |
| 467 | B1RTJ5 | B1RTJ5_CLOPE | Bacteria | alaS_AC7_2035         | Clostridium perfringens NCTC 8239                                 | 879 |
| 468 | B1RVD5 | B1RVD5_UREPA | Bacteria | alaS_UPA14_G0258      | Ureaplasma parvum serovar 14 str. ATCC 33697                      | 906 |
| 469 | B1RWS0 | B1RWS0_UREPA | Bacteria | alaS_UPA1_G0612       | Ureaplasma parvum serovar 1 str. ATCC 27813                       | 906 |
| 470 | B1RYL7 | B1RYL7_UREUR | Bacteria | alaS_UUR13_0177       | Ureaplasma urealyticum serovar 13 str. ATCC 33698                 | 906 |
| 471 | B1S3J1 | B1S3J1_STRPN | Bacteria | alaS_SP187300_1476    | Streptococcus pneumoniae CDC1873-00                               | 872 |
| 472 | B1SB55 | B1SB55_9BIFI | Bacteria | BIFDEN_02192          | Bifidobacterium dentium ATCC 27678                                | 892 |
| 473 | B1SFF1 | B1SFF1_9STRE | Bacteria | STRINF_01416          | Streptococcus infantarius subsp. infantarius ATCC BAA-102         | 872 |
| 474 | B1TDA3 | B1TDA3_9BURK | Bacteria | BamMEX5DRAFT_5769     | Burkholderia ambifaria MEX-5                                      | 874 |
| 475 | B1UTJ4 | B1UTJ4_BACAN | Bacteria | alaS_BAO_4599         | Bacillus anthracis str. A0174                                     | 880 |
| 476 | B1V3M8 | B1V3M8_CLOPE | Bacteria | alaS_CJD_2357         | Clostridium perfringens D str. JGS1721                            | 879 |
| 477 | B1VA70 | B1VA70_PHYAS | Bacteria | alaS_PA0509           | Phytolasma australiense                                           | 863 |
| 478 | B1VDL4 | SYA_CORU7    | Bacteria | alaS_cu0952           | Corynebacterium urealyticum (strain ATCC 43042 / DSM 7109)        | 888 |
| 479 | B1W3I1 | SYA_STRGG    | Bacteria | alaS_SGR_6034         | Streptomyces griseus subsp. griseus (strain JCM 4626 / NBRC 1335  | 889 |
| 480 | B1WYQ5 | SYA_CYAA5    | Bacteria | alaS_ccc_1722         | Cyanothece sp. (strain ATCC 51142)                                | 879 |
| 481 | B1XCM5 | SYA_ECODH    | Bacteria | alaS_ECDH10B_2865     | Escherichia coli (strain K12 / DH10B)                             | 876 |
| 482 | B1XP68 | SYA_SYNP2    | Bacteria | alaS_SYNPCC7002_A1672 | Synechococcus sp. (strain ATCC 27264 / PCC 7002 / PR-6) (Agmen    | 877 |
| 483 | B1XW08 | B1XW08_POLNS | Bacteria | Pnec_1437             | Polynucleobacter necessarius (strain STIR1)                       | 874 |
| 484 | B1Y1G9 | SYA_LEPCP    | Bacteria | alaS_Lcho_2001        | Leptothrix cholodnii (strain ATCC 51168 / LMG 8142 / SP-6) (Lepto | 875 |
| 485 | B1YJE5 | SYA_EXIS2    | Bacteria | alaS_Exig_2074        | Exiguobacterium sibiricum (strain DSM 17290 / JCM 13490 / 255-1   | 880 |
| 486 | B1YNJ6 | SYA_BURA4    | Bacteria | alaS_BamMC406_1324    | Burkholderia ambifaria (strain MC40-6)                            | 874 |
| 487 | B1ZC90 | SYA_METPB    | Bacteria | alaS_Mpop_2626        | Methylobacterium populi (strain ATCC BAA-705 / NCIMB 13946 / B.   | 891 |
| 488 | B1ZZ40 | SYA_OPITP    | Bacteria | alaS_Oter_3838        | Opitutus terrae (strain DSM 11246 / PB90-1)                       | 937 |
| 489 | B2A5J7 | SYA_NATTJ    | Bacteria | alaS_Nther_1780       | Natranaerobius thermophilus (strain ATCC BAA-1301 / DSM 18059     | 878 |
| 490 | B2D8X1 | B2D8X1_UREPA | Bacteria | alaS_UPA6_A0374       | Ureaplasma parvum serovar 6 str. ATCC 27818                       | 906 |
| 491 | B2DAB4 | B2DAB4_UREUR | Bacteria | alaS_UUR5_E0030       | Ureaplasma urealyticum serovar 5 str. ATCC 27817                  | 906 |
| 492 | B2DKF6 | B2DKF6_STRPN | Bacteria | alaS_SP108700_1403    | Streptococcus pneumoniae CDC1087-00                               | 872 |
| 493 | B2DPP2 | B2DPP2_STRPN | Bacteria | alaS_SP195_1321       | Streptococcus pneumoniae SP195                                    | 872 |
| 494 | B2DT62 | B2DT62_STRPN | Bacteria | alaS_SP28804_1246     | Streptococcus pneumoniae CDC0288-04                               | 872 |
| 495 | B2DYC5 | B2DYC5_STRPN | Bacteria | alaS_SP305906_1321    | Streptococcus pneumoniae CDC3059-06                               | 872 |
| 496 | B2E4S0 | B2E4S0_STRPN | Bacteria | alaS_SPLMV016_1289    | Streptococcus pneumoniae MLV-016                                  | 872 |
| 497 | B2E8P2 | B2E8P2_BIFAN | Bacteria | BIFLAC_02727          | Bifidobacterium animalis subsp. lactis HN019                      | 899 |
| 498 | B2FL33 | SYA_STRMK    | Bacteria | alaS_Smlt1743         | Stenotrophomonas maltophilia (strain K279a)                       | 882 |
| 499 | B2G6F3 | B2G6F3_LACRJ | Bacteria | LAR_0519              | Lactobacillus reuteri (strain JCM 1112)                           | 885 |
| 500 | B2GB25 | B2GB25_LACF3 | Bacteria | LAF_0521              | Lactobacillus fermentum (strain IFO 3956 / LMG 18251)             | 882 |
| 501 | B2GIA1 | SYA_KOCDR    | Bacteria | alaS_KRH_13460        | Kocuria rhizophila (strain ATCC 9341 / DSM 348 / NBRC 103217 / L  | 895 |
| 502 | B2GW07 | B2GW07_BURPS | Bacteria | alaS_BURPS1655_A2121  | Burkholderia pseudomallei 1655                                    | 874 |
| 503 | B2HNC1 | SYA_MYCMM    | Bacteria | alaS_MMAR_2170        | Mycobacterium marinum (strain ATCC BAA-535 / M)                   | 901 |
| 504 | B2HWK7 | SYA_ACIBC    | Bacteria | alaS_ACICU_01154      | Acinetobacter baumannii (strain ACICU)                            | 878 |

|     |        |              |          |                         |                                                                    |     |
|-----|--------|--------------|----------|-------------------------|--------------------------------------------------------------------|-----|
| 505 | B2I6K2 | SYA_XYLF2    | Bacteria | alaS XfasM23_0087       | Xylella fastidiosa (strain M23)                                    | 884 |
| 506 | B2IHX3 | SYA_BEI19    | Bacteria | alaS Bind_2405          | Beijerinckia indica subsp. indica (strain ATCC 9039 / DSM 1715 / N | 898 |
| 506 | B2IQK0 | SYA_STRPS    | Bacteria | alaS SPCG_1372          | Streptococcus pneumoniae (strain CGSP14)                           | 872 |
| 507 | B2J876 | SYA_NOSP7    | Bacteria | alaS Npun_F0562         | Nostoc punctiforme (strain ATCC 29133 / PCC 73102)                 | 880 |
| 508 | B2JK72 | SYA_BURP8    | Bacteria | alaS Bphyt_1613         | Burkholderia phymatum (strain DSM 17167 / STM815)                  | 874 |
| 509 | B2K5X9 | SYA_YERPB    | Bacteria | alaS YPTS_0861          | Yersinia pseudotuberculosis serotype IB (strain PB1/+)             | 875 |
| 510 | B2N1I2 | B2N1I2_ECOLX | Bacteria | alaS Ec53638_3241       | Escherichia coli 53638                                             | 876 |
| 511 | B2NEY8 | B2NEY8_UREUR | Bacteria | alaS UUR7_0385          | Ureaplasma urealyticum serovar 7 str. ATCC 27819                   | 906 |
| 512 | B2NGS7 | B2NGS7_UREUR | Bacteria | alaS UUR11_0378         | Ureaplasma urealyticum serovar 11 str. ATCC 33695                  | 906 |
| 513 | B2NRL1 | B2NRL1_ECO57 | Bacteria | alaS ECH7EC4196_1341    | Escherichia coli O157:H7 str. EC4196                               | 876 |
| 514 | B2P7I1 | B2P7I1_ECO57 | Bacteria | alaS ECH7EC4113_0244    | Escherichia coli O157:H7 str. EC4113                               | 876 |
| 515 | B2PF71 | B2PF71_ECO57 | Bacteria | alaS ECH7EC4076_2889    | Escherichia coli O157:H7 str. EC4076                               | 876 |
| 516 | B2PTZ3 | B2PTZ3_PROST | Bacteria | PROSTU_00005            | Providencia stuartii ATCC 25827                                    | 876 |
| 517 | B2RKK5 | B2RKK5_PORG3 | Bacteria | PGN_1381                | Porphyromonas gingivalis (strain ATCC 33277 / DSM 20709 / JCM 1    | 876 |
| 518 | B2RZT0 | SYA_BORHD    | Bacteria | alaS BH0220             | Borrelia hermsii (strain DAH)                                      | 593 |
| 519 | B2S4Q4 | B2S4Q4_TREPS | Bacteria | alaS TPASS_1017         | Treponema pallidum subsp. pallidum (strain SS14)                   | 605 |
| 520 | B2S647 | B2S647_BRUA1 | Bacteria | BABs19_I11390           | Brucella abortus (strain S19)                                      | 885 |
| 521 | B2SH99 | SYA_FRATM    | Bacteria | alaS FTM_1240           | Francisella tularensis subsp. mediasiatica (strain FSC147)         | 865 |
| 522 | B2SUD0 | SYA_XANOP    | Bacteria | alaS PXO_00147          | Xanthomonas oryzae pv. oryzae (strain PXO99A)                      | 882 |
| 523 | B2SZN0 | SYA_BURPP    | Bacteria | alaS Bphyt_2824         | Burkholderia phytofirmans (strain DSM 17436 / PsJN)                | 874 |
| 524 | B2THN0 | SYA_CLOBB    | Bacteria | alaS CLL_A1174          | Clostridium botulinum (strain Eklund 17B / Type B)                 | 879 |
| 525 | B2U049 | SYA_SHIB3    | Bacteria | alaS SbBS512_E3180      | Shigella boydii serotype 18 (strain CDC 3083-94 / BS512)           | 876 |
| 526 | B2U853 | B2U853_RALPJ | Bacteria | Rpic_0744               | Ralstonia pickettii (strain 12J)                                   | 888 |
| 527 | B2UKT4 | SYA_AKKM8    | Bacteria | alaS Amuc_1383          | Akkermansia muciniphila (strain ATCC BAA-835)                      | 942 |
| 528 | B2V3W2 | SYA_CLOBA    | Bacteria | alaS CLH_1125           | Clostridium botulinum (strain Alaska E43 / Type E3)                | 879 |
| 529 | B2V709 | SYA_SULSY    | Bacteria | alaS SYO3AOP1_0146      | Sulfurihydrogenibium sp. (strain YO3AOP1)                          | 876 |
| 530 | B2VHD4 | B2VHD4_ERWT9 | Bacteria | alaS ETA_26660          | Erwinia tasmaniensis (strain DSM 17950 / Et1/99)                   | 875 |
| 531 | B3A6T6 | B3A6T6_ECO57 | Bacteria | alaS ECH7EC4401_0401    | Escherichia coli O157:H7 str. EC4401                               | 876 |
| 531 | B3ANG7 | B3ANG7_ECO57 | Bacteria | alaS ECH7EC4486_2601    | Escherichia coli O157:H7 str. EC4486                               | 876 |
| 532 | B3B4W5 | B3B4W5_ECO57 | Bacteria | alaS ECH7EC4501_6002    | Escherichia coli O157:H7 str. EC4501                               | 876 |
| 533 | B3BJ78 | B3BJ78_ECO57 | Bacteria | alaS ECH7EC869_3899     | Escherichia coli O157:H7 str. EC869                                | 876 |
| 534 | B3BYJ5 | B3BYJ5_ECO57 | Bacteria | alaS ECH7EC508_4816     | Escherichia coli O157:H7 str. EC508                                | 876 |
| 535 | B3CGP4 | B3CGP4_9BACE | Bacteria | BACINT_04561            | Bacteroides intestinalis DSM 17393                                 | 872 |
| 536 | B3CLK7 | B3CLK7_WOLPP | Bacteria | alaS WP0667             | Wolbachia pipientis subsp. Culex pipiens (strain wPip)             | 860 |
| 537 | B3CST3 | SYA_ORITI    | Bacteria | alaS OTT_0972           | Orientia tsutsugamushi (strain Ikeda) (Rickettsia tsutsugamushi)   | 889 |
| 538 | B3DSE3 | B3DSE3_BIFLD | Bacteria | alaS BLD_0616           | Bifidobacterium longum (strain DJO10A)                             | 893 |
| 539 | B3E044 | SYA_METI4    | Bacteria | alaS Minf_0650          | Methylacidiphilum infernorum (isolate V4) (Methylokorus infernorur | 926 |
| 540 | B3E9Y5 | B3E9Y5_GEOLS | Bacteria | Glov_3154               | Geobacter lovleyi (strain ATCC BAA-1151 / DSM 17278 / SZ)          | 876 |
| 541 | B3EES2 | B3EES2_CHLL2 | Bacteria | Clim_0206               | Chlorobium limicola (strain DSM 245 / NBRC 103803)                 | 888 |
| 542 | B3EL72 | B3EL72_CHLPB | Bacteria | Cphamm1_0330            | Chlorobium phaeobacteroides (strain BS1)                           | 886 |
| 543 | B3ERX7 | B3ERX7_AMOAS | Bacteria | Aasi_0578               | Amoebophilus asiaticus (strain 5a2)                                | 879 |
| 544 | B3H177 | SYA_ACTP7    | Bacteria | alaS APP7_0694          | Actinobacillus pleuropneumoniae serotype 7 (strain AP76)           | 874 |
| 545 | B3HDP3 | B3HDP3_ECOLX | Bacteria | alaS EcB7A_3192         | Escherichia coli B7A                                               | 876 |
| 546 | B3HQ27 | B3HQ27_ECOLX | Bacteria | alaS EcF11_3097         | Escherichia coli F11                                               | 876 |
| 547 | B3I8V2 | B3I8V2_ECOLX | Bacteria | alaS EcE22_0350         | Escherichia coli E22                                               | 876 |
| 548 | B3ILR8 | B3ILR8_ECOLX | Bacteria | alaS EcE110019_0922     | Escherichia coli E110019                                           | 876 |
| 548 | B3J630 | B3J630_BACAN | Bacteria | alaS BATI_4454          | Bacillus anthracis Tsiankovskii-I                                  | 880 |
| 549 | B3JPF2 | B3JPF2_9BACE | Bacteria | BACCOP_03913            | Bacteroides coprocola DSM 17136                                    | 872 |
| 550 | B3PCZ6 | B3PCZ6_CELJU | Bacteria | alaS CJA_1359           | Cellvibrio japonicus (strain Ueda107) (Pseudomonas fluorescens su  | 875 |
| 551 | B3PM69 | B3PM69_MYCA5 | Bacteria | alaS MARTH_orf202       | Mycoplasma arthritidis (strain 158L3-1)                            | 885 |
| 552 | B3PPU3 | B3PPU3_RHIE6 | Bacteria | alaS2_RHECIAT_CH000241  | Rhizobium etli (strain CIAT 652)                                   | 884 |
| 553 | B3QI68 | B3QI68_RHOPT | Bacteria | Rpal_4372               | Rhodopseudomonas palustris (strain TIE-1)                          | 889 |
| 554 | B3QQR2 | B3QQR2_CHLP8 | Bacteria | Cpar_1873               | Chlorobaculum parvum (strain NCIB 8327) (Chlorobium vibrioform     | 885 |
| 555 | B3QVB1 | B3QVB1_CHLT3 | Bacteria | Ctha_0595               | Chloroherpeton thalassium (strain ATCC 35110 / GB-78)              | 887 |
| 556 | B3QZP8 | B3QZP8_PHYMT | Bacteria | alaS ATP_00248          | Phytoplasma mali (strain AT)                                       | 861 |
| 557 | B3R5H0 | B3R5H0_CUPTR | Bacteria | alaS RALTA_A2261        | Cupriavidus taiwanensis (strain R1 / LMG 19424) (Ralstonia taiwan  | 874 |
| 558 | B3WC68 | B3WC68_LACCB | Bacteria | alaS LCABL_08460        | Lactobacillus casei (strain BL23)                                  | 881 |
| 559 | B3WLW8 | B3WLW8_ECOLX | Bacteria | alaS EcB171_0400        | Escherichia coli B171                                              | 876 |
| 560 | B3X0Z5 | B3X0Z5_SHIDY | Bacteria | alaS Sd1012_2461        | Shigella dysenteriae 1012                                          | 876 |
| 561 | B3XHH7 | B3XHH7_ECOLX | Bacteria | alaS EC1011_1707        | Escherichia coli 101-1                                             | 876 |
| 562 | B3XRD2 | B3XRD2_LACRE | Bacteria | Lreu23DRAFT_3594        | Lactobacillus reuteri 100-23                                       | 884 |
| 563 | B3XTJ0 | B3XTJ0_UREUR | Bacteria | alaS UUR9_0614          | Ureaplasma urealyticum serovar 9 str. ATCC 33175                   | 906 |
| 564 | B3XVQ0 | B3XVQ0_UREUR | Bacteria | alaS UUR12_A0380        | Ureaplasma urealyticum serovar 12 str. ATCC 33696                  | 906 |
| 565 | B3YID2 | B3YID2_SALET | Bacteria | alaS SeKA_A2338         | Salmonella enterica subsp. enterica serovar Kentucky str. CVM2918  | 876 |
| 566 | B3YUF3 | B3YUF3_BACCE | Bacteria | alaS BCW_4289           | Bacillus cereus V                                                  | 880 |
| 567 | B3Z821 | B3Z821_BACCE | Bacteria | alaS BC059799_4466      | Bacillus cereus NVH0597-99                                         | 880 |
| 568 | B3ZP03 | B3ZP03_BACCE | Bacteria | alaS BC03BB108_4307     | Bacillus cereus 03BB108                                            | 880 |
| 569 | B4A2F8 | B4A2F8_SALNE | Bacteria | alaS SNSL317_A4212      | Salmonella enterica subsp. enterica serovar Newport str. SL317     | 876 |
| 570 | B4ALT8 | B4ALT8_BACPU | Bacteria | alaS BAT_1561           | Bacillus pumilus ATCC 7061                                         | 878 |
| 571 | B4ATK9 | B4ATK9_FRANO | Bacteria | alaS FTE_1021           | Francisella novicida FTE                                           | 865 |
| 572 | B4BQ41 | B4BQ41_9BACI | Bacteria | G11MC16DRAFT_2530       | Geobacillus sp. G11MC16                                            | 878 |
| 573 | B4D2L0 | B4D2L0_9BACT | Bacteria | CfE428DRAFT_3135        | Chthoniobacter flavus Ellin428                                     | 925 |
| 574 | B4E6Y2 | B4E6Y2_BURCJ | Bacteria | alaS BceJ2315_13830_BCA | Burkholderia cepacia (strain J2315 / LMG 16656) (Burkholderia cen  | 874 |
| 575 | B4EUV7 | B4EUV7_PROMH | Bacteria | alaS PMI0376            | Proteus mirabilis (strain HI4320)                                  | 875 |
| 576 | B4RHE1 | B4RHE1_PHEZH | Bacteria | alaS PHZ_c0987          | Phenylobacterium zucineum (strain HLK1)                            | 880 |
| 577 | B4RIZ0 | B4RIZ0_NEIG2 | Bacteria | NGK_0251                | Neisseria gonorrhoeae (strain NCCP11945)                           | 874 |
| 578 | B4RUJ6 | B4RUJ6_ALTMD | Bacteria | MADE_02846              | Alteromonas macleodii (strain DSM 17117 / Deep ecotype)            | 865 |



|     |        |              |          |                     |                                                                        |     |
|-----|--------|--------------|----------|---------------------|------------------------------------------------------------------------|-----|
| 579 | B4S4B1 | B4S4B1 PROA2 | Bacteria | Paes_0302           | Prosthecochloris aestuarii (strain DSM 271 / SK 413)                   | 885 |
| 580 | B4SG00 | B4SG00 PELPB | Bacteria | Ppha_2668           | Pelodictyon phaeoclathratiforme (strain DSM 5477 / BU-1)               | 888 |
| 581 | B4SRB2 | B4SRB2 STRM5 | Bacteria | Smal_1478           | Stenotrophomonas maltophilia (strain R551-3)                           | 882 |
| 582 | B4T398 | B4T398 SALNS | Bacteria | alaS SNSL254_A3029  | Salmonella newport (strain SL254)                                      | 876 |
| 583 | B4TF11 | B4TF11 SALHS | Bacteria | alaS SeHA_C3013     | Salmonella heidelberg (strain SL476)                                   | 876 |
| 584 | B4TT04 | B4TT04 SALSV | Bacteria | alaS SeSA_A2978     | Salmonella schwarzengrund (strain CVM19633)                            | 876 |
| 585 | B4U215 | B4U215 STREM | Bacteria | alaS Sez_0667       | Streptococcus equi subsp. zooepidemicus (strain MGCS10565)             | 872 |
| 586 | B4U683 | B4U683 HYDS0 | Bacteria | HY04AAS1_1536       | Hydrogenobaculum sp. (strain Y04AAS1)                                  | 856 |
| 587 | B4UET3 | B4UET3 ANASK | Bacteria | AnaeK_3839          | Anaeromyxobacter sp. (strain K)                                        | 905 |
| 588 | B4V668 | B4V668_9ACTO | Bacteria | SSAG_03246          | Streptomyces sp. Mg1                                                   | 889 |
| 589 | B4VYK7 | B4VYK7_9CYAN | Bacteria | MC7420_2633         | Microcoleus chthonoplastes PCC 7420                                    | 877 |
| 590 | B4WFB2 | B4WFB2_9CAUL | Bacteria | BBAL3_723           | Brevundimonas sp. BAL3                                                 | 882 |
| 591 | B4WG64 | B4WG64_9SYNE | Bacteria | S7335_5240          | Synechococcus sp. PCC 7335                                             | 887 |
| 592 | B4X4W0 | B4X4W0_9GAMM | Bacteria | ADG881_1141         | Alcanivorax sp. DG881                                                  | 866 |
| 593 | B5BEN5 | B5BEN5_SALPK | Bacteria | SSPA2499            | Salmonella paratyphi A (strain AKU_12601)                              | 876 |
| 594 | B5BNH1 | B5BNH1_UREUR | Bacteria | alaS UUR4_0548      | Ureaplasma urealyticum serovar 4 str. ATCC 27816                       | 906 |
| 595 | B5BYR1 | B5BYR1_SALET | Bacteria | alaS SeSPA_A3382    | Salmonella enterica subsp. enterica serovar Saintpaul str. SARA23      | 876 |
| 596 | B5CBG6 | B5CBG6_SALET | Bacteria | alaS SeSB_A3145     | Salmonella enterica subsp. enterica serovar Schwarzengrund str. SI     | 876 |
| 597 | B5CM23 | B5CM23_9FIRM | Bacteria | RUMLAC_00497        | Ruminococcus lactaris ATCC 29176                                       | 879 |
| 598 | B5D2F9 | B5D2F9_9BACE | Bacteria | BACPLE_03162        | Bacteroides plebeius DSM 17135                                         | 872 |
| 599 | B5E5P0 | B5E5P0_STRP4 | Bacteria | alaS SPG_1323       | Streptococcus pneumoniae serotype 19F (strain G54)                     | 872 |
| 600 | B5ED08 | B5ED08_GEOBB | Bacteria | Gbem_3633           | Geobacter bemidiensis (strain Bem / ATCC BAA-1014 / DSM 16622)         | 875 |
| 601 | B5EQ49 | B5EQ49_ACIF5 | Bacteria | Lferr_1052          | Acidithiobacillus ferrooxidans (strain ATCC 53993) (Leptospirillum f)  | 877 |
| 602 | B5F350 | B5F350_SALA4 | Bacteria | alaS SeAg_B2946     | Salmonella agona (strain SL483)                                        | 876 |
| 603 | B5FAD1 | B5FAD1_VIBFM | Bacteria | alaS VFJM11_0539    | Vibrio fischeri (strain MJ11)                                          | 859 |
| 604 | B5FSX8 | B5FSX8_SALDC | Bacteria | alaS SeD_A3136      | Salmonella dublin (strain CT_02021853)                                 | 876 |
| 605 | B5GBH3 | B5GBH3_9ACTO | Bacteria | SSBG_01659          | Streptomyces sp. SPB74                                                 | 866 |
| 606 | B5GWY8 | B5GWY8_STRCL | Bacteria | SSCG_03792          | Streptomyces clavuligerus ATCC 27064                                   | 869 |
| 607 | B5HGS9 | B5HGS9_STRPR | Bacteria | SSDG_04363          | Streptomyces pristinaespiralis ATCC 25486                              | 854 |
| 608 | B5I019 | B5I019_9ACTO | Bacteria | SSEG_09621          | Streptomyces svicensis ATCC 29083                                      | 890 |
| 609 | B5I150 | B5I150_9CHRO | Bacteria | alaS CPCC7001_284   | Cyanobium sp. PCC 7001                                                 | 907 |
| 610 | B5IXK7 | B5IXK7_9RHOB | Bacteria | OA307_1828          | Octadecabacter antarcticus 307                                         | 884 |
| 611 | B5JGJ0 | B5JGJ0_9BACT | Bacteria | VDG1235_4053        | Verrucomicrobiae bacterium DG1235                                      | 883 |
| 612 | B5JV98 | B5JV98_9GAMM | Bacteria | alaS GP5015_357     | Gamma proteobacterium HTCC5015                                         | 868 |
| 613 | B5JZH4 | B5JZH4_9RHOB | Bacteria | alaS OA238_1319     | Octadecabacter antarcticus 238                                         | 884 |
| 614 | B5MKA3 | B5MKA3_SALET | Bacteria | alaS SeSPB_A2998    | Salmonella enterica subsp. enterica serovar Saintpaul str. SARA29      | 876 |
| 614 | B5NBF7 | B5NBF7_SALET | Bacteria | alaS SeJ_A3270      | Salmonella enterica subsp. enterica serovar Javiana str. GA_MM04C      | 876 |
| 615 | B5NNK2 | B5NNK2_SALET | Bacteria | alaS SeKB_A2951     | Salmonella enterica subsp. enterica serovar Kentucky str. CDC 191      | 876 |
| 616 | B5PA04 | B5PA04_SALET | Bacteria | alaS SeHB_A2916     | Salmonella enterica subsp. enterica serovar Heidelberg str. SL486      | 876 |
| 617 | B5PGW1 | B5PGW1_SALET | Bacteria | alaS SeW_A3239      | Salmonella enterica subsp. enterica serovar Weltevreden str. HI_NC     | 876 |
| 616 | B5PUL2 | B5PUL2_SALHA | Bacteria | alaS SeH_A3224      | Salmonella enterica subsp. enterica serovar Hadar str. RI_05P066       | 876 |
| 617 | B5Q848 | B5Q848_SALVI | Bacteria | alaS SeV_B2286      | Salmonella enterica subsp. enterica serovar Virchow str. SL491         | 876 |
| 618 | B5QMN1 | B5QMN1_LACRH | Bacteria | LRH_00257           | Lactobacillus rhamnosus HN001                                          | 881 |
| 618 | B5QV76 | B5QV76_SALEP | Bacteria | alaS SEN2668        | Salmonella enteritidis PT4 (strain P125109)                            | 876 |
| 619 | B5RDF2 | B5RDF2_SALG2 | Bacteria | alaS SG2730         | Salmonella gallinarum (strain 287/91 / NCTC 13346)                     | 876 |
| 620 | B5RL45 | B5RL45_BORLD | Bacteria | alaS BDU_221        | Borrelia duttonii (strain Ly)                                          | 592 |
| 619 | B5RR38 | B5RR38_BORRA | Bacteria | alaS BRE_220        | Borrelia recurrentis (strain A1)                                       | 592 |
| 620 | B5S9E7 | B5S9E7_RALSO | Bacteria | alaS RSMK04508      | Ralstonia solanacearum (Pseudomonas solanacearum)                      | 893 |
| 621 | B5SGG1 | B5SGG1_RALSO | Bacteria | alaS RSIPO_02199    | Ralstonia solanacearum IPO1609                                         | 825 |
| 622 | B5UMV7 | B5UMV7_BACCE | Bacteria | alaS BCAH1134_4491  | Bacillus cereus AH1134                                                 | 880 |
| 623 | B5V6D1 | B5V6D1_BACCE | Bacteria | alaS BCH308197_4379 | Bacillus cereus H3081.97                                               | 880 |
| 624 | B5VWU3 | B5VWU3_SPIMA | Bacteria | AmaxDRAFT_0985      | Arthrospira maxima CS-328                                              | 876 |
| 625 | B5WNB0 | B5WNB0_9BURK | Bacteria | BH160DRAFT_4563     | Burkholderia sp. H160                                                  | 874 |
| 626 | B5XM38 | B5XM38_STRPZ | Bacteria | alaS Spy49_1108c    | Streptococcus pyogenes serotype M49 (strain NZ131)                     | 872 |
| 627 | B5XVB8 | B5XVB8_KLEP3 | Bacteria | alaS KPK_1098       | Klebsiella pneumoniae (strain 342)                                     | 875 |
| 628 | B5Y7R1 | B5Y7R1_COPPD | Bacteria | alaS COPRO5265_0443 | Coprothermobacter proteolyticus (strain ATCC 35245 / DSM 5265 /        | 876 |
| 629 | B5YDY5 | B5YDY5_DICT6 | Bacteria | alaS DICTH_0880     | Dictyoglomus thermophilum (strain ATCC 35947 / DSM 3960 / H-6-         | 866 |
| 630 | B5YJG4 | B5YJG4_THEYD | Bacteria | alaS THEYE_A0536    | Thermodesulfobacillus yellowstonii (strain ATCC 51303 / DSM 11347)     | 875 |
| 631 | B5Z2A8 | B5Z2A8_ECO5E | Bacteria | alaS ECH74115_3944  | Escherichia coli O157:H7 (strain EC4115 / EHEC)                        | 876 |
| 632 | B5ZB11 | B5ZB11_UREU1 | Bacteria | alaS UUR10_0378     | Ureaplasma urealyticum serovar 10 (strain ATCC 33699 / Western)        | 906 |
| 633 | B5ZRG1 | B5ZRG1_RHLIW | Bacteria | Rleg2_1957          | Rhizobium leguminosarum bv. trifolii (strain WSM2304)                  | 884 |
| 634 | B6ANE9 | B6ANE9_9BACT | Bacteria | CGL2_10933004       | Leptospirillum sp. Group II '5-way CG'                                 | 891 |
| 635 | B6AYP5 | B6AYP5_9RHOB | Bacteria | alaS RB2083_1533    | Rhodobacteraceae bacterium HTCC2083                                    | 887 |
| 636 | B6BE27 | B6BE27_9RHOB | Bacteria | alaS RBY4I_1692     | Rhodobacteriales bacterium Y4I                                         | 883 |
| 637 | B6BHU3 | B6BHU3_9PROT | Bacteria | alaS CBGD1_773      | Campylobacteriales bacterium GD 1                                      | 849 |
| 638 | B6BSI7 | B6BSI7_9RICK | Bacteria | alaS PB7211_272     | Candidatus Pelagibacter sp. HTCC7211                                   | 888 |
| 639 | B6BWK2 | B6BWK2_9PROT | Bacteria | alaS KB13_1289      | Beta proteobacterium KB13                                              | 873 |
| 640 | B6BZW4 | B6BZW4_9GAMM | Bacteria | NOC27_889           | Nitrosococcus oceani AFC27                                             | 873 |
| 641 | B6ENH9 | B6ENH9_ALISL | Bacteria | alaS VSAL_I0635     | Aliivibrio salmonicida (strain LFI1238) (Vibrio salmonicida (strain LF | 860 |
| 642 | B6FS40 | B6FS40_9CLOT | Bacteria | CLONEX_02964        | Clostridium nexile DSM 1787                                            | 885 |
| 643 | B6FZ95 | B6FZ95_9CLOT | Bacteria | CLOHIR_01199        | Clostridium hiranonis DSM 13275                                        | 911 |
| 644 | B6GCI2 | B6GCI2_9ACTN | Bacteria | COLSTE_01805        | Collinsella stercoris DSM 13279                                        | 884 |
| 645 | B6I683 | B6I683_ECO5E | Bacteria | ECSE_2945           | Escherichia coli (strain SE11)                                         | 876 |
| 646 | B6IS94 | B6IS94_RHOCS | Bacteria | alaS RC1_0900       | Rhodospirillum centenum (strain ATCC 51521 / SW)                       | 898 |
| 647 | B6J044 | B6J044_COXB2 | Bacteria | alaS CbuG_0952      | Coxiella burnetii (strain CbuG_Q212) (Coxiella burnetii (strain Q212   | 865 |
| 648 | B6J6Y9 | B6J6Y9_COXB1 | Bacteria | alaS CbuK_0786      | Coxiella burnetii (strain CbuK_Q154) (Coxiella burnetii (strain Q154   | 865 |
| 649 | B6JBM6 | B6JBM6_OLICO | Bacteria | alaS OCAR_5435      | Oligotropha carboxidovorans (strain ATCC 49405 / DSM 1227 / OM         | 909 |

|     |        |               |          |                         |                                                                              |     |
|-----|--------|---------------|----------|-------------------------|------------------------------------------------------------------------------|-----|
| 650 | B6R0D6 | B6R0D6_9RHOB  | Bacteria | PJE062_4618             | Pseudovibrio sp. JE062                                                       | 551 |
| 651 | B6W0H4 | B6W0H4_9BACE  | Bacteria | BACDOR_03157            | Bacteroides dorei DSM 17855                                                  | 872 |
| 652 | B6W831 | B6W831_9FIRM  | Bacteria | ANHYDRO_00730           | Anaerococcus hydrogenalis DSM 7454                                           | 867 |
| 653 | B6WXJ6 | B6WXJ6_9DELTA | Bacteria | DESPIG_02823            | Desulfovibrio piger ATCC 29098                                               | 889 |
| 654 | B6XAT2 | B6XAT2_9ENTR  | Bacteria | PROVALCAL_00430         | Providencia alcalifaciens DSM 30120                                          | 875 |
| 655 | B6XV65 | B6XV65_9BIFI  | Bacteria | BIFCAT_00972            | Bifidobacterium catenulatum DSM 16992                                        | 892 |
| 656 | B6Y943 | B6Y943_9RICK  | Bacteria | alaS_C1A_246            | Wolbachia endosymbiont of Culex quinquefasciatus JHB                         | 860 |
| 657 | B6YRF8 | B6YRF8_AZOPC  | Bacteria | CFPG_517                | Azobacteroides pseudotrichonymphae genomovar. CFP2                           | 872 |
| 658 | B6ZWC5 | B6ZWC5_ECO57  | Bacteria | alaS_ESCCO14588_5251    | Escherichia coli O157:H7 str. TW14588                                        | 876 |
| 659 | B7A622 | B7A622_THEAQ  | Bacteria | TaqDRAFT_4891           | Thermus aquaticus Y51MC23                                                    | 881 |
| 660 | B7AEH7 | B7AEH7_9BACE  | Bacteria | BACEGG_00798            | Bacteroides eggerthii DSM 20697                                              | 873 |
| 661 | B7ANV3 | B7ANV3_9BACE  | Bacteria | BACPEC_00357            | Bacteroides pectinophilus ATCC 43243                                         | 868 |
| 662 | B7B568 | B7B568_9PORP  | Bacteria | PRABACTJOHN_00161       | Parabacteroides johnsonii DSM 18315                                          | 875 |
| 663 | B7C7P0 | B7C7P0_9FIRM  | Bacteria | EUBIFOR_00188           | Eubacterium bifforme DSM 3989                                                | 876 |
| 664 | B7CU68 | B7CU68_BURPS  | Bacteria | alaS_BUC_2496           | Burkholderia pseudomallei 576                                                | 874 |
| 665 | B7GIT2 | B7GIT2_ANOFW  | Bacteria | alaS_Aflv_0744          | Anoxybacillus flavithermus (strain DSM 21510 / WK1)                          | 877 |
| 666 | B7GSA1 | B7GSA1_BIFLS  | Bacteria | Blon_1602               | Bifidobacterium longum subsp. infantis (strain ATCC 15697 / DSM 2)           | 892 |
| 667 | B7GWX4 | B7GWX4_ACIB3  | Bacteria | alaS_ABBFA_002403       | Acinetobacter baumannii (strain AB307-0294)                                  | 883 |
| 668 | B7HE23 | B7HE23_BACC4  | Bacteria | alaS_BCB4264_A4508      | Bacillus cereus (strain B4264)                                               | 880 |
| 669 | B7HQE6 | B7HQE6_BACC7  | Bacteria | alaS_BCAH187_A4521      | Bacillus cereus (strain AH187)                                               | 880 |
| 670 | B7IAF1 | B7IAF1_ACIB5  | Bacteria | alaS_AB57_1311          | Acinetobacter baumannii (strain AB0057)                                      | 883 |
| 671 | B7IDI3 | B7IDI3_THEAB  | Bacteria | alaS_THA_1622           | Thermosiphon africanus (strain TCF52B)                                       | 859 |
| 672 | B7IYP2 | B7IYP2_BACC2  | Bacteria | alaS_BCG9842_B0728      | Bacillus cereus (strain G9842)                                               | 880 |
| 673 | B7J1F0 | B7J1F0_BORBZ  | Bacteria | BbuZS7_0225             | Borrelia burgdorferi (strain ZS7)                                            | 594 |
| 674 | B7J7B1 | B7J7B1_ACIF2  | Bacteria | alaS_AFE_0934           | Acidithiobacillus ferrooxidans (strain ATCC 23270 / DSM 14882 / NCIMB 13688) | 877 |
| 675 | B7JPX4 | B7JPX4_BACC0  | Bacteria | alaS_BCAH820_4468       | Bacillus cereus (strain AH820)                                               | 880 |
| 676 | B7K4L5 | B7K4L5_CYAP8  | Bacteria | PCC8801_1423            | Cyanospora sp. (strain PCC 8801) (Synechococcus sp. (strain PCC 8801))       | 879 |
| 677 | B7KIE8 | B7KIE8_CYAP7  | Bacteria | PCC7424_0898            | Cyanospora sp. (strain PCC 7424) (Synechococcus sp. (strain ATCC 8774))      | 881 |
| 678 | B7KPS4 | B7KPS4_METC4  | Bacteria | Mchl_2821               | Methylobacterium chloromethanicum (strain CM4 / NCIMB 13688)                 | 891 |
| 679 | B7LEA8 | B7LEA8_ECO55  | Bacteria | alaS_EC55989_2959       | Escherichia coli (strain 55989 / EAEC)                                       | 876 |
| 680 | B7LW32 | B7LW32_ESCF3  | Bacteria | alaS_EFER_0377          | Escherichia fergusonii (strain ATCC 35469 / DSM 13698 / CDC 0568)            | 876 |
| 681 | B7M9D4 | B7M9D4_ECO8A  | Bacteria | alaS_ECIA11_2788        | Escherichia coli O8 (strain IAI1)                                            | 876 |
| 682 | B7MKG6 | B7MKG6_ECO45  | Bacteria | alaS_ECS88_2960         | Escherichia coli O45:K1 (strain S88 / ExPEC)                                 | 876 |
| 683 | B7MYZ4 | B7MYZ4_ECO81  | Bacteria | alaS_ECED1_3146         | Escherichia coli O81 (strain ED1a)                                           | 876 |
| 684 | B7N6S7 | B7N6S7_EC0L0  | Bacteria | alaS_ECUMN_3018         | Escherichia coli O17:K52:H18 (strain UMN026 / ExPEC)                         | 876 |
| 685 | B7NSH7 | B7NSH7_ECO7I  | Bacteria | alaS_ECIAI39_2882       | Escherichia coli O7:K1 (strain IAI39 / ExPEC)                                | 876 |
| 686 | B7QSR9 | B7QSR9_9RHOB  | Bacteria | alaS_RR11_450           | Ruegeria sp. R11                                                             | 883 |
| 687 | B7RH73 | B7RH73_9RHOB  | Bacteria | alaS_RGAI101_2151       | Roseobacter sp. GAI101                                                       | 885 |
| 688 | B7RTN8 | B7RTN8_9GAMM  | Bacteria | alaS_GPB2148_3150       | Marine gamma proteobacterium HTCC2148                                        | 866 |
| 689 | B7UHB5 | B7UHB5_ECO27  | Bacteria | alaS_E2348_C_2960_E2348 | Escherichia coli O127:H6 (strain E2348/69 / EPEC)                            | 876 |
| 690 | B7UY31 | B7UY31_PSEA8  | Bacteria | alaS_PLES_44131         | Pseudomonas aeruginosa (strain LESB58)                                       | 874 |
| 691 | B7VK44 | B7VK44_VIBSL  | Bacteria | VS_2583                 | Vibrio splendidus (strain LGP32) (Vibrio splendidus (strain Mel32))          | 860 |
| 692 | B7WSG5 | B7WSG5_COMTE  | Bacteria | CtesDRAFT_PD2205        | Comamonas testosteroni KF-1                                                  | 874 |
| 693 | B7XSP2 | B7XSP2_BORGA  | Bacteria | BGAPBR_0224             | Borrelia garinii PBr                                                         | 594 |
| 694 | B7XVY0 | B7XVY0_BORGA  | Bacteria | BGAFAR04_0227           | Borrelia garinii Far04                                                       | 594 |
| 695 | B8CJQ7 | B8CJQ7_SHEPW  | Bacteria | swp_1367                | Shewanella piezotolerans (strain WP3 / JCM 13877)                            | 874 |
| 696 | B8D2A5 | B8D2A5_HALOH  | Bacteria | Hore_05750              | Halothermothrix orenii (strain H 168 / OCM 544 / DSM 9562)                   | 876 |
| 697 | B8D7T8 | B8D7T8_BUCAT  | Bacteria | alaS_BUAPTUC7_397       | Buchnera aphidicola subsp. Acyrthosiphon pisum (strain Tuc7)                 | 878 |
| 698 | B8D9I6 | B8D9I6_BUCA5  | Bacteria | alaS_BUAP5A_396         | Buchnera aphidicola subsp. Acyrthosiphon pisum (strain 5A)                   | 878 |
| 699 | B8DE06 | B8DE06_LISMH  | Bacteria | alaS_LMHCC_1065         | Listeria monocytogenes serotype 4a (strain HCC23)                            | 879 |
| 700 | B8DP01 | B8DP01_DESVM  | Bacteria | DvMF_0877               | Desulfovibrio vulgaris (strain Miyazaki F / DSM 19637)                       | 879 |
| 701 | B8E226 | B8E226_DICTD  | Bacteria | Dtur_1023               | Dictyoglomus turgidum (strain Z-1310 / DSM 6724)                             | 865 |
| 702 | B8E8U4 | B8E8U4_SHEB2  | Bacteria | Sbal223_1250            | Shewanella baltica (strain OS223)                                            | 874 |
| 703 | B8ETRO | B8ETRO_METSB  | Bacteria | Msil_3523               | Methylocella silvestris (strain BL2 / DSM 15510 / NCIMB 13906)               | 895 |
| 704 | B8F481 | B8F481_HAEPS  | Bacteria | alaS_HAPS_0465          | Haemophilus parasuis serovar 5 (strain SH0165)                               | 875 |
| 705 | B8FKZ9 | B8FKZ9_DESAA  | Bacteria | Dalk_2944               | Desulfatibacillum alkenivorans (strain AK-01)                                | 875 |
| 706 | B8GC75 | B8GC75_CHLAD  | Bacteria | Cagg_0096               | Chloroflexus aggregans (strain MD-66 / DSM 9485)                             | 894 |
| 707 | B8GQV5 | B8GQV5_THISH  | Bacteria | Tgr7_1289               | Thioalkalivibrio sp. (strain HL-EbGR7)                                       | 865 |
| 708 | B8H069 | B8H069_CAUCN  | Bacteria | CCNA_02612              | Caulobacter crescentus (strain NA1000 / CB15N)                               | 880 |
| 709 | B8H9C0 | B8H9C0_ARTCA  | Bacteria | Achl_2015               | Arthrobacter chlorophenolicus (strain A6 / ATCC 700700 / DSM 12862)          | 898 |
| 710 | B8HUZ9 | B8HUZ9_CYAP4  | Bacteria | Cyan7425_0658           | Cyanospora sp. (strain PCC 7425 / ATCC 29141)                                | 889 |
| 711 | B8I408 | B8I408_CLOCE  | Bacteria | Ccel_2096               | Clostridium cellulolyticum (strain ATCC 35319 / DSM 5812 / JCM 6501)         | 879 |
| 712 | B8IP31 | B8IP31_METNO  | Bacteria | Mnod_5505               | Methylobacterium nodulans (strain ORS2060 / LMG 21967)                       | 886 |
| 713 | B8J368 | B8J368_DESDA  | Bacteria | Ddes_0290               | Desulfovibrio desulfuricans (strain ATCC 27774 / DSM 6949)                   | 892 |
| 714 | B8J8G2 | B8J8G2_ANAD2  | Bacteria | A2cp1_3925              | Anaeromyxobacter dehalogenans (strain 2CP-1 / ATCC BAA-258)                  | 905 |
| 715 | B8K902 | B8K902_VIBPA  | Bacteria | alaS_VPMS16_375         | Vibrio parahaemolyticus 16                                                   | 860 |
| 716 | B8KF69 | B8KF69_9GAMM  | Bacteria | alaS_NOR53_2290         | Gamma proteobacterium NOR5-3                                                 | 867 |
| 717 | B8KY71 | B8KY71_9GAMM  | Bacteria | alaS_NOR51B_2337        | Gamma proteobacterium NOR51-B                                                | 865 |
| 718 | B8L290 | B8L290_9GAMM  | Bacteria | alaS_SSKA14_3194        | Stenotrophomonas sp. SKA14                                                   | 882 |
| 719 | B8ZKN1 | B8ZKN1_STRPJ  | Bacteria | alaS_SPN23F13480        | Streptococcus pneumoniae (strain ATCC 700669 / Spain 23F-1)                  | 872 |
| 720 | B8ZUJ6 | B8ZUJ6_MYCLB  | Bacteria | alaS_MLBr00512          | Mycobacterium leprae (strain Br4923)                                         | 908 |
| 721 | B9AAS9 | B9AAS9_BORBU  | Bacteria | BBU72A_0227             | Borrelia burgdorferi 72a                                                     | 594 |
| 722 | B9BEC1 | B9BEC1_9BURK  | Bacteria | alaS_BURMUCGD1_1961     | Burkholderia multivorans CGD1                                                | 874 |
| 723 | B9BN49 | B9BN49_9BURK  | Bacteria | alaS_BURMUCGD2_2276     | Burkholderia multivorans CGD2                                                | 874 |
| 724 | B9CIJ2 | B9CIJ2_9BURK  | Bacteria | alaS_BURMUCGD2M_2363    | Burkholderia multivorans CGD2M                                               | 874 |
| 725 | B9CP15 | B9CP15_9ACTN  | Bacteria | alaS_ATOMI0001_0216     | Atopobium rimae ATCC 49626                                                   | 882 |
| 726 | B9CUK8 | B9CUK8_STACP  | Bacteria | alaS_STACA0001_2401     | Staphylococcus capitis SK14                                                  | 876 |

|     |         |               |          |                        |                                                                    |     |
|-----|---------|---------------|----------|------------------------|--------------------------------------------------------------------|-----|
| 727 | B9DNH3  | B9DNH3_STACT  | Bacteria | alaS Sca_1230_SCA_1230 | Staphylococcus carnosus (strain TM300)                             | 876 |
| 728 | B9DWF9  | B9DWF9_STRU0  | Bacteria | alaS SUB1230           | Streptococcus uberis (strain ATCC BAA-854 / 0140J)                 | 873 |
| 729 | B9E196  | B9E196_CLOK1  | Bacteria | CKR_1220               | Clostridium kluyveri (strain NBRC 12016)                           | 879 |
| 730 | B9E6Z7  | B9E6Z7_MACCJ  | Bacteria | alaS MCCL_1258         | Macrocooccus caseolyticus (strain JCSC5402)                        | 874 |
| 731 | B9IYF3  | B9IYF3_BACQ   | Bacteria | alaS BCQ_4172          | Bacillus cereus (strain Q1)                                        | 880 |
| 732 | B9JFS6  | B9JFS6_AGRRK  | Bacteria | alaS2 Arad_2617        | Agrobacterium radiobacter (strain K84 / ATCC BAA-868)              | 886 |
| 733 | B9JX55  | B9JX55_AGRVS  | Bacteria | alaS Avi_2557          | Agrobacterium vitis (strain S4 / ATCC BAA-846) (Rhizobium vitis (s | 887 |
| 734 | B9K8T8  | B9K8T8_THENN  | Bacteria | CTN_1195               | Thermotoga neapolitana (strain ATCC 49049 / DSM 4359 / NS-E)       | 864 |
| 735 | B9KHT5  | B9KHT5_ANAMF  | Bacteria | alaS AMF_164           | Anaplasma marginale (strain Florida)                               | 882 |
| 736 | B9KKJ6  | B9KKJ6_RHOSK  | Bacteria | RSKD131_1783           | Rhodobacter sphaeroides (strain KD131 / KCTC 12085)                | 883 |
| 737 | B9KZ15  | B9KZ15_THERP  | Bacteria | alaS trd_0726          | Thermomicrobium roseum (strain ATCC 27502 / DSM 5159 / P-2)        | 878 |
| 738 | B9LH38  | B9LH38_CHLSY  | Bacteria | Chy400_4156            | Chloroflexus aurantiacus (strain ATCC 29364 / DSM 637 / Y-400-fl)  | 894 |
| 739 | B9M368  | B9M368_GEOSF  | Bacteria | Geob_1118              | Geobacter sp. (strain FRC-32)                                      | 876 |
| 740 | B9MJ98  | B9MJ98_ACJET  | Bacteria | Dtpsy_1779             | Acidovorax ebreus (strain TPSY) (Diaphorobacter sp. (strain TPSY)) | 874 |
| 741 | B9MRX7  | B9MRX7_ANATD  | Bacteria | Athe_1331              | Anaerocellum thermophilum (strain DSM 6725 / Z-1320)               | 883 |
| 742 | B9NRH2  | B9NRH2_9RHOB  | Bacteria | alaS RKLH11_793        | Rhodobacteraceae bacterium KLH11                                   | 890 |
| 743 | B9NZB2  | B9NZB2_PROMA  | Bacteria | alaS P9202_1810        | Prochlorococcus marinus str. MIT 9202                              | 886 |
| 744 | B9R0H4  | B9R0H4_9RHOB  | Bacteria | alaS SADFL11_5147      | Labrenzia alexandrii DFL-11                                        | 885 |
| 745 | B9WWQ1  | B9WWQ1_STRSU  | Bacteria | SsuiDRAFT_2500         | Streptococcus suis 89/1591                                         | 872 |
| 746 | B9X3E8  | B9X3E8_BORBU  | Bacteria | BBUW9123_0241          | Borrelia burgdorferi W191-23                                       | 594 |
| 747 | B9X5E0  | B9X5E0_BORBU  | Bacteria | BBU64B_0229            | Borrelia burgdorferi 64b                                           | 594 |
| 748 | B9XID2  | B9XID2_9BACT  | Bacteria | Cflav_PD3363           | Bacterium Ellin514                                                 | 908 |
| 749 | B9YCH0  | B9YCH0_9FIRM  | Bacteria | HOLDEFILI_03531        | Holdemania filiformis DSM 12042                                    | 515 |
| 750 | B9Z519  | B9Z519_9NEIS  | Bacteria | FuraDRAFT_2454         | Lutiella nitroferum 2002                                           | 877 |
| 751 | B9ZW86  | B9ZW86_UREUR  | Bacteria | alaS UUR8_0385         | Ureaplasma urealyticum serovar 8 str. ATCC 27618                   | 906 |
| 752 | COAFW1  | COAFW1_UREUR  | Bacteria | alaS UUR2_0383         | Ureaplasma urealyticum serovar 2 str. ATCC 27814                   | 906 |
| 753 | COAIX9  | COAIX9_BORBU  | Bacteria | BBU118A_0225           | Borrelia burgdorferi 118a                                          | 594 |
| 754 | COAKS7  | COAKS7_BORBU  | Bacteria | BBU94A_0226            | Borrelia burgdorferi 94a                                           | 594 |
| 755 | COAPD2  | COAPD2_9SPIO  | Bacteria | BSV1_0232              | Borrelia sp. SV1                                                   | 594 |
| 756 | COAPR8  | COAPR8_9SPIO  | Bacteria | BSPA14S_0221           | Borrelia spielmanii A14S                                           | 594 |
| 757 | COAXS2  | COAXS2_9ENTR  | Bacteria | PROPEN_02643           | Proteus penneri ATCC 35198                                         | 589 |
| 758 | COB740  | COB740_9FIRM  | Bacteria | COPCOM_00961           | Coprococcus comes ATCC 27758                                       | 855 |
| 759 | COBHB9  | COBHB9_9BACT  | Bacteria | Flav2ADRAFT_1185       | Flavobacteria bacterium MS024-2A                                   | 870 |
| 760 | COBKT0  | COBKT0_9BACT  | Bacteria | Flav3CDRAFT_0907       | Flavobacteria bacterium MS024-3C                                   | 879 |
| 761 | COBT09  | COBT09_9BIFI  | Bacteria | BIFPSEUDO_03528        | Bifidobacterium pseudocatenulatum DSM 20438                        | 892 |
| 762 | COCT3T8 | COCT3T8_9CLOT | Bacteria | CLOHYLEM_06750         | Clostridium hylemonae DSM 15053                                    | 879 |
| 763 | COCIA3  | COCIA3_9FIRM  | Bacteria | RUMHYD_00567           | Blautia hydrogenotrophica DSM 10507                                | 868 |
| 764 | COD0N9  | COD0N9_9CLOT  | Bacteria | CLOSTASPAR_02827       | Clostridium asparagiforme DSM 15981                                | 887 |
| 765 | CODRW9  | CODRW9_EIKCO  | Bacteria | EIKCOROL_00085         | Eikenella corrodens ATCC 23834                                     | 873 |
| 766 | COE2Y7  | COE2Y7_9CORY  | Bacteria | CORMATOL_01349         | Corynebacterium matruchotii ATCC 33806                             | 905 |
| 767 | COEC08  | COEC08_9CLOT  | Bacteria | CLOSTMETH_01377        | Clostridium methylpentosum DSM 5476                                | 879 |
| 768 | COEL90  | COEL90_NEIFL  | Bacteria | NEIFLAOT_00695         | Neisseria flavescens NRL30031/H210                                 | 874 |
| 769 | COETM1  | COETM1_9FIRM  | Bacteria | EUBHAL_00752           | Eubacterium hallii DSM 3353                                        | 867 |
| 770 | COF8J7  | COF8J7_9RICK  | Bacteria | WUni_001650            | Wolbachia endosymbiont of Muscidifurax uniraptor                   | 535 |
| 771 | COFX11  | COFX11_9FIRM  | Bacteria | ROSEINA2194_03291      | Roseburia inulinivorans DSM 16841                                  | 886 |
| 772 | COG6T7  | COG6T7_9RHIZ  | Bacteria | alaS BCETI_3000490     | Brucella ceti str. Cudo                                            | 885 |
| 773 | COGKI5  | COGKI5_9FIRM  | Bacteria | DealDRAFT_2994         | Dethiobacter alkaliphilus AHT 1                                    | 872 |
| 774 | COM9L6  | COM9L6_STRE4  | Bacteria | SEQ_0695               | Streptococcus equi subsp. equi (strain 4047)                       | 872 |
| 775 | COMCT2  | COMCT2_STRS7  | Bacteria | SZO_13300              | Streptococcus equi subsp. zooepidemicus (strain H70)               | 872 |
| 776 | CON1U0  | CON1U0_9GAMM  | Bacteria | alaS MDMS009_307       | Methylophaga thiooxydans DMS010                                    | 858 |
| 777 | COPWM0  | COPWM0_SALPC  | Bacteria | alaS SPC_2868          | Salmonella paratyphi C (strain RKS4594)                            | 876 |
| 778 | COQI89  | COQI89_DESAB  | Bacteria | alaS1 HRM2_27330       | Desulfobacterium autotrophicum (strain ATCC 43914 / DSM 3382 /     | 872 |
| 779 | COQTQ9  | COQTQ9_PERMH  | Bacteria | alaS PERMA_0281        | Persephonella marina (strain DSM 14350 / EX-H1)                    | 878 |
| 780 | COR1G2  | COR1G2_BRAHW  | Bacteria | alaS BHWA1_01478       | Brachyspira hyodysenteriae (strain ATCC 49526 / WA1)               | 867 |
| 781 | COR3S3  | COR3S3_WOLWR  | Bacteria | alaS WRi_008260        | Wolbachia sp. subsp. Drosophila simulans (strain wRi)              | 880 |
| 782 | CORJG8  | CORJG8_BRUMB  | Bacteria | alaS BMEA_A1245        | Brucella melitensis biotype 2 (strain ATCC 23457)                  | 885 |
| 783 | COSXK6  | COSXK6_BORBU  | Bacteria | BBUBOL26_0222          | Borrelia burgdorferi Bol26                                         | 594 |
| 784 | COT1D6  | COT1D6_BORBU  | Bacteria | BBU29805_0234          | Borrelia burgdorferi 29805                                         | 594 |
| 785 | COVK19  | COVK19_9GAMM  | Bacteria | alaS HMPREF0023_1488   | Acinetobacter sp. ATCC 27244                                       | 884 |
| 786 | COVVV0  | COVVV0_9CORY  | Bacteria | alaS HMPREF0294_1958   | Corynebacterium glucuronolyticum ATCC 51867                        | 889 |
| 787 | COW1N2  | COW1N2_9ACTO  | Bacteria | alaS HMPREF0044_1322   | Actinomyces coleocanis DSM 15436                                   | 895 |
| 788 | COW3N6  | COW3N6_9ACTO  | Bacteria | alaS HMPREF0058_0480   | Actinomyces urogenitalis DSM 15434                                 | 904 |
| 789 | COW9Q5  | COW9Q5_9FIRM  | Bacteria | ACDG_00205             | Acidaminococcus sp. D21                                            | 874 |
| 790 | COWL03  | COWL03_9CORY  | Bacteria | alaS HMPREF0276_2139   | Corynebacterium accolens ATCC 49725                                | 896 |
| 791 | COWS24  | COWS24_LACBU  | Bacteria | alaS HMPREF0497_2247   | Lactobacillus buchneri ATCC 11577                                  | 887 |
| 792 | COWX04  | COWX04_LACFE  | Bacteria | alaS HMPREF0511_0655   | Lactobacillus fermentum ATCC 14931                                 | 892 |
| 793 | COX543  | COX543_ENTFA  | Bacteria | alaS HMPREF0348_1628   | Enterococcus faecalis TX0104                                       | 880 |
| 794 | COXLD8  | COXLD8_LACHI  | Bacteria | alaS HMPREF0519_2049   | Lactobacillus hilgardii ATCC 8290                                  | 887 |
| 795 | COXSS2  | COXSS2_9CORY  | Bacteria | alaS HMPREF0298_1492   | Corynebacterium lipophiloflavum DSM 44291                          | 888 |
| 796 | COXVK0  | COXVK0_BURPS  | Bacteria | alaS BUH_2271          | Burkholderia pseudomallei Pakistan 9                               | 874 |
| 797 | COYWQ7  | COYWQ7_LACRE  | Bacteria | alaS HMPREF0535_0222   | Lactobacillus reuteri MM2-3                                        | 884 |
| 798 | COZAS0  | COZAS0_BREBN  | Bacteria | alaS BBR47_19020       | Brevibacillus brevis (strain 47 / JCM 6285 / NBRC 100599)          | 882 |
| 799 | COZZA8  | COZZA8_RHOE4  | Bacteria | alaS RER_29850         | Rhodococcus erythropolis (strain PR4 / NBRC 100887)                | 890 |
| 800 | C1A4D2  | C1A4D2_GEMAT  | Bacteria | alaS GAU_1915          | Gemmatimonas aurantiaca (strain T-27 / DSM 14586 / JCM 11422)      | 928 |
| 801 | C1AF24  | C1AF24_MYCBT  | Bacteria | alaS JTY_2572          | Mycobacterium bovis (strain BCG / Tokyo 172 / ATCC 35737 / TMC     | 904 |
| 802 | C1B4H4  | C1B4H4_RHOOB  | Bacteria | alaS ROP_69160         | Rhodococcus opacus (strain B4)                                     | 890 |
| 803 | C1C7Y3  | C1C7Y3_STRP7  | Bacteria | alaS SP70585_1421      | Streptococcus pneumoniae (strain 70585)                            | 872 |



|     |        |              |          |                      |                                                                |     |
|-----|--------|--------------|----------|----------------------|----------------------------------------------------------------|-----|
| 804 | C1CEX1 | C1CEX1_STRZJ | Bacteria | alaS SPJ_1282        | Streptococcus pneumoniae (strain JJA)                          | 872 |
| 805 | C1CL91 | C1CL91_STRZP | Bacteria | alaS SPP_1402        | Streptococcus pneumoniae (strain P1031)                        | 872 |
| 806 | C1CQX3 | C1CQX3_STRZT | Bacteria | alaS SPT_0891        | Streptococcus pneumoniae (strain Taiwan19F-14)                 | 872 |
| 807 | C1CXW8 | C1CXW8_DEIDV | Bacteria | alaS Deide_19270     | Deinococcus deserti (strain VCD115 / DSM 17065 / LMG 22923)    | 891 |
| 808 | C1D7N4 | C1D7N4_LARHH | Bacteria | syA LHK_01485        | Laribacter hongkongensis (strain HLHK9)                        | 877 |
| 809 | C1DQF9 | C1DQF9_AZOV  | Bacteria | alaS Avin_34460      | Azotobacter vinelandii (strain DJ / ATCC BAA-1303)             | 874 |
| 810 | C1DUS1 | C1DUS1_SULAA | Bacteria | alaS SULAZ_0881      | Sulfurihydrogenibium azorense (strain Az-Fu1 / DSM 15241 / OCM | 875 |
| 811 | C1EST3 | C1EST3_BACC3 | Bacteria | alaS BCA_4500        | Bacillus cereus (strain 03BB102)                               | 880 |
| 812 | C1FTC0 | C1FTC0_CLOBJ | Bacteria | alaS CLM_2871        | Clostridium botulinum (strain Kyoto / Type A2)                 | 879 |
| 813 | C1HJ99 | C1HJ99_9ESCH | Bacteria | ESAG_01694           | Escherichia sp. 3_2_53FAA                                      | 876 |
| 814 | C1HZT1 | C1HZT1_NEIGO | Bacteria | NGAG_01779           | Neisseria gonorrhoeae 1291                                     | 874 |
| 815 | C1I7T1 | C1I7T1_9CLOT | Bacteria | CSBG_01858           | Clostridium sp. 7_2_43FAA                                      | 879 |
| 816 | C1KVF1 | C1KVF1_LISMC | Bacteria | alaS Lm4b_01514      | Listeria monocytogenes serotype 4b (strain Clip81459)          | 879 |
| 817 | C1MAL7 | C1MAL7_9ENTR | Bacteria | CSAG_02529           | Citrobacter sp. 30_2                                           | 875 |
| 818 | C1NCP5 | C1NCP5_9ESCH | Bacteria | ESCG_00067           | Escherichia sp. 1_1_43                                         | 876 |
| 819 | C1PB07 | C1PB07_BACCO | Bacteria | BcoaDRAFT_6319       | Bacillus coagulans 36D1                                        | 881 |
| 820 | C2BDF6 | C2BDF6_9FIRM | Bacteria | alaS HMPREF0072_0376 | Anaerococcus lactolyticus ATCC 51172                           | 872 |
| 821 | C2CED5 | C2CED5_VIBCH | Bacteria | VCG_003478           | Vibrio cholerae 12129(1)                                       | 860 |
| 822 | C2CFN2 | C2CFN2_9FIRM | Bacteria | alaS HMPREF0077_0292 | Anaerococcus tetradius ATCC 35098                              | 870 |
| 823 | C2CPF7 | C2CPF7_CORST | Bacteria | alaS HMPREF0308_1286 | Corynebacterium striatum ATCC 6940                             | 895 |
| 824 | C2D488 | C2D488_LACBR | Bacteria | alaS HMPREF0496_2360 | Lactobacillus brevis subsp. gravesensis ATCC 27305             | 887 |
| 825 | C2D840 | C2D840_9ACTN | Bacteria | alaS HMPREF0091_0672 | Atopobium vaginae DSM 15829                                    | 882 |
| 826 | C2DD44 | C2DD44_ENTFA | Bacteria | alaS HMPREF0349_1154 | Enterococcus faecalis TX1322                                   | 741 |
| 827 | C2DX70 | C2DX70_ECOLX | Bacteria | alaS HMPREF0358_4824 | Escherichia coli 83972                                         | 876 |
| 828 | C2E2R8 | C2E2R8_LACJO | Bacteria | alaS HMPREF0528_0042 | Lactobacillus johnsonii ATCC 33200                             | 892 |
| 829 | C2EG34 | C2EG34_9LACO | Bacteria | alaS HMPREF0545_0606 | Lactobacillus salivarius ATCC 11741                            | 917 |
| 830 | C2ER86 | C2ER86_9LACO | Bacteria | alaS HMPREF0548_2182 | Lactobacillus ultunensis DSM 16047                             | 879 |
| 831 | C2ETU3 | C2ETU3_9LACO | Bacteria | alaS HMPREF0549_0879 | Lactobacillus vaginalis ATCC 49540                             | 884 |
| 832 | C2F7P6 | C2F7P6_LACRE | Bacteria | alaS HMPREF0536_1627 | Lactobacillus reuteri MM4-1A                                   | 884 |
| 833 | C2FDV5 | C2FDV5_LACPA | Bacteria | alaS HMPREF0530_1763 | Lactobacillus paracasei subsp. paracasei ATCC 25302            | 914 |
| 834 | C2FZ84 | C2FZ84_9SPHI | Bacteria | alaS HMPREF0765_2640 | Sphingobacterium spiritivorum ATCC 33300                       | 599 |
| 835 | C2GHX1 | C2GHX1_9CORY | Bacteria | alaS HMPREF0293_1514 | Corynebacterium glucuronolyticum ATCC 51866                    | 889 |
| 836 | C2GNN0 | C2GNN0_LACRE | Bacteria | alaS HMPREF0534_0790 | Lactobacillus reuteri CF48-3A                                  | 895 |
| 837 | C2GTK8 | C2GTK8_BIFLI | Bacteria | alaS HMPREF0175_0355 | Bifidobacterium longum subsp. infantis ATCC 55813              | 893 |
| 838 | C2H5A4 | C2H5A4_ENTFA | Bacteria | alaS HMPREF0345_2342 | Enterococcus faecalis ATCC 29200                               | 880 |
| 839 | C2HAV4 | C2HAV4_ENTFC | Bacteria | alaS HMPREF0352_1336 | Enterococcus faecium TX1330                                    | 880 |
| 840 | C2HMM5 | C2HMM5_LACAC | Bacteria | alaS HMPREF0492_0779 | Lactobacillus acidophilus ATCC 4796                            | 879 |
| 841 | C2HUC1 | C2HUC1_VIBCH | Bacteria | VCA_002823           | Vibrio cholerae bv. albensis VL426                             | 860 |
| 842 | C2I4B4 | C2I4B4_VIBCH | Bacteria | VIF_001364           | Vibrio cholerae TM 11079-80                                    | 860 |
| 843 | C2IK39 | C2IK39_VIBCH | Bacteria | VCC_003680           | Vibrio cholerae RC9                                            | 860 |
| 844 | C2INK4 | C2INK4_VIBCH | Bacteria | VCB_000456           | Vibrio cholerae TMA 21                                         | 860 |
| 845 | C2JEL4 | C2JEL4_VIBCH | Bacteria | VCF_002379           | Vibrio cholerae BX 330286                                      | 860 |
| 846 | C2JIM9 | C2JIM9_ENTFA | Bacteria | alaS HMPREF0346_0340 | Enterococcus faecalis HH22                                     | 880 |
| 847 | C2KCT0 | C2KCT0_9LACO | Bacteria | alaS HMPREF0506_0655 | Lactobacillus crispatus JV-V01                                 | 879 |
| 848 | C2KL66 | C2KL66_LEUMC | Bacteria | alaS HMPREF0555_1382 | Leuconostoc mesenteroides subsp. cremoris ATCC 19254           | 893 |
| 849 | C2KQ02 | C2KQ02_9ACTO | Bacteria | alaS HMPREF0577_0871 | Mobiluncus mulieris ATCC 35243                                 | 894 |
| 850 | C2LMF5 | C2LMF5_PROMI | Bacteria | alaS HMPREF0693_3059 | Proteus mirabilis ATCC 29906                                   | 875 |
| 851 | C2LTP0 | C2LTP0_STRSL | Bacteria | alaS STRSA0001_0597  | Streptococcus salivarius SK126                                 | 872 |
| 852 | C2LY74 | C2LY74_STAHO | Bacteria | alaS STAHO0001_1750  | Staphylococcus hominis SK119                                   | 876 |
| 853 | C2M2M5 | C2M2M5_CAPGI | Bacteria | alaS CAPGI0001_0018  | Capnocytophaga gingivalis ATCC 33624                           | 877 |
| 854 | C2MD45 | C2MD45_9PORP | Bacteria | alaS PORUE0001_0366  | Porphyromonas uenonis 60-3                                     | 872 |
| 855 | C2MR23 | C2MR23_BACCE | Bacteria | bcere0001_40430      | Bacillus cereus m1293                                          | 880 |
| 856 | C2N6Q8 | C2N6Q8_BACCE | Bacteria | bcere0002_42510      | Bacillus cereus ATCC 10876                                     | 880 |
| 857 | C2NN84 | C2NN84_BACCE | Bacteria | bcere0004_41710      | Bacillus cereus BGSC 6E1                                       | 880 |
| 858 | C2P427 | C2P427_BACCE | Bacteria | bcere0005_40080      | Bacillus cereus 172560W                                        | 880 |
| 859 | C2PKJ7 | C2PKJ7_BACCE | Bacteria | bcere0006_41440      | Bacillus cereus MM3                                            | 880 |
| 860 | C2Q184 | C2Q184_BACCE | Bacteria | bcere0007_40840      | Bacillus cereus AH621                                          | 880 |
| 861 | C2QHI0 | C2QHI0_BACCE | Bacteria | bcere0009_41030      | Bacillus cereus R309803                                        | 880 |
| 862 | C2QYP1 | C2QYP1_BACCE | Bacteria | bcere0010_41830      | Bacillus cereus ATCC 4342                                      | 880 |
| 863 | C2RDN0 | C2RDN0_BACCE | Bacteria | bcere0011_41270      | Bacillus cereus m1550                                          | 880 |
| 864 | C2RTI4 | C2RTI4_BACCE | Bacteria | bcere0012_40980      | Bacillus cereus BDRD-ST24                                      | 880 |
| 865 | C2S9C3 | C2S9C3_BACCE | Bacteria | bcere0013_42190      | Bacillus cereus BDRD-ST26                                      | 880 |
| 866 | C2SQL5 | C2SQL5_BACCE | Bacteria | bcere0014_41130      | Bacillus cereus BDRD-ST196                                     | 880 |
| 867 | C2T6E1 | C2T6E1_BACCE | Bacteria | bcere0015_41110      | Bacillus cereus BDRD-Cer4                                      | 880 |
| 868 | C2TMD5 | C2TMD5_BACCE | Bacteria | bcere0016_42140      | Bacillus cereus 95/8201                                        | 880 |
| 869 | C2U2Y8 | C2U2Y8_BACCE | Bacteria | bcere0017_41550      | Bacillus cereus Rock1-3                                        | 880 |
| 870 | C2UJ98 | C2UJ98_BACCE | Bacteria | bcere0018_41050      | Bacillus cereus Rock1-15                                       | 880 |
| 871 | C2V0Y4 | C2V0Y4_BACCE | Bacteria | bcere0019_41580      | Bacillus cereus Rock3-28                                       | 880 |
| 872 | C2VHA0 | C2VHA0_BACCE | Bacteria | bcere0020_40840      | Bacillus cereus Rock3-29                                       | 880 |
| 873 | C2VZ97 | C2VZ97_BACCE | Bacteria | bcere0021_41830      | Bacillus cereus Rock3-42                                       | 791 |
| 874 | C2WCF7 | C2WCF7_BACCE | Bacteria | bcere0022_35250      | Bacillus cereus Rock3-44                                       | 880 |
| 875 | C2WT61 | C2WT61_BACCE | Bacteria | bcere0023_42830      | Bacillus cereus Rock4-2                                        | 880 |
| 876 | C2XH45 | C2XH45_BACCE | Bacteria | bcere0025_40640      | Bacillus cereus F65185                                         | 880 |
| 877 | C2XZM2 | C2XZM2_BACCE | Bacteria | bcere0026_41560      | Bacillus cereus AH603                                          | 880 |
| 878 | C2YFU3 | C2YFU3_BACCE | Bacteria | bcere0027_40690      | Bacillus cereus AH676                                          | 880 |
| 879 | C2YWX3 | C2YWX3_BACCE | Bacteria | bcere0028_40830      | Bacillus cereus AH1271                                         | 880 |
| 880 | C2ZD74 | C2ZD74_BACCE | Bacteria | bcere0029_41390      | Bacillus cereus AH1272                                         | 880 |

|     |        |              |          |                        |                                                                |     |
|-----|--------|--------------|----------|------------------------|----------------------------------------------------------------|-----|
| 881 | C2ZUQ9 | C2ZUQ9 BACCE | Bacteria | bcere0030_41120        | Bacillus cereus AH1273                                         | 880 |
| 882 | C3AB79 | C3AB79 BACMY | Bacteria | bmyco0001_40140        | Bacillus mycoides DSM 2048                                     | 880 |
| 883 | C3AQZ2 | C3AQZ2 BACMY | Bacteria | bmyco0002_36250        | Bacillus mycoides Rock1-4                                      | 880 |
| 884 | C3B8E0 | C3B8E0 BACMY | Bacteria | bmyco0003_37320        | Bacillus mycoides Rock3-17                                     | 880 |
| 885 | C3BQC0 | C3BQC0 9BACI | Bacteria | bpmyx0001_38630        | Bacillus pseudomycoloides DSM 12442                            | 880 |
| 886 | C3C8A8 | C3C8A8 BACTU | Bacteria | bthur0001_43100        | Bacillus thuringiensis serovar tochiensis BGSC 4Y1             | 880 |
| 887 | C3CPG5 | C3CPG5 BACTU | Bacteria | bthur0002_42410        | Bacillus thuringiensis Bt407                                   | 880 |
| 888 | C3D7F8 | C3D7F8 BACTU | Bacteria | bthur0003_42390        | Bacillus thuringiensis serovar thuringiensis str. T01001       | 880 |
| 889 | C3DQK3 | C3DQK3 BACTS | Bacteria | bthur0004_42610        | Bacillus thuringiensis serovar sotto str. T04001               | 880 |
| 890 | C3E8X7 | C3E8X7 BACTU | Bacteria | bthur0005_41220        | Bacillus thuringiensis serovar pakistani str. T13001           | 880 |
| 891 | C3ER02 | C3ER02 BACTK | Bacteria | bthur0006_40420        | Bacillus thuringiensis serovar kurstaki str. T03a001           | 880 |
| 892 | C3F7D8 | C3F7D8 BACTU | Bacteria | bthur0007_42280        | Bacillus thuringiensis serovar monterrey BGSC 4A1              | 880 |
| 893 | C3FQU0 | C3FQU0 BACTB | Bacteria | bthur0008_41930        | Bacillus thuringiensis serovar berliner ATCC 10792             | 880 |
| 894 | C3G8J6 | C3G8J6 BACTU | Bacteria | bthur0009_41540        | Bacillus thuringiensis serovar andalousiensis BGSC 4AW1        | 880 |
| 895 | C3GPC7 | C3GPC7 BACTU | Bacteria | bthur0010_41180        | Bacillus thuringiensis serovar pondicheriensis BGSC 4BA1       | 880 |
| 896 | C3H6M6 | C3H6M6 BACTU | Bacteria | bthur0011_41200        | Bacillus thuringiensis serovar huazhongensis BGSC 4BD1         | 880 |
| 897 | C3HP06 | C3HP06 BACTU | Bacteria | bthur0012_42340        | Bacillus thuringiensis serovar pulsiensis BGSC 4CC1            | 880 |
| 898 | C3I6I7 | C3I6I7 BACTU | Bacteria | bthur0013_43720        | Bacillus thuringiensis IBL 200                                 | 880 |
| 899 | C3IPQ3 | C3IPQ3 BACTU | Bacteria | bthur0014_40840        | Bacillus thuringiensis IBL 4222                                | 880 |
| 900 | C3JBR7 | C3JBR7 9PORP | Bacteria | alaS POREN0001_1803    | Porphyromonas endodontalis ATCC 35406                          | 873 |
| 901 | C3JSR7 | C3JSR7 RHOER | Bacteria | alaS RHOER0001_1207    | Rhodococcus erythropolis SK121                                 | 890 |
| 902 | C3JXY1 | C3JXY1 PSEFS | Bacteria | PFLU_4748              | Pseudomonas fluorescens (strain SBW25)                         | 872 |
| 903 | C3L150 | C3L150 CLOB6 | Bacteria | alaS CLJ_B2794         | Clostridium botulinum (strain 657 / Type Ba4)                  | 879 |
| 904 | C3L5Z4 | C3L5Z4 BACAC | Bacteria | alaS BAMEG_4653        | Bacillus anthracis (strain CDC 684 / NRRL 3495)                | 880 |
| 905 | C3LS35 | C3LS35 VIBCM | Bacteria | alaS VCM66_0503        | Vibrio cholerae serotype O1 (strain M66-2)                     | 860 |
| 906 | C3MD92 | C3MD92 RHISN | Bacteria | alaS1_NGR_c16460       | Rhizobium sp. (strain NGR234)                                  | 887 |
| 907 | C3NW35 | C3NW35 VIBCI | Bacteria | VCD_001060             | Vibrio cholerae serotype O1 (strain MJ-1236)                   | 860 |
| 908 | C3P977 | C3P977 BACAA | Bacteria | alaS BAA_4636          | Bacillus anthracis (strain A0248)                              | 880 |
| 909 | C3PGN2 | C3PGN2 CORA7 | Bacteria | alaS cauri_1393        | Corynebacterium aurimucosum (strain ATCC 700975 / DSM 44827)   | 895 |
| 910 | C3PLZ2 | C3PLZ2 RICAE | Bacteria | alaS RAF_ORF1214       | Rickettsia africae (strain ESF-5)                              | 878 |
| 911 | C3QHI8 | C3QHI8 9BACE | Bacteria | BSAG_03133             | Bacteroides sp. D1                                             | 871 |
| 912 | C3QZN6 | C3QZN6 9BACE | Bacteria | BSCG_04348             | Bacteroides sp. 2_2_4                                          | 872 |
| 913 | C3REP2 | C3REP2 9BACE | Bacteria | BSEG_03642             | Bacteroides dorei 5_1_36/D4                                    | 872 |
| 914 | C3RKU2 | C3RKU2 9FIRM | Bacteria | MBAG_01361             | Coprobacillus sp. D7                                           | 869 |
| 915 | C3WCX2 | C3WCX2_FUSMR | Bacteria | FMAG_01290             | Fusobacterium mortiferum ATCC 9817                             | 866 |
| 916 | C3WK63 | C3WK63 9FUSO | Bacteria | FSAG_01279             | Fusobacterium sp. 2_1_31                                       | 867 |
| 917 | C3WS92 | C3WS92 9FUSO | Bacteria | FSCG_00244             | Fusobacterium sp. 4_1_13                                       | 867 |
| 918 | C3WXS8 | C3WXS8 9FUSO | Bacteria | FSDG_00281             | Fusobacterium sp. 7_1                                          | 867 |
| 919 | C4B3N9 | C4B3N9 BURMA | Bacteria | alaS BMAGB8_0954       | Burkholderia mallei GB8 horse 4                                | 874 |
| 920 | C4EXI1 | C4EXI1 HAEIF | Bacteria | alaS CGSHI7P49H1_03423 | Haemophilus influenzae 7P49H1                                  | 874 |
| 921 | C4F4H3 | C4F4H3 HAEIF | Bacteria | alaS CGSHI6P18H1_03709 | Haemophilus influenzae 6P18H1                                  | 874 |
| 922 | C4F885 | C4F885 9ACTN | Bacteria | COLINT_02255           | Collinsella intestinalis DSM 13280                             | 884 |
| 923 | C4FF74 | C4FF74 9BIFI | Bacteria | BIFANG_02974           | Bifidobacterium angulatum DSM 20098                            | 892 |
| 924 | C4FIL8 | C4FIL8 9AQUI | Bacteria | alaS SULYE_0403        | Sulfurihydrogenibium yellowstonense SS-5                       | 876 |
| 925 | C4FPM1 | C4FPM1_9FIRM | Bacteria | VEIDISOL_00847         | Veillonella dispar ATCC 17748                                  | 871 |
| 926 | C4FTB6 | C4FTB6_9FIRM | Bacteria | GCWU000282_00151       | Catonella morbi ATCC 51271                                     | 881 |
| 927 | C4FYX2 | C4FYX2 ABIDE | Bacteria | GCWU000182_00200       | Abiotrophia defectiva ATCC 49176                               | 888 |
| 928 | C4G984 | C4G984_9FIRM | Bacteria | GCWU000342_00535       | Shuttleworthia satelles DSM 14600                              | 921 |
| 929 | C4GLK0 | C4GLK0 9NEIS | Bacteria | GCWU000324_02571       | Kingella oralis ATCC 51147                                     | 963 |
| 930 | C4H9M8 | C4H9M8 YERPE | Bacteria | alaS YPF_3980          | Yersinia pestis biovar Orientalis str. India 195               | 875 |
| 931 | C4HBU1 | C4HBU1 YERPE | Bacteria | alaS YPH_1197          | Yersinia pestis biovar Orientalis str. PEXU2                   | 875 |
| 932 | C4HZE2 | C4HZE2 YERPE | Bacteria | alaS YPS_4237          | Yersinia pestis Pestoides A                                    | 875 |
| 933 | C4IHK5 | C4IHK5 CLOBU | Bacteria | alaS CLP_2736          | Clostridium butyricum E4 str. BoNT E BL5262                    | 879 |
| 934 | C4IRQ1 | C4IRQ1 BRUAB | Bacteria | alaS BAAA_2000128      | Brucella abortus str. 2308 A                                   | 885 |
| 935 | C4K2W1 | C4K2W1_RICPU | Bacteria | alaS RPR_07495         | Rickettsia peacockii (strain Rustic)                           | 878 |
| 936 | C4K831 | C4K831_HAMD5 | Bacteria | alaS HDEF_0012         | Hamiltonella defensa subsp. Acyrthosiphon pisum (strain 5AT)   | 875 |
| 937 | C4KWD1 | C4KWD1_BURPS | Bacteria | alaS GBP346_A1684      | Burkholderia pseudomallei MSHR346                              | 874 |
| 938 | C4L551 | C4L551_EXISA | Bacteria | EAT1b_2722             | Exiguobacterium sp. (strain ATCC BAA-1283 / AT1b)              | 880 |
| 939 | C4LBP8 | C4LBP8_TOLAT | Bacteria | Tola_2729              | Tolomonas auensis (strain DSM 9187 / TA4)                      | 874 |
| 940 | C4LIV5 | C4LIV5_CORK4 | Bacteria | ckrop_1007             | Corynebacterium kroppenstedtii (strain DSM 44385 / CCUG 35717) | 886 |
| 941 | C4PNR0 | C4PNR0_CHLTZ | Bacteria | alaS CTB_7541          | Chlamydia trachomatis serovar B (strain TZ1A828/OT)            | 875 |
| 942 | C4PQD6 | C4PQD6_CHLTZ | Bacteria | alaS JALI_7541         | Chlamydia trachomatis serovar B (strain Jali20/OT)             | 875 |
| 943 | C4RHM9 | C4RHM9_9ACTO | Bacteria | MCAG_04862             | Micromonospora sp. ATCC 39149                                  | 636 |
| 944 | C4S0P3 | C4S0P3_YERBE | Bacteria | yberc0001_12000        | Yersinia bercovieri ATCC 43970                                 | 875 |
| 945 | C4SIL4 | C4SIL4_YERMO | Bacteria | ymoll0001_41150        | Yersinia mollaretii ATCC 43969                                 | 875 |
| 946 | C4SJK2 | C4SJK2_YERFR | Bacteria | yfred0001_18890        | Yersinia frederiksenii ATCC 33641                              | 875 |
| 947 | C4SWV0 | C4SWV0_YERIN | Bacteria | yinte0001_31310        | Yersinia intermedia ATCC 29909                                 | 875 |
| 948 | C4TS18 | C4TS18_YERKR | Bacteria | ykris0001_12180        | Yersinia kristensenii ATCC 33638                               | 847 |
| 949 | C4U7H3 | C4U7H3_YERAL | Bacteria | yaldo0001_26700        | Yersinia aldovae ATCC 35236                                    | 847 |
| 950 | C4UN38 | C4UN38_YERRU | Bacteria | yrucc0001_32400        | Yersinia ruckeri ATCC 29473                                    | 874 |
| 951 | C4V0A6 | C4V0A6_YERRO | Bacteria | yrohd0001_38770        | Yersinia rohdei ATCC 43380                                     | 846 |
| 952 | C4V2H9 | C4V2H9_9FIRM | Bacteria | alaS HMPREF0908_0723   | Selenomonas flueggei ATCC 43531                                | 890 |
| 953 | C4VNP1 | C4VNP1_9LACO | Bacteria | alaS LACJE0001_1368    | Lactobacillus jensenii 269-3                                   | 878 |
| 954 | C4VTC3 | C4VTC3_9LACO | Bacteria | alaS HMPREF0890_1426   | Lactobacillus gasserii 202-4                                   | 882 |
| 955 | C4WC75 | C4WC75_STAWA | Bacteria | alaS STAWA0001_0750    | Staphylococcus warneri L37603                                  | 876 |
| 956 | C4WK96 | C4WK96_9RHIZ | Bacteria | alaS OINT_1001329      | Ochrobactrum intermedium LMG 3301                              | 885 |
| 957 | C4XCF9 | C4XCF9_KLEPN | Bacteria | alaS KP1_4291          | Klebsiella pneumoniae subsp. pneumoniae NTUH-K2044             | 875 |



|      |        |              |          |                         |                                                                      |     |
|------|--------|--------------|----------|-------------------------|----------------------------------------------------------------------|-----|
| 958  | C4XQT6 | C4XQT6 DESMR | Bacteria | alaS DMR_43290          | Desulfovibrio magneticus (strain ATCC 700980 / DSM 13731 / RS-1)     | 880 |
| 959  | C4YW76 | C4YW76_9RICK | Bacteria | alaS REIS_1725          | Rickettsia endosymbiont of Ixodes scapularis                         | 878 |
| 960  | C4Z054 | C4Z054_EUBE2 | Bacteria | EUBELI_00966            | Eubacterium eligens (strain ATCC 27750 / VPI C15-48)                 | 880 |
| 961  | C4ZAS5 | C4ZAS5_EUBR3 | Bacteria | EUBREC_1836             | Eubacterium rectale (strain ATCC 33656 / VPI 0990)                   | 886 |
| 962  | C4ZPD3 | C4ZPD3_THASP | Bacteria | Tmz1t_1571              | Thauera sp. (strain MZ1T)                                            | 873 |
| 963  | C4ZYU2 | C4ZYU2_ECOWB | Bacteria | alaS BWG_2433           | Escherichia coli (strain K12 / MC4100 / BW2952)                      | 876 |
| 964  | C5A8H5 | C5A8H5_BURGB | Bacteria | bglu_1g22220            | Burkholderia glumae (strain BGR1)                                    | 874 |
| 965  | C5ATF9 | C5ATF9_METEA | Bacteria | alaS MexAM1_META1p2718  | Methylobacterium extorquens (strain ATCC 14718 / DSM 1338 / AM)      | 891 |
| 966  | C5BGH4 | C5BGH4_EDWI9 | Bacteria | NT01EI_3239             | Edwardsiella ictaluri (strain 93-146)                                | 875 |
| 967  | C5BMQ0 | C5BMQ0_TERTT | Bacteria | alaS TERTU_2811         | Teredinibacter turnerae (strain ATCC 39867 / T7901)                  | 866 |
| 968  | C5C5S8 | C5C5S8_BEUC1 | Bacteria | Bcav_2014               | Beutenbergia cavernae (strain ATCC BAA-8 / DSM 12333 / NBRC 10)      | 896 |
| 969  | C5CCG5 | C5CCG5_MICLC | Bacteria | Mlut_12720              | Micrococcus luteus (strain ATCC 4698 / IFO 3333 / NCTC 2665)         | 903 |
| 970  | C5CF31 | C5CF31_KOSOT | Bacteria | Kole_1606               | Kosmotoga olearia (strain TBF 19.5.1)                                | 873 |
| 971  | C5CQU9 | C5CQU9_VARPS | Bacteria | Vapar_3176              | Variovorax paradoxus (strain S110)                                   | 874 |
| 972  | C5D4Z3 | C5D4Z3_GEOWS | Bacteria | GWCH70_2490             | Geobacillus sp. (strain WCH70)                                       | 877 |
| 973  | C5EAN4 | C5EAN4_BIFLI | Bacteria | BLIG_01029              | Bifidobacterium longum subsp. infantis CCUG 52486                    | 893 |
| 974  | C5EUG9 | C5EUG9_9FIRM | Bacteria | CBFG_05375              | Clostridium bacterium 1_7_47FAA                                      | 887 |
| 975  | C5FAD1 | C5FAD1_LACPA | Bacteria | LBPG_02847              | Lactobacillus paracasei subsp. paracasei 8700:2                      | 878 |
| 976  | C5G1N5 | C5G1N5_9LACO | Bacteria | LBJG_00092              | Lactobacillus jensenii 1153                                          | 878 |
| 977  | C5N646 | C5N646_STAA3 | Bacteria | alaS HMPREF0776_2655    | Staphylococcus aureus subsp. aureus USA300_TCH959                    | 877 |
| 978  | C5NF16 | C5NF16_BURMA | Bacteria | alaS BMAPRL20_A0910     | Burkholderia mallei PRL-20                                           | 874 |
| 979  | C5NYK5 | C5NYK5_9BACL | Bacteria | alaS GEMHA0001_0545     | Gemella haemolysans ATCC 10379                                       | 873 |
| 980  | C5PZH7 | C5PZH7_STAAU | Bacteria | alaS HMPREF0774_0607    | Staphylococcus aureus subsp. aureus TCH130                           | 877 |
| 981  | C5Q9N2 | C5Q9N2_STAEP | Bacteria | alaS HMPREF0789_1306    | Staphylococcus epidermidis BCM-HMP0060                               | 876 |
| 982  | C5QT04 | C5QT04_STAEP | Bacteria | alaS HMPREF0793_2360    | Staphylococcus epidermidis M23864:W1                                 | 876 |
| 983  | C5QXM5 | C5QXM5_STAEP | Bacteria | alaS HMPREF0791_1418    | Staphylococcus epidermidis W23144                                    | 876 |
| 984  | C5RD17 | C5RD17_WEIPA | Bacteria | alaS HMPREF0877_1863    | Weissella paramesenteroides ATCC 33313                               | 888 |
| 985  | C5S370 | C5S370_9PAST | Bacteria | alaS AM305_11620        | Actinobacillus minor NM305                                           | 874 |
| 986  | C5T6Y3 | C5T6Y3_ACIDE | Bacteria | AcdelDRAFT_2663         | Acidovorax delafieldii 2AN                                           | 874 |
| 987  | C5THD7 | C5THD7_ZYMMO | Bacteria | ZmobDRAFT_1428          | Zymomonas mobilis subsp. mobilis ATCC 10988                          | 930 |
| 988  | C5TN06 | C5TN06_NEIFL | Bacteria | alaS NEIFL0001_1257     | Neisseria flavescens SK114                                           | 874 |
| 989  | C5UXZ9 | C5UXZ9_CLOBO | Bacteria | alaS CLO_2636           | Clostridium botulinum E1 str. 'BoNT E Beluga'                        | 879 |
| 990  | C5VSA6 | C5VSA6_CLOBO | Bacteria | alaS CLG_B0851          | Clostridium botulinum D str. 1873                                    | 879 |
| 991  | C5VX73 | C5VX73_STRSE | Bacteria | alaS SSU1076            | Streptococcus suis (strain P1/7)                                     | 872 |
| 992  | C5W808 | C5W808_ECOWB | Bacteria | alaS B21_02512          | Escherichia coli (strain B / BL21)                                   | 876 |
| 993  | C5WHR0 | C5WHR0_STRDG | Bacteria | alaS SDEG_1430          | Streptococcus dysgalactiae subsp. equisimilis (strain GGS_124)       | 872 |
| 994  | C5ZEA9 | C5ZEA9_BURPS | Bacteria | alaS BURPS1106B_A0904   | Burkholderia pseudomallei 1106b                                      | 874 |
| 995  | C6A852 | C6A852_BIFLB | Bacteria | alaS Balac_0939         | Bifidobacterium animalis subsp. lactis (strain BI-04 / DGCC2908 / R) | 899 |
| 996  | C6AEB2 | C6AEB2_BARGA | Bacteria | alaS Bgr_12960          | Bartonella grahamii (strain as4aup)                                  | 890 |
| 997  | C6AIRO | C6AIRO_BIFAS | Bacteria | alaS Balat_0939         | Bifidobacterium animalis subsp. lactis (strain DSM 10140 / JCM 106)  | 899 |
| 998  | C6AQK7 | C6AQK7_AGGAN | Bacteria | NT05HA_1789             | Aggregatibacter aphrophilus (strain NJ8700) (Haemophilus aphroph)    | 874 |
| 999  | C6AZP1 | C6AZP1_RHILS | Bacteria | Rleg_2168               | Rhizobium leguminosarum bv. trifolii (strain WSM1325)                | 884 |
| 1000 | C6BES8 | C6BES8_RALP1 | Bacteria | Rpic12D_0814            | Ralstonia pickettii (strain 12D)                                     | 893 |
| 1001 | C6C1J8 | C6C1J8_DESAD | Bacteria | Desal_3122              | Desulfovibrio salexigens (strain ATCC 14822 / DSM 2638 / NCIB 84)    | 880 |
| 1002 | C6CBL9 | C6CBL9_DICDC | Bacteria | Dd703_0998              | Dickeya dadantii (strain Ech703)                                     | 875 |
| 1003 | C6CMT2 | C6CMT2_DICZE | Bacteria | Dd1591_0983             | Dickeya zeae (strain Ech1591)                                        | 875 |
| 1004 | C6D7T8 | C6D7T8_PAESJ | Bacteria | Pjdr2_4346              | Paenibacillus sp. (strain JDR-2)                                     | 877 |
| 1005 | C6DCQ9 | C6DCQ9_PCCPP | Bacteria | PC1_3211                | Pectobacterium carotovorum subsp. carotovorum (strain PC1)           | 875 |
| 1006 | C6DME0 | C6DME0_MYCTK | Bacteria | TBMG_01417              | Mycobacterium tuberculosis (strain KZN 1435 / MDR)                   | 904 |
| 1007 | C6E6X9 | C6E6X9_GEOSM | Bacteria | GM21_3738               | Geobacter sp. (strain M21)                                           | 875 |
| 1008 | C6EJT4 | C6EJT4_ECOBD | Bacteria | alaS ECBD_1028 ECD_0254 | Escherichia coli (strain B / BL21-DE3)                               | 876 |
| 1009 | C6GPH2 | C6GPH2_STRSX | Bacteria | alaS SSUSC84_1109       | Streptococcus suis (strain SC84)                                     | 872 |
| 1010 | C6GXJ9 | C6GXJ9_STRS4 | Bacteria | alaS SSUBM407_0713      | Streptococcus suis (strain BM407)                                    | 872 |
| 1011 | C6HU39 | C6HU39_9BACT | Bacteria | UBAL3_44810104          | Leptospirillum ferrodiazotrophum                                     | 884 |
| 1012 | C6I176 | C6I176_9BACE | Bacteria | BSHG_00884              | Bacteroides sp. 3_2_5                                                | 872 |
| 1013 | C6ILP9 | C6ILP9_9BACE | Bacteria | BSIG_02670              | Bacteroides sp. 1_1_6                                                | 872 |
| 1014 | C6IZT7 | C6IZT7_9BACL | Bacteria | POTG_01664              | Paenibacillus sp. oral taxon 786 str. D14                            | 874 |
| 1015 | C6JAV4 | C6JAV4_9FIRM | Bacteria | RSAG_01071              | Ruminococcus sp. 5_1_39BFAA                                          | 879 |
| 1016 | C6JNK7 | C6JNK7_FUSVA | Bacteria | FVAG_00294              | Fusobacterium varium ATCC 27725                                      | 866 |
| 1017 | C6LLI0 | C6LLI0_9FIRM | Bacteria | BRYFOR_09527            | Marvinbryantia formatexigens DSM 14469                               | 879 |
| 1018 | C6M373 | C6M373_NEISI | Bacteria | NEISICOT_00964          | Neisseria sicca ATCC 29256                                           | 874 |
| 1019 | C6NX53 | C6NX53_9GAMM | Bacteria | ACA_2464                | Acidithiobacillus caldus ATCC 51756                                  | 880 |
| 1020 | C6Q0Y6 | C6Q0Y6_9CLOT | Bacteria | CcarbDRAFT_4703         | Clostridium carboxidivorans P7                                       | 662 |
| 1021 | C6R4R1 | C6R4R1_9MICC | Bacteria | alaS ROTMU0001_1088     | Rothia mucilaginosa ATCC 25296                                       | 895 |
| 1022 | C6RA46 | C6RA46_9CORY | Bacteria | alaS CORTU0001_1465     | Corynebacterium tuberculostearicum SK141                             | 894 |
| 1023 | C6RNV8 | C6RNV8_ACIRA | Bacteria | alaS ACIRA0001_2795     | Acinetobacter radioresistens SK82                                    | 897 |
| 1024 | C6RUW1 | C6RUW1_VIBCH | Bacteria | VCH_000537              | Vibrio cholerae CIRS101                                              | 860 |
| 1025 | C6S855 | C6S855_NEIML | Bacteria | alaS NMO_1423           | Neisseria meningitidis (strain alpha14)                              | 885 |
| 1026 | C6SBA9 | C6SBA9_NEIME | Bacteria | alaS NME_0571           | Neisseria meningitidis alpha153                                      | 885 |
| 1027 | C6SKL8 | C6SKL8_NEIME | Bacteria | alaS NMW_1489           | Neisseria meningitidis alpha275                                      | 885 |
| 1028 | C6SRM2 | C6SRM2_STRMN | Bacteria | SmuNN2025_1338          | Streptococcus mutans serotype c (strain NN2025)                      | 872 |
| 1029 | C6TZN4 | C6TZN4_BURPS | Bacteria | alaS BURPS1710A_2103    | Burkholderia pseudomallei 1710a                                      | 874 |
| 1030 | C6UC46 | C6UC46_ECOWB | Bacteria | alaS ECB_02547          | Escherichia coli (strain B / REL606)                                 | 876 |
| 1031 | C6URM9 | C6URM9_ECOST | Bacteria | alaS ECSP_3644          | Escherichia coli O157:H7 (strain TW14359 / EHEC)                     | 876 |
| 1032 | C6V432 | C6V432_NEORI | Bacteria | alaS NRI_0152           | Neorickettsia risticii (strain Illinois)                             | 848 |
| 1033 | C6VRI1 | C6VRI1_LACPJ | Bacteria | alaS JDM1_1909          | Lactobacillus plantarum (strain JDM1)                                | 880 |
| 1034 | C6VWV7 | C6VWV7_DYAFD | Bacteria | Dfer_5667               | Dyadobacter fermentans (strain ATCC 700827 / DSM 18053 / NS11)       | 886 |

|      |        |              |          |                     |                                                                           |     |
|------|--------|--------------|----------|---------------------|---------------------------------------------------------------------------|-----|
| 1035 | C6W914 | C6W914 ACTMD | Bacteria | Amir_5265           | Actinosynnema mirum (strain ATCC 29888 / DSM 43827 / NBRC 14              | 890 |
| 1036 | C6WY09 | C6WY09 METML | Bacteria | Mmol_1905           | Methylothermobacter mobilis (strain JLW8 / ATCC BAA-1282 / DSM 17540      | 878 |
| 1037 | C6WZD4 | C6WZD4 FLAB3 | Bacteria | FIC_00507           | Flavobacteriaceae bacterium (strain 3519-10)                              | 893 |
| 1038 | C6X7H0 | C6X7H0 METSD | Bacteria | Msip34_2193         | Methylovorus sp. (strain SIP3-4) (Methylothermobacter sp. (strain SIP3-4) | 874 |
| 1039 | C6XHC1 | C6XHC1 LIBAP | Bacteria | alaS CLIBASIA_00380 | Liberibacter asiaticus (strain psy62)                                     | 898 |
| 1040 | C6XLQ5 | C6XLQ5 HIRBI | Bacteria | Hbal_0259           | Hirschia baltica (strain ATCC 49814 / DSM 5838 / IFAM 1418)               | 897 |
| 1041 | C6XZP3 | C6XZP3 PEDHD | Bacteria | Phep_2535           | Pedobacter heparinus (strain ATCC 13125 / DSM 2366 / NCIB 9290            | 900 |
| 1042 | C6YK50 | C6YK50 VIBCH | Bacteria | VchoM_02930         | Vibrio cholerae MO10                                                      | 860 |
| 1043 | C6YQ62 | C6YQ62 FRATT | Bacteria | FTMG_00210          | Francisella tularensis subsp. tularensis MA00-2987                        | 865 |
| 1044 | C6YVH7 | C6YVH7_9GAMM | Bacteria | FTPG_00281          | Francisella philomiragia subsp. philomiragia ATCC 25015                   | 865 |
| 1045 | C6Z4P6 | C6Z4P6 9BACE | Bacteria | BSFG_02057          | Bacteroides sp. 4_3_47FAA                                                 | 872 |
| 1046 | C7BHV7 | C7BHV7 PHOAA | Bacteria | PAU_03211           | Photobacterium asiaticum subsp. asiaticum (strain ATCC 43949 /            | 876 |
| 1047 | C7C771 | C7C771 METED | Bacteria | alaS METDI3331      | Methylobacterium extorquens (strain DSM 5838 / DM4) (Methyloba            | 891 |
| 1048 | C7CT65 | C7CT65 ENTFA | Bacteria | EFAG_01137          | Enterococcus faecalis T1                                                  | 880 |
| 1049 | C7D3W1 | C7D3W1_ENTFA | Bacteria | EFBG_01194          | Enterococcus faecalis T2                                                  | 880 |
| 1050 | C7DF87 | C7DF87_9RHOB | Bacteria | alaS TR2A62_0533    | Thalassiosira sp. R2A62                                                   | 884 |
| 1051 | C7G834 | C7G834_9FIRM | Bacteria | ROSINTL182_06058    | Roseburia intestinalis L1-82                                              | 778 |
| 1052 | C7GYM7 | C7GYM7_9FIRM | Bacteria | GCWU000322_00156    | Eubacterium saphenum ATCC 49989                                           | 878 |
| 1053 | C7H6K7 | C7H6K7_9FIRM | Bacteria | FAEPRAA2165_01940   | Faecalibacterium prausnitzii A2-165                                       | 886 |
| 1054 | C7HU17 | C7HU17_9FIRM | Bacteria | alaS HMPREF078_0768 | Anaerococcus vaginalis ATCC 51170                                         | 870 |
| 1055 | C7INA1 | C7INA1_9CLOT | Bacteria | CpapDRAFT_4184      | Clostridium papyrosolvens DSM 2782                                        | 879 |
| 1056 | C7IVH6 | C7IVH6_THET  | Bacteria | TeCCSD1DRAFT_2287   | Thermoanaerobacter ethanolicus CCSD1                                      | 757 |
| 1057 | C7LCF1 | C7LCF1_BRUMC | Bacteria | alaS BMI_I1212      | Brucella microti (strain CCM 4915)                                        | 885 |
| 1058 | C7LXM0 | C7LXM0_DESBD | Bacteria | Dbac_3181           | Desulfomicrobium baculatum (strain DSM 4028 / VKM B-1378) (De             | 879 |
| 1059 | C7LYT2 | C7LYT2_ACIFD | Bacteria | Afer_0951           | Acidimicrobium ferrooxidans (strain DSM 10331 / JCM 15462 / NBR           | 854 |
| 1060 | C7M4Z2 | C7M4Z2_CAPOD | Bacteria | Coch_0127           | Capnocytophaga ochracea (strain ATCC 27872 / DSM 7271 / JCM 1             | 877 |
| 1061 | C7MD05 | C7MD05_BRAFD | Bacteria | Bfae_16360          | Brachyobacterium faecium (strain ATCC 43885 / DSM 4810 / NCIB 9           | 902 |
| 1062 | C7MMU1 | C7MMU1_CRVCD | Bacteria | Ccur_05100          | Cryptobacterium curtum (strain ATCC 700683 / DSM 15641 / 12-3)            | 878 |
| 1063 | C7MSG4 | C7MSG4_SACVD | Bacteria | Svir_15270          | Saccharomonospora viridis (strain ATCC 15386 / DSM 43017 / JCM            | 888 |
| 1064 | C7N4K1 | C7N4K1_SLAH  | Bacteria | Shel_07800          | Slackia heliotrinireducens (strain ATCC 29202 / DSM 20476 / NCTC          | 889 |
| 1065 | C7NC39 | C7NC39_LEPBD | Bacteria | Lebu_1855           | Leptotrichia buccalis (strain ATCC 14201 / DSM 1135 / JCM 12969)          | 871 |
| 1066 | C7NHC6 | C7NHC6_KYTSD | Bacteria | Ksed_12510          | Kytococcus sedentarius (strain ATCC 14392 / DSM 20547 / CCM 31            | 893 |
| 1067 | C7PFW1 | C7PFW1_CHIPD | Bacteria | Cpin_0446           | Chitinophaga pinensis (strain ATCC 43595 / DSM 2588 / NCIB 118C           | 871 |
| 1068 | C7PVQ4 | C7PVQ4_CATAD | Bacteria | Caci_2378           | Catenulispora acidiphila (strain DSM 44928 / NRRL B-24433 / NBRC          | 889 |
| 1069 | C7QR61 | C7QR61_CYAP0 | Bacteria | Cyan8802_1452       | Cyanothece sp. (strain PCC 8802) (Synechococcus sp. (strain RF-2)         | 879 |
| 1070 | C7R4F0 | C7R4F0_JONDD | Bacteria | Jden_1351           | Jonesia denitrificans (strain ATCC 14870 / DSM 20603 / CIP 55134          | 895 |
| 1071 | C7RC58 | C7RC58_KANKD | Bacteria | Kkor_1438           | Kangia koreensis (strain DSM 16069 / KCTC 12182 / SW-125)                 | 875 |
| 1072 | C7RHK3 | C7RHK3_ANAPD | Bacteria | Apr_0936            | Anaerococcus prevotii (strain ATCC 9321 / DSM 20548 / JCM 6508            | 870 |
| 1073 | C7RMX6 | C7RMX6_ACCPU | Bacteria | CAP2UW1_2047        | Accumulibacter phosphatis (strain UW-1)                                   | 878 |
| 1074 | C7TAL9 | C7TAL9_LACRG | Bacteria | alaS LGG_00767      | Lactobacillus rhamnosus (strain ATCC 53103 / GG)                          | 881 |
| 1075 | C7THB6 | C7THB6_LACRL | Bacteria | alaS LC705_00761    | Lactobacillus rhamnosus (strain Lc 705)                                   | 710 |
| 1076 | C7U779 | C7U779_ENTFA | Bacteria | EFCG_00321          | Enterococcus faecalis T3                                                  | 880 |
| 1077 | C7UGE4 | C7UGE4_ENTFA | Bacteria | EFDG_00387          | Enterococcus faecalis ATCC 4200                                           | 880 |
| 1078 | C7UQ97 | C7UQ97_ENTFA | Bacteria | EFOG_01173          | Enterococcus faecalis X98                                                 | 880 |
| 1079 | C7UVB3 | C7UVB3_ENTFA | Bacteria | EFLG_00447          | Enterococcus faecalis D6                                                  | 880 |
| 1080 | C7V5D0 | C7V5D0_ENTFA | Bacteria | EFMG_00304          | Enterococcus faecalis T11                                                 | 880 |
| 1081 | C7VCC9 | C7VCC9_ENTFA | Bacteria | EFNG_00308          | Enterococcus faecalis CH188                                               | 880 |
| 1082 | C7VNP5 | C7VNP5_ENTFA | Bacteria | EFHG_00530          | Enterococcus faecalis HIP11704                                            | 880 |
| 1083 | C7VW99 | C7VW99_ENTFA | Bacteria | EFKG_01156          | Enterococcus faecalis Fly1                                                | 880 |
| 1084 | C7W2W6 | C7W2W6_ENTFA | Bacteria | EFJG_01096          | Enterococcus faecalis E1Sol                                               | 880 |
| 1085 | C7W9Z5 | C7W9Z5_ENTFA | Bacteria | EFIG_00167          | Enterococcus faecalis JH1                                                 | 880 |
| 1086 | C7WKE0 | C7WKE0_ENTFA | Bacteria | EFEG_00322          | Enterococcus faecalis DS5                                                 | 880 |
| 1087 | C7WNU9 | C7WNU9_ENTFA | Bacteria | EFFG_00931          | Enterococcus faecalis ARO1/DG                                             | 880 |
| 1088 | C7X283 | C7X283_ENTFA | Bacteria | EFGG_01114          | Enterococcus faecalis Merz96                                              | 880 |
| 1089 | C7XDG7 | C7XDG7_9PORP | Bacteria | HMPREF0619_03509    | Parabacteroides sp. D13                                                   | 873 |
| 1090 | C7XLK6 | C7XLK6_9LACO | Bacteria | HMPREF5045_01854    | Lactobacillus crispatus 125-2-CHN                                         | 879 |
| 1091 | C7XMG2 | C7XMG2_9FUSO | Bacteria | HMPREF0946_00182    | Fusobacterium sp. 3_1_36A2                                                | 867 |
| 1092 | C7XWJ9 | C7XWJ9_9LACO | Bacteria | HMPREF0501_01002    | Lactobacillus coleohominis 101-4-CHN                                      | 883 |
| 1093 | C7Y1U7 | C7Y1U7_9LACO | Bacteria | HMPREF0525_01404    | Lactobacillus jensenii 27-2-CHN                                           | 878 |
| 1094 | C7Y3Q5 | C7Y3Q5_9LACO | Bacteria | HMPREF0507_00433    | Lactobacillus crispatus MV-1A-US                                          | 879 |
| 1095 | C7YA54 | C7YA54_ENTFA | Bacteria | EFYG_00309          | Enterococcus faecalis T8                                                  | 880 |
| 1096 | C7ZXK4 | C7ZXK4_STAAU | Bacteria | SAAG_01532          | Staphylococcus aureus subsp. aureus 55/2053                               | 876 |
| 1097 | C8A4M4 | C8A4M4_STAAU | Bacteria | SABG_01617          | Staphylococcus aureus subsp. aureus 65-1322                               | 876 |
| 1098 | C8ACK7 | C8ACK7_STAAU | Bacteria | SACG_02505          | Staphylococcus aureus subsp. aureus 68-397                                | 876 |
| 1099 | C8AIU2 | C8AIU2_STAAU | Bacteria | SADG_01652          | Staphylococcus aureus subsp. aureus E1410                                 | 876 |
| 1100 | C8ASM3 | C8ASM3_STAAU | Bacteria | SAEG_02013          | Staphylococcus aureus subsp. aureus M876                                  | 876 |
| 1101 | C8JU25 | C8JU25_LISMO | Bacteria | LMIG_00964          | Listeria monocytogenes FSL N3-165                                         | 879 |
| 1102 | C8K027 | C8K027_LISMO | Bacteria | LMJG_00413          | Listeria monocytogenes FSL R2-503                                         | 879 |
| 1103 | C8K8Y7 | C8K8Y7_LISMO | Bacteria | LMMG_00469          | Listeria monocytogenes F6900                                              | 879 |
| 1104 | C8KJ75 | C8KJ75_STAAU | Bacteria | alaS SA930_1704     | Staphylococcus aureus 930918-3                                            | 876 |
| 1105 | C8KRD0 | C8KRD0_STAAU | Bacteria | alaS SAD30_1009     | Staphylococcus aureus D30                                                 | 876 |
| 1106 | C8KZ86 | C8KZ86_9PAST | Bacteria | alaS AM202_02795    | Actinobacillus minor 202                                                  | 874 |
| 1107 | C8L138 | C8L138_STAAU | Bacteria | SAFL_01997          | Staphylococcus aureus A5937                                               | 876 |
| 1108 | C8L825 | C8L825_STAAU | Bacteria | SAGG_01462          | Staphylococcus aureus A5948                                               | 876 |
| 1109 | C8LIM8 | C8LIM8_STAAU | Bacteria | SAHG_01340          | Staphylococcus aureus A6224                                               | 876 |
| 1110 | C8LTT5 | C8LTT5_STAAU | Bacteria | SAIG_01179          | Staphylococcus aureus A6300                                               | 876 |
| 1111 | C8M026 | C8M026_STAAU | Bacteria | SAJG_00452          | Staphylococcus aureus A8115                                               | 876 |

|      |        |              |          |                        |                                                                       |     |
|------|--------|--------------|----------|------------------------|-----------------------------------------------------------------------|-----|
| 1112 | C8M7V4 | C8M7V4 STAAU | Bacteria | SAKG_00324             | Staphylococcus aureus A9299                                           | 876 |
| 1113 | C8MF89 | C8MF89 STAAU | Bacteria | SALG_00297             | Staphylococcus aureus A9635                                           | 877 |
| 1114 | C8MJR0 | C8MJR0 STAAU | Bacteria | SAMG_01527             | Staphylococcus aureus A9719                                           | 876 |
| 1115 | C8MUP5 | C8MUP5 STAAU | Bacteria | SANG_01239             | Staphylococcus aureus A9763                                           | 876 |
| 1116 | C8N064 | C8N064 STAAU | Bacteria | SAOG_01459             | Staphylococcus aureus A9781                                           | 876 |
| 1117 | C8N9W4 | C8N9W4_9GAMM | Bacteria | alaS HMPREF0198_1292   | Cardiobacterium hominis ATCC 15826                                    | 876 |
| 1118 | C8NE18 | C8NE18_9LACT | Bacteria | alaS HMPREF0444_0163   | Granulicatella adiacens ATCC 49175                                    | 914 |
| 1119 | C8NP57 | C8NP57_COREF | Bacteria | alaS HMPREF0290_1782   | Corynebacterium efficiens YS-314                                      | 906 |
| 1120 | C8P766 | C8P766_9LACO | Bacteria | alaS HMPREF0494_1160   | Lactobacillus antri DSM 16041                                         | 886 |
| 1121 | C8PCJ4 | C8PCJ4_9LACO | Bacteria | alaS HMPREF0520_0814   | Lactobacillus iners DSM 13335                                         | 906 |
| 1122 | C8PMR5 | C8PMR5_9SPIO | Bacteria | alaS TREVI0001_0684    | Treponema vincentii ATCC 35580                                        | 600 |
| 1123 | C8PWG2 | C8PWG2_9GAMM | Bacteria | alaS ENHAE0001_2116    | Enhydrobacter aerosaccus SK60                                         | 890 |
| 1124 | C8RTE4 | C8RTE4_CORJE | Bacteria | alaS HMPREF0297_1296   | Corynebacterium jeikeium ATCC 43734                                   | 887 |
| 1125 | C8RXV1 | C8RXV1_9RHOB | Bacteria | Rsw2DRAFT_0629         | Rhodobacter sp. SW2                                                   | 882 |
| 1126 | C8SI79 | C8SI79_9RHIZ | Bacteria | MesopDRAFT_1744        | Mesorhizobium opportunistum WSM2075                                   | 888 |
| 1127 | C8T8V3 | C8T8V3_KLEPR | Bacteria | alaS HMPREF0484_4046   | Klebsiella pneumoniae subsp. rhinoscleromatis ATCC 13884              | 875 |
| 1128 | C8TFT9 | C8TFT9_ECO26 | Bacteria | alaS ECO26_3760        | Escherichia coli O26:H11 (strain 11368 / EHEC)                        | 876 |
| 1129 | C8U9C4 | C8U9C4_ECO10 | Bacteria | alaS ECO103_3232       | Escherichia coli O103:H2 (strain 12009 / EHEC)                        | 876 |
| 1130 | C8UEP9 | C8UEP9_ECO1A | Bacteria | alaS ECO111_3415       | Escherichia coli O111:H- (strain 11128 / EHEC)                        | 876 |
| 1131 | C8USB7 | C8USB7_LACRG | Bacteria | LRHM_0744              | Lactobacillus rhamnosus (strain ATCC 53103 / GG)                      | 912 |
| 1132 | C8VZV4 | C8VZV4_DESAS | Bacteria | Dtox_2268              | Desulfotomaculum acetoxidans (strain ATCC 49208 / DSM 771 / VK        | 878 |
| 1133 | C8W9V0 | C8W9V0_ATOPD | Bacteria | Apar_0457              | Atopobium parvulum (strain ATCC 33793 / DSM 20469 / JCM 1030)         | 881 |
| 1134 | C8WBA9 | C8WBA9_ZYMMN | Bacteria | Za10_0445              | Zymomonas mobilis subsp. mobilis (strain NCIB 11163)                  | 890 |
| 1135 | C8WLP7 | C8WLP7_EGGLE | Bacteria | Elen_2555              | Eggerthella lenta (strain ATCC 25559 / DSM 2243 / JCM 9979 / NC       | 878 |
| 1136 | C8WQ93 | C8WQ93_ALIAD | Bacteria | Aaci_2026              | Alicyclobacillus acidocaldarius subsp. acidocaldarius (strain ATCC 27 | 879 |
| 1137 | C8WZY8 | C8WZY8_DESRD | Bacteria | Dret_0311              | Desulfohalobium retbaense (strain DSM 5692)                           | 880 |
| 1138 | C8XD24 | C8XD24_NAKMY | Bacteria | Namu_3297              | Nakamurella multipartita (strain ATCC 700099 / DSM 44233 / JCM        | 891 |
| 1139 | C8ZW28 | C8ZW28_ENTGA | Bacteria | EGBG_00989             | Enterococcus gallinarum EG2                                           | 880 |
| 1140 | C9A8C5 | C9A8C5_ENTCA | Bacteria | ECBG_01005             | Enterococcus casseliflavus EC20                                       | 880 |
| 1141 | C9AEU3 | C9AEU3_ENTFC | Bacteria | EFVG_00946             | Enterococcus faecium Com12                                            | 880 |
| 1142 | C9ANL7 | C9ANL7_ENTFC | Bacteria | EFWG_00969             | Enterococcus faecium Com15                                            | 880 |
| 1143 | C9AWG1 | C9AWG1_ENTCA | Bacteria | EGAG_00989             | Enterococcus casseliflavus EC30                                       | 880 |
| 1144 | C9B5S0 | C9B5S0_ENTFC | Bacteria | EFRG_00965             | Enterococcus faecium 1,231,501                                        | 880 |
| 1145 | C9BBZ6 | C9BBZ6_ENTFC | Bacteria | EFSG_01049             | Enterococcus faecium 1,141,733                                        | 880 |
| 1146 | C9BJ78 | C9BJ78_ENTFC | Bacteria | EFQG_00138             | Enterococcus faecium 1,231,502                                        | 880 |
| 1147 | C9BST1 | C9BST1_ENTFC | Bacteria | EFUG_00311             | Enterococcus faecium 1,231,408                                        | 819 |
| 1148 | C9C158 | C9C158_ENTFC | Bacteria | EFTG_00355             | Enterococcus faecium 1,231,410                                        | 880 |
| 1149 | C9C9D5 | C9C9D5_ENTFC | Bacteria | FFPG_00301             | Enterococcus faecium 1,230,933                                        | 880 |
| 1150 | C9CJT1 | C9CJT1_ENTCA | Bacteria | ECAG_00995             | Enterococcus casseliflavus EC10                                       | 880 |
| 1151 | C9D4H7 | C9D4H7_9RHOB | Bacteria | alaS SCH4B_4703        | Silicibacter sp. TrichCH4B                                            | 903 |
| 1152 | C9KKZ3 | C9KKZ3_9FIRM | Bacteria | MITSMUL_03844          | Mitsuokella multacida DSM 20544                                       | 871 |
| 1153 | C9KSR4 | C9KSR4_9BACE | Bacteria | BACFIN_05347           | Bacteroides finegoldii DSM 17565                                      | 872 |
| 1154 | C9L6A1 | C9L6A1_RUMHA | Bacteria | BLAHAN_04908           | Blautia hansenii DSM 20583                                            | 892 |
| 1155 | C9LJS4 | C9LJS4_9BACT | Bacteria | GCWU000325_02488       | Prevotella tannerae ATCC 51259                                        | 874 |
| 1156 | C9LLS2 | C9LLS2_9FIRM | Bacteria | GCWU000321_00453       | Dialister invisus DSM 15470                                           | 868 |
| 1157 | C9LTR4 | C9LTR4_9FIRM | Bacteria | SELSPUOL_01075         | Selenomonas sputigena ATCC 35185                                      | 871 |
| 1158 | C9M3L7 | C9M3L7_LACHE | Bacteria | alaS HMPREF0518_1623   | Lactobacillus helveticus DSM 20075                                    | 879 |
| 1159 | C9M534 | C9M534_9BACT | Bacteria | GCWU000246_00061       | Jonquetella anthropi E3_33_E1                                         | 879 |
| 1160 | C9MAC2 | C9MAC2_HAEIF | Bacteria | HIAG_00065             | Haemophilus influenzae NT127                                          | 874 |
| 1161 | C9MFK7 | C9MFK7_HAEIF | Bacteria | HICG_00091             | Haemophilus influenzae RdAW                                           | 874 |
| 1162 | C9MM97 | C9MM97_9BACT | Bacteria | HMPREF0973_00727       | Prevotella veroralis F0319                                            | 888 |
| 1163 | C9N1E8 | C9N1E8_9FUSO | Bacteria | GCWU000323_02669       | Leptotrichia hofstadii F0254                                          | 871 |
| 1164 | C9P2H7 | C9P2H7_VIBME | Bacteria | VIB_002005             | Vibrio metschnikovii CIP 69.14                                        | 860 |
| 1165 | C9P9I4 | C9P9I4_VIBFU | Bacteria | VFA_000249             | Vibrio furnissii CIP 102972                                           | 860 |
| 1166 | C9PNY8 | C9PNY8_9PAST | Bacteria | alaS HMPREF0621_0720   | Pasteurella dagmatis ATCC 43325                                       | 874 |
| 1167 | C9PXZ4 | C9PXZ4_9BACT | Bacteria | alaS HMPREF6745_1817   | Prevotella sp. oral taxon 472 str. F0295                              | 873 |
| 1168 | C9Q2M5 | C9Q2M5_9VIBR | Bacteria | VCJ_000361             | Vibrio sp. RC341                                                      | 860 |
| 1169 | C9QMF6 | C9QMF6_VIBOR | Bacteria | VIA_003974             | Vibrio orientalis CIP 102891                                          | 860 |
| 1170 | C9R0V2 | C9R0V2_ECOD1 | Bacteria | alaS EcdH1_0992_ECDH1M | Escherichia coli (strain ATCC 33849 / DSM 4235 / NCIB 12045 / K1      | 876 |
| 1171 | C9R2M1 | C9R2M1_AGGAD | Bacteria | D11S_0655              | Aggregatibacter actinomycetemcomitans serotype C (strain D11S-1       | 874 |
| 1172 | C9R8B1 | C9R8B1_AMMDK | Bacteria | Adeg_1440              | Ammonifex degensii (strain DSM 10501 / KC4)                           | 874 |
| 1173 | C9RPI0 | C9RPI0_FIBSS | Bacteria | Fisuc_1039             | Fibrobacter succinogenes (strain ATCC 19169 / S85)                    | 882 |
| 1174 | C9RUS5 | C9RUS5_GEOSY | Bacteria | GYMC61_0962            | Geobacillus sp. (strain Y412MC61)                                     | 878 |
| 1175 | C9T6T2 | C9T6T2_9RHIZ | Bacteria | BAIG_02617             | Brucella ceti M644/93/1                                               | 885 |
| 1176 | C9TH51 | C9TH51_9RHIZ | Bacteria | BAJG_02993             | Brucella ceti M13/05/1                                                | 723 |
| 1177 | C9TLC7 | C9TLC7_9RHIZ | Bacteria | BAGG_01238             | Brucella pinnipedialis M163/99/10                                     | 885 |
| 1178 | C9TWB9 | C9TWB9_9RHIZ | Bacteria | BAHG_01483             | Brucella pinnipedialis B2/94                                          | 885 |
| 1179 | C9U439 | C9U439_BRUAB | Bacteria | BAAG_02609             | Brucella abortus bv. 6 str. 870                                       | 885 |
| 1180 | C9UD40 | C9UD40_BRUAB | Bacteria | BABG_02604             | Brucella abortus bv. 4 str. 292                                       | 885 |
| 1181 | C9UML5 | C9UML5_BRUAB | Bacteria | BACG_02630             | Brucella abortus bv. 3 str. Tulya                                     | 885 |
| 1182 | C9UYM2 | C9UYM2_BRUAB | Bacteria | BADG_01493             | Brucella abortus bv. 2 str. 86/8/59                                   | 885 |
| 1183 | C9VB04 | C9VB04_BRUNE | Bacteria | BANG_01477             | Brucella neotomae 5K33                                                | 885 |
| 1184 | C9VKG5 | C9VKG5_9RHIZ | Bacteria | BAQG_01445             | Brucella ceti B1/94                                                   | 885 |
| 1185 | C9VTS8 | C9VTS8_BRUAB | Bacteria | BARG_02569             | Brucella abortus bv. 9 str. C68                                       | 885 |
| 1186 | C9WYC3 | C9WYC3_NEIM8 | Bacteria | alaS NMV_0785          | Neisseria meningitidis serogroup C (strain 8013)                      | 874 |
| 1187 | C9XEL3 | C9XEL3_SALTD | Bacteria | STMMW_27891            | Salmonella typhimurium (strain D23580)                                | 876 |
| 1188 | C9XP11 | C9XP11_CLODC | Bacteria | alaS CD196_1144        | Clostridium difficile (strain CD196)                                  | 879 |



|      |         |               |          |                      |                                                                                     |     |
|------|---------|---------------|----------|----------------------|-------------------------------------------------------------------------------------|-----|
| 1189 | C9XYZ2  | C9XYZ2 CROTZ  | Bacteria | alaS Ctu_32920       | <i>Cronobacter turicensis</i> (strain DSM 18703 / LMG 23827 / z3032)                | 875 |
| 1190 | C9YFV4  | C9YFV4 9BURK  | Bacteria | alaS Csp_B16540      | <i>Curvibacter putative symbiont of Hydra magnipapillata</i>                        | 878 |
| 1191 | C9YKM0  | C9YKM0 CLODR  | Bacteria | alaS CDR20291_1122   | <i>Clostridium difficile</i> (strain R20291)                                        | 879 |
| 1192 | C9Z659  | C9Z659 STRSW  | Bacteria | alaS SCAB_75061      | <i>Streptomyces scabies</i> (strain 87.22) ( <i>Streptomyces scabiei</i> )          | 890 |
| 1193 | D0AF66  | D0AF66_ENTFC  | Bacteria | EFZG_00312           | <i>Enterococcus faecium</i> TC 6                                                    | 880 |
| 1194 | D0AMR1  | D0AMR1_ENTFC  | Bacteria | EFXG_00692           | <i>Enterococcus faecium</i> C68                                                     | 880 |
| 1195 | D0AZZ2  | D0AZZ2 BRUAB  | Bacteria | BAUG_2457            | <i>Brucella abortus</i> NCTC 8038                                                   | 885 |
| 1196 | D0B952  | D0B952 BRUME  | Bacteria | BAWG_2760            | <i>Brucella melitensis</i> bv. 1 str. 16M                                           | 885 |
| 1197 | D0BAU5  | D0BAU5 BRUSU  | Bacteria | BAVG_0386            | <i>Brucella suis</i> bv. 4 str. 40                                                  | 885 |
| 1198 | D0BKS3  | D0BKS3_9LACT  | Bacteria | HMPREF0446_00558     | <i>Granulicatella elegans</i> ATCC 700633                                           | 881 |
| 1199 | D0BPQ3  | D0BPQ3_9FUSO  | Bacteria | HMPREF0406_00237     | <i>Fusobacterium</i> sp. 3_1_33                                                     | 867 |
| 1200 | D0BYI1  | D0BYI1_9GAMM  | Bacteria | HMPREF0014_01192     | <i>Acinetobacter</i> sp. RUH2624                                                    | 883 |
| 1201 | D0CEF9  | D0CEF9_ACIBA  | Bacteria | HMPREF0010_03139     | <i>Acinetobacter baumannii</i> ATCC 19606                                           | 883 |
| 1202 | D0CN13  | D0CN13_9SYNE  | Bacteria | alaS SH8109_0675     | <i>Synechococcus</i> sp. WH 8109                                                    | 889 |
| 1203 | D0CQU3  | D0CQU3_9RHOB  | Bacteria | alaS SL1157_2904     | <i>Silicibacter lacuscaerulensis</i> ITI-1157                                       | 890 |
| 1204 | D0D3B3  | D0D3B3_9RHOB  | Bacteria | alaS CSE45_2155      | <i>Citricella</i> sp. SE45                                                          | 906 |
| 1205 | D0DJN6  | D0DJN6_9LACO  | Bacteria | HMPREF0508_01835     | <i>Lactobacillus crispatus</i> MV-3A-US                                             | 879 |
| 1206 | D0DQ41  | D0DQ41_9LACO  | Bacteria | HMPREF0527_01410     | <i>Lactobacillus jensenii</i> SJ-7A-US                                              | 878 |
| 1207 | D0DUR1  | D0DUR1_LACFE  | Bacteria | HMPREF0513_01400     | <i>Lactobacillus fermentum</i> 28-3-CHN                                             | 882 |
| 1208 | D0DZN4  | D0DZN4_9LACO  | Bacteria | HMPREF0974_01243     | <i>Lactobacillus jensenii</i> 115-3-CHN                                             | 878 |
| 1209 | D0FV78  | D0FV78_ERWPY  | Bacteria | alaS EpC_27920       | <i>Erwinia pyrifoliae</i>                                                           | 876 |
| 1210 | D0GEU3  | D0GEU3_BRUME  | Bacteria | BASG_01297           | <i>Brucella melitensis</i> bv. 2 str. 63/9                                          | 885 |
| 1211 | D0GKX1  | D0GKX1_9FUSO  | Bacteria | alaS HMPREF0554_0459 | <i>Leptotrichia goodfellowii</i> F0264                                              | 870 |
| 1212 | D0GTI8  | D0GTI8_VIBMI  | Bacteria | VII_003196           | <i>Vibrio mimicus</i> MB451                                                         | 860 |
| 1213 | D0H9A9  | D0H9A9_VIBCH  | Bacteria | VIJ_003114           | <i>Vibrio cholerae</i> RC27                                                         | 860 |
| 1214 | D0HXB5  | D0HXB5_VIBMI  | Bacteria | VMA_000468           | <i>Vibrio mimicus</i> VM223                                                         | 860 |
| 1215 | D0HKI0  | D0HKI0_VIBCH  | Bacteria | VIG_000218           | <i>Vibrio cholerae</i> INDRE 91/1                                                   | 873 |
| 1216 | D0HUI5  | D0HUI5_VIBCH  | Bacteria | VIH_000019           | <i>Vibrio cholerae</i> CT 5369-93                                                   | 781 |
| 1217 | D0I4I5  | D0I4I5_VIBHO  | Bacteria | VHA_000650           | <i>Grimontia hollisae</i> CIP 101886                                                | 860 |
| 1218 | D0IDL7  | D0IDL7_9VIBR  | Bacteria | VOA_003300           | <i>Vibrio</i> sp. RC586                                                             | 860 |
| 1219 | D0IWI7  | D0IWI7_COMT2  | Bacteria | CtCNB1_2400          | <i>Comamonas testosteroni</i> (strain CNB-2)                                        | 834 |
| 1220 | D0J8K8  | D0J8K8_BLASP  | Bacteria | alaS BPLAN_043       | <i>Blattabacterium</i> sp. subsp. <i>Periplaneta americana</i> (strain BPLAN) (F    | 887 |
| 1221 | D0JBR0  | D0JBR0_BLASB  | Bacteria | alaS BLBBGE_598      | <i>Blattabacterium</i> sp. subsp. <i>Blattella germanica</i> (strain Bge) (Blattel  | 887 |
| 1222 | D0JGM7  | D0JGM7_YERPD  | Bacteria | alaS YPD4_2895       | <i>Yersinia pestis</i> (strain D106004)                                             | 847 |
| 1223 | D0JR37  | D0JR37_YERP1  | Bacteria | alaS YPD8_2891       | <i>Yersinia pestis</i> (strain D182038)                                             | 847 |
| 1224 | D0K5J7  | D0K5J7_STAAD  | Bacteria | alaS SAAV_1610       | <i>Staphylococcus aureus</i> (strain ED98)                                          | 876 |
| 1225 | D0KJ89  | D0KJ89_PECWW  | Bacteria | Pecwa_1116           | <i>Pectobacterium wasabiae</i> (strain WPP163)                                      | 875 |
| 1226 | D0KXP7  | D0KXP7_HALNC  | Bacteria | Hneap_0357           | <i>Halothiobacillus neapolitanus</i> (strain ATCC 23641 / c2) ( <i>Thiobacillus</i> | 872 |
| 1227 | D0LCP4  | D0LCP4_GORB4  | Bacteria | Gbro_2320            | <i>Gordonia bronchialis</i> (strain ATCC 25592 / DSM 43247 / JCM 3198)              | 900 |
| 1228 | D0MIY9  | D0MIY9_RHOM4  | Bacteria | Rmar_1560            | <i>Rhodothermus marinus</i> (strain ATCC 43812 / DSM 4252 / R-10) (R)               | 953 |
| 1229 | D0PDG3  | D0PDG3_BRUSU  | Bacteria | BAEG_01495           | <i>Brucella suis</i> bv. 5 str. 513                                                 | 885 |
| 1230 | D0PKS1  | D0PKS1_BRUSU  | Bacteria | BAFG_02600           | <i>Brucella suis</i> bv. 3 str. 686                                                 | 885 |
| 1231 | D0R2G4  | D0R2G4_LACJF  | Bacteria | alaS F19785_490      | <i>Lactobacillus johnsonii</i> (strain F19785)                                      | 882 |
| 1232 | D0RJA7  | D0RJA7_9RHIZ  | Bacteria | BATG_02591           | <i>Brucella</i> sp. F5/99                                                           | 885 |
| 1233 | D0RJP5  | D0RJP5_9RICK  | Bacteria | alaS HIMB114_0833    | <i>Alpha proteobacterium</i> HIMB114                                                | 892 |
| 1234 | D0RW46  | D0RW46_9STRE  | Bacteria | HMPREF0847_01517     | <i>Streptococcus</i> sp. 2_1_36FAA                                                  | 872 |
| 1235 | D0RZQ5  | D0RZQ5_ACICA  | Bacteria | HMPREF0012_01657     | <i>Acinetobacter calcoaceticus</i> RUH2202                                          | 883 |
| 1236 | D0SC45  | D0SC45_ACIOJ  | Bacteria | HMPREF0016_01418     | <i>Acinetobacter johnsonii</i> SH046                                                | 892 |
| 1237 | D0SMN5  | D0SMN5_ACIIJ  | Bacteria | HMPREF0026_00568     | <i>Acinetobacter junii</i> SH205                                                    | 884 |
| 1238 | D0STI2  | D0STI2_ACILW  | Bacteria | HMPREF0017_00606     | <i>Acinetobacter lwoffii</i> SH145                                                  | 892 |
| 1239 | D0T247  | D0T247_ACIRA  | Bacteria | HMPREF0018_00487     | <i>Acinetobacter radioresistens</i> SH164                                           | 897 |
| 1240 | D0TFI7  | D0TFI7_9BACE  | Bacteria | HMPREF0103_3080      | <i>Bacteroides</i> sp. 2_1_33B                                                      | 873 |
| 1241 | D0TUL0  | D0TUL0_9BACE  | Bacteria | HMPREF0102_03260     | <i>Bacteroides</i> sp. 2_1_22                                                       | 873 |
| 1242 | D0W5E7  | D0W5E7_NEICI  | Bacteria | NEICINOT_04910       | <i>Neisseria cinerea</i> ATCC 14685                                                 | 874 |
| 1243 | D0WA21  | D0WA21_NEILA  | Bacteria | NEILACOT_04387       | <i>Neisseria lactamica</i> ATCC 23970                                               | 885 |
| 1244 | D0WG12  | D0WG12_9ACTN  | Bacteria | HMPREF0762_00762     | <i>Slackia exigua</i> ATCC 700122                                                   | 901 |
| 1245 | D0WN09  | D0WN09_9ACTO  | Bacteria | HMPREF0972_01174     | <i>Actinomyces</i> sp. oral taxon 848 str. F0332                                    | 888 |
| 1246 | D0WUF8  | D0WUF8_VIBAL  | Bacteria | alaS VMC_08080       | <i>Vibrio alginolyticus</i> 40B                                                     | 860 |
| 1247 | D0X7S6  | D0X7S6_VIBHA  | Bacteria | alaS VME_11390       | <i>Vibrio harveyi</i> 1DA3                                                          | 860 |
| 1248 | D0YST7  | D0YST7_9ACTO  | Bacteria | alaS HMPREF0578_2262 | <i>Mobiluncus mulieris</i> 28-1                                                     | 894 |
| 1249 | D0YW36  | D0YW36_LISDA  | Bacteria | VDA_001299           | <i>Photobacterium damsela</i> subsp. <i>damsela</i> CIP 102761                      | 873 |
| 1250 | D0ZDR3  | D0ZDR3_EDWTE  | Bacteria | alaS ETAE_2859       | <i>Edwardsiella tarda</i> (strain EIB202)                                           | 875 |
| 1251 | D0ZUV1  | D0ZUV1_SALT1  | Bacteria | alaS STM14_3413      | <i>Salmonella typhimurium</i> (strain 14028s / SGSC 2262)                           | 876 |
| 1252 | D0ZZE3  | D0ZZE3_CHLPP  | Bacteria | alaS CPK_ORF00303    | <i>Chlamydomonas pneumoniae</i> (strain LPCoLN)                                     | 872 |
| 1253 | D1AEX6  | D1AEX6_THECD  | Bacteria | Tcur_2135            | <i>Thermomonospora curvata</i> (strain ATCC 19995 / DSM 43183 / JCM                 | 889 |
| 1254 | D1AAML1 | D1AAML1_SEBTE | Bacteria | Sterm_2740           | <i>Sebadella termitida</i> (strain ATCC 33386 / NCTC 11300)                         | 870 |
| 1255 | D1AST8  | D1AST8_ANACI  | Bacteria | alaS ACIS_01064      | <i>Anaplasma centrale</i> (strain Israel) ( <i>Anaplasma marginale</i> subsp. ce    | 882 |
| 1256 | D1AX74  | D1AX74_STRM9  | Bacteria | Smon_0418            | <i>Streptobacillus moniliformis</i> (strain ATCC 14647 / DSM 12112 / NC             | 865 |
| 1257 | D1B5H4  | D1B5H4_THEAS  | Bacteria | Taci_1033            | <i>Thermanaerovibrio acidaminovorans</i> (strain ATCC 49978 / DSM 658               | 882 |
| 1258 | D1BGX6  | D1BGX6_SANKS  | Bacteria | Sked_17690           | <i>Sanguibacter keddiei</i> (strain ATCC 51767 / DSM 10542 / NCFB 302               | 895 |
| 1259 | D1BNA4  | D1BNA4_VEIPT  | Bacteria | Vpar_1181            | <i>Veillonella parvula</i> (strain ATCC 10790 / DSM 2008 / JCM 12972 / T            | 871 |
| 1260 | D1BSM0  | D1BSM0_XYLCX  | Bacteria | Xcel_1689            | <i>Xylanimonas cellulositytica</i> (strain DSM 15894 / CECT 5975 / LMG 2            | 895 |
| 1261 | D1C426  | D1C426_SPHTD  | Bacteria | Sthe_1558            | <i>Sphaerobacter thermophilus</i> (strain DSM 20745 / S 6022)                       | 879 |
| 1262 | D1CDK5  | D1CDK5_THET1  | Bacteria | Tter_0089            | <i>Thermobaculum terrenum</i> (strain ATCC BAA-798 / YNP1)                          | 879 |
| 1263 | D1CYF7  | D1CYF7_9RHIZ  | Bacteria | BAKG_00587           | <i>Brucella</i> sp. 83/13                                                           | 885 |
| 1264 | D1D3Z8  | D1D3Z8_NEIGO  | Bacteria | NGBG_00469           | <i>Neisseria gonorrhoeae</i> 35/02                                                  | 881 |
| 1265 | D1D8N4  | D1D8N4_NEIGO  | Bacteria | NGEG_01917           | <i>Neisseria gonorrhoeae</i> FA19                                                   | 881 |

|      |        |               |          |                      |                                                                      |     |
|------|--------|---------------|----------|----------------------|----------------------------------------------------------------------|-----|
| 1266 | D1DJY5 | D1DJY5 NEIGO  | Bacteria | NGFG_02062           | Neisseria gonorrhoeae MS11                                           | 874 |
| 1267 | D1DRM8 | D1DRM8 NEIGO  | Bacteria | NGGG_01930           | Neisseria gonorrhoeae PID18                                          | 874 |
| 1268 | D1DTJ2 | D1DTJ2 NEIGO  | Bacteria | NGHG_01928           | Neisseria gonorrhoeae PID1                                           | 874 |
| 1269 | D1DZ84 | D1DZ84 NEIGO  | Bacteria | NGJG_01996           | Neisseria gonorrhoeae PID332                                         | 874 |
| 1270 | D1E727 | D1E727 NEIGO  | Bacteria | NGKG_00487           | Neisseria gonorrhoeae SK-92-679                                      | 874 |
| 1271 | D1EC18 | D1EC18 NEIGO  | Bacteria | NGLG_01945           | Neisseria gonorrhoeae SK-93-1035                                     | 874 |
| 1272 | D1EML8 | D1EML8 9RHIZ  | Bacteria | BALG_01443           | Brucella pinnipedialis M292/94/1                                     | 885 |
| 1273 | D1EW08 | D1EW08 BRUME  | Bacteria | BAMG_00877           | Brucella melitensis bv. 1 str. Rev.1                                 | 885 |
| 1274 | D1F986 | D1F986 BRUME  | Bacteria | BAOG_00887           | Brucella melitensis bv. 3 str. Ether                                 | 885 |
| 1275 | D1FG02 | D1FG02 9RHIZ  | Bacteria | BAPG_01450           | Brucella ceti M490/95/1                                              | 885 |
| 1276 | D1GMN2 | D1GMN2 STAA0  | Bacteria | alaS SATW20_16130    | Staphylococcus aureus (strain TW20 / 0582)                           | 877 |
| 1277 | D1J7R8 | D1J7R8 MYCHP  | Bacteria | alaS MHO_1310        | Mycoplasma hominis (strain ATCC 23114 / IFO 14850 / NCTC 1011)       | 887 |
| 1278 | D1JRZ3 | D1JRZ3 9BACE  | Bacteria | HMPREF0101_02664     | Bacteroides sp. 2_1_16                                               | 872 |
| 1279 | D1K8X7 | D1K8X7 9BACE  | Bacteria | HMPREF0105_4069      | Bacteroides sp. 3_1_33FAA                                            | 872 |
| 1280 | D1NSA7 | D1NSA7 9BIFI  | Bacteria | BIFGAL_02663         | Bifidobacterium gallicum DSM 20093                                   | 897 |
| 1281 | D1P5U5 | D1P5U5 9ENTR  | Bacteria | PROVRUST_07608       | Providencia rustigianii DSM 4541                                     | 875 |
| 1282 | D1PB45 | D1PB45 9BACT  | Bacteria | PREVCOP_04421        | Prevotella copri DSM 18205                                           | 887 |
| 1283 | D1PKP3 | D1PKP3 9FIRM  | Bacteria | SUBVAR_04920         | Subdoligranulum variabile DSM 15176                                  | 886 |
| 1284 | D1PX65 | D1PX65 9BACT  | Bacteria | alaS HMPREF0645_1550 | Prevotella bergensis DSM 17361                                       | 886 |
| 1285 | D1Q6P0 | D1Q6P0 STAAU  | Bacteria | SAPG_00241           | Staphylococcus aureus A9765                                          | 876 |
| 1286 | D1QJ88 | D1QJ88 STAAU  | Bacteria | SAQG_01762           | Staphylococcus aureus A10102                                         | 876 |
| 1287 | D1QPE6 | D1QPE6 9BACT  | Bacteria | HMPREF0971_00836     | Prevotella oris F0302                                                | 887 |
| 1288 | D1QXV9 | D1QXV9 STAAU  | Bacteria | SGAG_00475           | Staphylococcus aureus A8117                                          | 876 |
| 1289 | D1R5V9 | D1R5V9 9CHLA  | Bacteria | pah_c014o045         | Parachlamydia acanthamoebae str. Hall's coccus                       | 876 |
| 1290 | D1RG57 | D1RG57 LEGLO  | Bacteria | alaS LLB_0586        | Legionella longbeachae D-4968                                        | 860 |
| 1291 | D1SS50 | D1SS50 9BURK  | Bacteria | AcavDRAFT_0953       | Acidovorax avenae subsp. avenae ATCC 19860                           | 876 |
| 1292 | D1TRE2 | D1TRE2 YERPE  | Bacteria | alaS YPD27_2917      | Yersinia pestis KIM D27                                              | 875 |
| 1293 | D1VUM1 | D1VUM1 9FIRM  | Bacteria | alaS HMPREF0628_0522 | Peptoniphilus lacrimalis 315-B                                       | 874 |
| 1294 | D1W041 | D1W041 9BACT  | Bacteria | alaS HMPREF9019_0030 | Prevotella timonensis CRIS 5C-B1                                     | 875 |
| 1295 | D1W600 | D1W600 9BACT  | Bacteria | alaS HMPREF0650_1587 | Prevotella buccalis ATCC 35310                                       | 872 |
| 1296 | D1WCF2 | D1WCF2 9LACO  | Bacteria | alaS HMPREF0886_2997 | Lactobacillus jensenii 208-1                                         | 878 |
| 1297 | D1WDE4 | D1WDE4 9LACO  | Bacteria | alaS HMPREF0886_0769 | Lactobacillus jensenii 208-1                                         | 878 |
| 1298 | D1WN13 | D1WN13 STAPE  | Bacteria | alaS HMPREF0797_1497 | Staphylococcus epidermidis SK135                                     | 876 |
| 1299 | D1X672 | D1X672 9ACTO  | Bacteria | SACT1DRAFT_5562      | Streptomyces sp. ACT-1                                               | 889 |
| 1300 | D1XT04 | D1XT04 9ACTO  | Bacteria | SACTEDRAFT_5814      | Streptomyces sp. ACTE                                                | 889 |
| 1301 | D1XXK9 | D1XXK9 9BACT  | Bacteria | alaS HMPREF0648_1138 | Prevotella bivia JCVIHP010                                           | 885 |
| 1302 | D1Y3T5 | D1Y3T5 9BACT  | Bacteria | alaS HMPREF7215_0626 | Pyramidobacter piscolens W5455                                       | 882 |
| 1303 | D1YC72 | D1YC72_PROAC  | Bacteria | alaS HMPREF9206_1803 | Propionibacterium acnes J139                                         | 892 |
| 1304 | D1YJL6 | D1YJL6 9LACO  | Bacteria | alaS HMPREF9209_2105 | Lactobacillus gasserii 224-1                                         | 882 |
| 1305 | D1YS03 | D1YS03 9FIRM  | Bacteria | alaS HMPREF1035_1809 | Veillonella parvula ATCC 17745                                       | 871 |
| 1306 | D2AID9 | D2AID9 SHIF2  | Bacteria | alaS SFxv_2985       | Shigella flexneri serotype X (strain 2002017)                        | 876 |
| 1307 | D2ANQ1 | D2ANQ1 FRATE  | Bacteria | NE061598_06315       | Francisella tularensis subsp. tularensis (strain NE061598)           | 865 |
| 1308 | D2AVH4 | D2AVH4 STRRD  | Bacteria | Sros_6094            | Streptosporangium roseum (strain ATCC 12428 / DSM 43021 / JCM)       | 890 |
| 1309 | D2BL14 | D2BL14 LACLK  | Bacteria | alaS LLKF_1895       | Lactococcus lactis subsp. lactis (strain KF147)                      | 872 |
| 1310 | D2BUH2 | D2BUH2 DICD5  | Bacteria | Dd586_3184           | Dickeya dadantii (strain Ech586)                                     | 875 |
| 1311 | D2C435 | D2C435 THENR  | Bacteria | Tnap_1407            | Thermotoga naphthophila (strain ATCC BAA-489 / DSM 13996 / JCI)      | 863 |
| 1312 | D2EK39 | D2EK39 PEDAC  | Bacteria | HMPREF9024_01151     | Pediococcus acidilactici 7_4                                         | 881 |
| 1313 | D2EQD3 | D2EQD3 9STRE  | Bacteria | HMPREF0850_00192     | Streptococcus sp. M143                                               | 872 |
| 1314 | D2EV56 | D2EV56 9BACE  | Bacteria | HMPREF0969_01028     | Bacteroides sp. D20                                                  | 872 |
| 1315 | D2F7P5 | D2F7P5 STAAU  | Bacteria | SARG_02266           | Staphylococcus aureus subsp. aureus C101                             | 876 |
| 1316 | D2FDT7 | D2FDT7 STAAU  | Bacteria | SASG_00699           | Staphylococcus aureus subsp. aureus C427                             | 876 |
| 1317 | D2FMF6 | D2FMF6 STAAU  | Bacteria | SATG_00380           | Staphylococcus aureus subsp. aureus D139                             | 876 |
| 1318 | D2FVX3 | D2FVX3 STAAU  | Bacteria | SAWG_01633           | Staphylococcus aureus subsp. aureus M899                             | 876 |
| 1319 | D2G2I6 | D2G2I6 STAAU  | Bacteria | SAXG_01256           | Staphylococcus aureus subsp. aureus WBG10049                         | 877 |
| 1320 | D2G9T5 | D2G9T5 STAAU  | Bacteria | SAYG_00257           | Staphylococcus aureus subsp. aureus WW2703/97                        | 877 |
| 1321 | D2GGX1 | D2GGX1 STAAU  | Bacteria | SDAG_01649           | Staphylococcus aureus subsp. aureus Btn1260                          | 876 |
| 1322 | D2GS19 | D2GS19 STAAU  | Bacteria | SFAG_01650           | Staphylococcus aureus subsp. aureus C160                             | 876 |
| 1323 | D2LAK8 | D2LAK8 9DELTA | Bacteria | DFW101DRAFT_3721     | Desulfovibrio sp. FW1012B                                            | 880 |
| 1324 | D2MH69 | D2MH69 9BACT  | Bacteria | alaS POR_0018        | Candidatus Poribacteria sp. WGA-A3                                   | 734 |
| 1325 | D2MPX1 | D2MPX1 9FIRM  | Bacteria | alaS HMPREF9013_0361 | Bulleidia extracta W1219                                             | 875 |
| 1326 | D2N7V8 | D2N7V8 STAA5  | Bacteria | alaS SAPIG1682       | Staphylococcus aureus (strain MRSA ST398 / isolate S0385)            | 877 |
| 1327 | D2NLK6 | D2NLK6 ECOS5  | Bacteria | ECSF_2490            | Escherichia coli O150:H5 (strain SE15)                               | 876 |
| 1328 | D2NT32 | D2NT32 ROTMD  | Bacteria | RMDY18_09760         | Rothia mucilaginosa (strain DY-18) (Stomatococcus mucilaginosus)     | 895 |
| 1329 | D2P2D3 | D2P2D3 LISM1  | Bacteria | alaS LM5578_1649     | Listeria monocytogenes serotype 1/2a (strain 08-5578)                | 832 |
| 1330 | D2P569 | D2P569 LISM2  | Bacteria | alaS LM5923_1601     | Listeria monocytogenes serotype 1/2a (strain 08-5923)                | 832 |
| 1331 | D2PVC5 | D2PVC5 KRIFD  | Bacteria | kfla_4372            | Kribbella flavida (strain DSM 17836 / JCM 10339 / NBRC 14399)        | 889 |
| 1332 | D2QA28 | D2QA28 BIFDB  | Bacteria | alaS BDP_1021        | Bifidobacterium dentium (strain ATCC 27534 / DSM 20436 / JCM 1)      | 892 |
| 1333 | D2QFM4 | D2QFM4 SPILD  | Bacteria | Slin_2378            | Spirosoma linguale (strain ATCC 33905 / DSM 74 / LMG 10896)          | 890 |
| 1334 | D2R9Z0 | D2R9Z0 GARV4  | Bacteria | alaS HMPREF0424_0375 | Gardnerella vaginalis (strain 409-05)                                | 894 |
| 1335 | D2RJM7 | D2RJM7 ACIFV  | Bacteria | Acfer_0894           | Acidaminococcus fermentans (strain ATCC 25085 / DSM 20731 / VF)      | 875 |
| 1336 | D2S9G4 | D2S9G4 GEOOG  | Bacteria | Gobs_3158            | Geodermatophilus obscurus (strain ATCC 25078 / DSM 43160 / JCM)      | 897 |
| 1337 | D2T5I0 | D2T5I0 ERWP6  | Bacteria | alaS EPYR_03031      | Erwinia pyrifoliae (strain DSM 12163 / CIP 106111 / Ep16/96)         | 876 |
| 1338 | D2TLG1 | D2TLG1 CITRI  | Bacteria | alaS ROD_31171       | Citrobacter rodentium (strain ICC168) (Citrobacter freundii biotype) | 875 |
| 1339 | D2U037 | D2U037 9ENTR  | Bacteria | alaS ARN_18400       | Arsenophonus nasoniae (son-killer infecting Nasonia vitripennis)     | 899 |
| 1340 | D2U8D7 | D2U8D7 XANAP  | Bacteria | alaS XALC_1173       | Xanthomonas albilineans (strain GPE PC73 / CFBP 7063)                | 883 |
| 1341 | D2UMP2 | D2UMP2 STAAU  | Bacteria | SAUG_01021           | Staphylococcus aureus subsp. aureus H19                              | 876 |
| 1342 | D2USN5 | D2USN5 STAAU  | Bacteria | SHAG_01602           | Staphylococcus aureus subsp. aureus A017934/97                       | 876 |



|      |        |              |          |                        |                                                                    |     |
|------|--------|--------------|----------|------------------------|--------------------------------------------------------------------|-----|
| 1343 | D2Y951 | D2Y951 VIBMI | Bacteria | alaS VMB_00610         | Vibrio mimicus VM603                                               | 858 |
| 1344 | D2YUX8 | D2YUX8 VIBMI | Bacteria | alaS VMD_35620         | Vibrio mimicus VM573                                               | 860 |
| 1345 | D2Z416 | D2Z416_9BACT | Bacteria | Dpep_2255              | Dethiosulfovibrio peptidovorans DSM 11002                          | 878 |
| 1346 | D2ZJG9 | D2ZJG9_9ENTR | Bacteria | ENTCAN_08672           | Enterobacter cancerogenus ATCC 35316                               | 875 |
| 1347 | D2ZVD6 | D2ZVD6_NEIMU | Bacteria | NEIMUCOT_04579         | Neisseria mucosa ATCC 25996                                        | 873 |
| 1348 | D3ATJ8 | D3ATJ8_9CLOT | Bacteria | CLOSTHATH_06957        | Clostridium hathewayi DSM 13479                                    | 813 |
| 1349 | D3CXI9 | D3CXI9_9ACTO | Bacteria | FrEUN1FDRAFT_2259      | Frankia sp. EUN1f                                                  | 880 |
| 1350 | D3DKE4 | D3DKE4_HYDIT | Bacteria | alaS HTH_1852_Hydh_183 | Hydrogenobacter thermophilus (strain DSM 6534 / IAM 12695 / TK     | 871 |
| 1351 | D3ELL9 | D3ELL9_GEOS4 | Bacteria | GYMC10_1594            | Geobacillus sp. (strain Y412MC10)                                  | 875 |
| 1352 | D3EQ32 | D3EQ32_UCYNA | Bacteria | UCYN_08980             | Cyanobacterium UCYN-A                                              | 880 |
| 1353 | D3EX14 | D3EX14_STAA4 | Bacteria | alaS SA2981_1576       | Staphylococcus aureus (strain 04-02981)                            | 876 |
| 1354 | D3FCU1 | D3FCU1_CONWI | Bacteria | Cwoe_3034              | Conexibacter woesei (strain DSM 14684 / JCM 11494 / NBRC 1009      | 888 |
| 1355 | D3FVZ4 | D3FVZ4_BACPE | Bacteria | alaS BpOF4_11865       | Bacillus pseudofirmus (strain OF4)                                 | 879 |
| 1356 | D3GRM9 | D3GRM9_ECO44 | Bacteria | alaS EC042_2890        | Escherichia coli O44:H18 (strain 042 / EAEC)                       | 876 |
| 1357 | D3H804 | D3H804_STRM6 | Bacteria | alaRS smi_0749         | Streptococcus mitis (strain B6)                                    | 872 |
| 1358 | D3HCB1 | D3HCB1_STRG3 | Bacteria | alaS GALLO_0674        | Streptococcus gallolyticus (strain UCN34)                          | 872 |
| 1359 | D3HRE7 | D3HRE7_LEGLN | Bacteria | alaS LLO_1119          | Legionella longbeachae serogroup 1 (strain NSW150)                 | 860 |
| 1360 | D3HV47 | D3HV47_9BACT | Bacteria | HMPREF0649_00129       | Prevotella buccae D17                                              | 881 |
| 1361 | D3I760 | D3I760_9BACT | Bacteria | HMPREF0660_01725       | Prevotella melaninogenica D18                                      | 887 |
| 1362 | D3IEJ3 | D3IEJ3_9BACT | Bacteria | HMPREF0669_01847       | Prevotella sp. oral taxon 299 str. F0039                           | 872 |
| 1363 | D3IFI4 | D3IFI4_9BACT | Bacteria | HMPREF0670_00103       | Prevotella sp. oral taxon 317 str. F0108                           | 872 |
| 1364 | D3KPB5 | D3KPB5_LISMO | Bacteria | LMFG_02141             | Listeria monocytogenes FSL J2-071                                  | 879 |
| 1365 | D3L233 | D3L233_9BACT | Bacteria | HMPREF1705_00974       | Anaerobaculum hydrogeliformans ATCC BAA-1850                       | 880 |
| 1366 | D3L9Y0 | D3L9Y0_OENOE | Bacteria | AWRIB429_1160          | Oenococcus oeni AWRIB429                                           | 885 |
| 1367 | D3LGF6 | D3LGF6_ENTFC | Bacteria | EDAG_01275             | Enterococcus faecium D344SRF                                       | 880 |
| 1368 | D3LQ63 | D3LQ63_MICLU | Bacteria | alaS HMPREF0569_2433   | Micrococcus luteus SK58                                            | 903 |
| 1369 | D3LUB6 | D3LUB6_9FIRM | Bacteria | alaS HMPREF0889_1310   | Megasphaera genomsp. type 1 str. 28L                               | 869 |
| 1370 | D3M4U7 | D3M4U7_9ACTO | Bacteria | FsymDgDRAFT_2689       | Frankia symbiont of Datisca glomerata                              | 894 |
| 1371 | D3MG35 | D3MG35_PROAC | Bacteria | alaS HMPREF9207_0689   | Propionibacterium acnes J165                                       | 892 |
| 1372 | D3ML07 | D3ML07_PROAC | Bacteria | alaS HMPREF1034_0342   | Propionibacterium acnes SK187                                      | 913 |
| 1373 | D3MT50 | D3MT50_9FIRM | Bacteria | alaS HMPREF0631_1070   | Peptostreptococcus anaerobius 653-L                                | 878 |
| 1374 | D3P008 | D3P008_AZOS1 | Bacteria | alaS AZL_a04560        | Azospirillum sp. (strain B510)                                     | 889 |
| 1375 | D3PEA0 | D3PEA0_DEFDS | Bacteria | alaS DEFDS_1463        | Deferribacter desulfuricans (strain DSM 14783 / JCM 11476 / NBRC   | 871 |
| 1376 | D3PPT2 | D3PPT2_MEIRD | Bacteria | Mrub_2952              | Meiothermus ruber (strain ATCC 35948 / DSM 1279 / VKM B-1258       | 883 |
| 1377 | D3PYV0 | D3PYV0_STANL | Bacteria | Snas_3878              | Stackebrandtia nassauensis (strain DSM 44728 / NRRL B-16338 / N    | 885 |
| 1378 | D3QCD9 | D3QCD9_STALH | Bacteria | SLGD_01301             | Staphylococcus lugdunensis (strain HKU09-01)                       | 876 |
| 1379 | D3QPP4 | D3QPP4_ECOCB | Bacteria | alaS G2583_3345        | Escherichia coli O55:H7 (strain CB9615 / EPEC)                     | 876 |
| 1380 | D3R347 | D3R347_CLOB3 | Bacteria | alaS HMPREF0868_1344   | Clostridiales genomsp. BVAB3 (strain UPII9-5)                      | 886 |
| 1381 | D3R5D2 | D3R5D2_BIFAB | Bacteria | BIF_00673              | Bifidobacterium animalis subsp. lactis (strain BB-12)              | 899 |
| 1382 | D3RJG7 | D3RJG7_KLEVT | Bacteria | Kvar_1043              | Klebsiella variicola (strain At-22)                                | 875 |
| 1383 | D3RRY5 | D3RRY5_ALLVD | Bacteria | Alvin_1100             | Allochromatium vinosum (strain ATCC 17899 / DSM 180 / NBRC 10      | 867 |
| 1384 | D3SAQ6 | D3SAQ6_THISK | Bacteria | TK90_1614              | Thioalkalivibrio sp. (strain K90mix)                               | 869 |
| 1385 | D3SN45 | D3SN45_THEAH | Bacteria | Thal_1546              | Thermocrinis albus (strain DSM 14484 / JCM 11386 / HI 11/12)       | 864 |
| 1386 | D3T8M6 | D3T8M6_THEIA | Bacteria | Thit_1041              | Thermoanaerobacter italicus (strain DSM 9252 / Ab9)                | 877 |
| 1387 | D3UN87 | D3UN87_LISSS | Bacteria | alaS lse_1419          | Listeria seeligeri serovar 1/2b (strain ATCC 35967 / DSM 20751 / C | 879 |
| 1388 | D3UVL8 | D3UVL8_CHLTS | Bacteria | alaS SW2_7611          | Chlamydia trachomatis serovar E (strain Sweden2)                   | 875 |
| 1389 | D3V425 | D3V425_XENBS | Bacteria | alaS XBj1_3286         | Xenorhabdus bovienii (strain SS-2004)                              | 887 |
| 1390 | D3V9U5 | D3V9U5_XENNA | Bacteria | alaS XNC1_1262         | Xenorhabdus nematophila (strain ATCC 19061 / DSM 3370 / LMG 1      | 875 |
| 1391 | D4BHE3 | D4BHE3_9ENTR | Bacteria | CIT292_09950           | Citrobacter youngae ATCC 29220                                     | 875 |
| 1392 | D4BP77 | D4BP77_BIFBR | Bacteria | BIFBRE_03885           | Bifidobacterium breve DSM 20213                                    | 892 |
| 1393 | D4C4M5 | D4C4M5_PRORE | Bacteria | PROVRETT_09573         | Providencia rettgeri DSM 1131                                      | 875 |
| 1394 | D4CET7 | D4CET7_9CLOT | Bacteria | CLOM621_07956          | Clostridium sp. M62/1                                              | 868 |
| 1395 | D4CQ26 | D4CQ26_9FIRM | Bacteria | GCWU000341_02468       | Oribacterium sp. oral taxon 078 str. F0262                         | 882 |
| 1396 | D4CU78 | D4CU78_9FUSO | Bacteria | FUSPEROL_00952         | Fusobacterium periodonticum ATCC 33693                             | 867 |
| 1397 | D4DQU4 | D4DQU4_NEIEG | Bacteria | NEIELOOT_01435         | Neisseria elongata subsp. glycolytica ATCC 29315                   | 873 |
| 1398 | D4DWX4 | D4DWX4_SEROD | Bacteria | alaS HMPREF0758_0424   | Serratia odorifera DSM 4582                                        | 875 |
| 1399 | D4EDT4 | D4EDT4_AGGAC | Bacteria | D7S_1042               | Aggregatibacter actinomycetemcomitans D7S-1                        | 874 |
| 1400 | D4ELV7 | D4ELV7_ENTFA | Bacteria | HMPREF9376_01630       | Enterococcus faecalis S613                                         | 880 |
| 1401 | D4ETS5 | D4ETS5_ENTFA | Bacteria | HMPREF9377_00932       | Enterococcus faecalis R712                                         | 880 |
| 1402 | D4F1G4 | D4F1G4_EDWTA | Bacteria | EDWATA_00554           | Edwardsiella tarda ATCC 23685                                      | 875 |
| 1403 | D4FG35 | D4FG35_9LACO | Bacteria | alaS HMPREF0891_1183   | Lactobacillus crispatus 214-1                                      | 879 |
| 1404 | D4FIJ6 | D4FIJ6_STAEP | Bacteria | alaS HMPREF0794_0384   | Staphylococcus epidermidis M23864:W2(grey)                         | 876 |
| 1405 | D4FTQ4 | D4FTQ4_STROR | Bacteria | alaS HMPREF8579_1535 S | Streptococcus oralis ATCC 35037                                    | 872 |
| 1406 | D4FZE0 | D4FZE0_BACNA | Bacteria | alaS BSNT_03977        | Bacillus subtilis subsp. natto BEST195                             | 878 |
| 1407 | D4G9E5 | D4G9E5_TREPC | Bacteria | TPChic_1017            | Treponema pallidum subsp. pallidum (strain Chicago)                | 649 |
| 1408 | D4GLE6 | D4GLE6_PANAM | Bacteria | alaS PANA_3032         | Pantoea ananatis (strain LMG 20103)                                | 875 |
| 1409 | D4H5Z1 | D4H5Z1_DENA2 | Bacteria | Dacet_0857             | Denitrovibrio acetiphilus (strain DSM 12809 / N2460)               | 877 |
| 1410 | D4HDY5 | D4HDY5_PROAS | Bacteria | alaS HMPREF0675_4239   | Propionibacterium acnes (strain SK137)                             | 892 |
| 1411 | D4HX66 | D4HX66_ERWAC | Bacteria | alaS EAMY_0807         | Erwinia amylovora (strain CFBP1430)                                | 876 |
| 1412 | D4I9E3 | D4I9E3_ERWAE | Bacteria | alaS EAM_2638          | Erwinia amylovora (strain ATCC 49946 / CCPPB 0273 / Ea273 / 27-    | 876 |
| 1413 | D4IJD9 | D4IJD9_9BACT | Bacteria | AL1_03870              | Alistipes shahii WAL 8301                                          | 873 |
| 1414 | D4IJM2 | D4IJM2_BUTFI | Bacteria | CIY_15920              | Butyrivibrio fibrisolvens 16/4                                     | 795 |
| 1415 | D4J843 | D4J843_9FIRM | Bacteria | CC1_17660              | Coprococcus catus GD/7                                             | 880 |
| 1416 | D4JER3 | D4JER3_9FIRM | Bacteria | EC1_12120              | Eubacterium cylindroides T2-87                                     | 875 |
| 1417 | D4JNI3 | D4JNI3_9FIRM | Bacteria | ERE_28380              | Eubacterium rectale M104/1                                         | 886 |
| 1418 | D4JSS8 | D4JSS8_9FIRM | Bacteria | EUS_09260              | Eubacterium siraeum 70/3                                           | 878 |
| 1419 | D4JZP6 | D4JZP6_9FIRM | Bacteria | FP2_21120              | Faecalibacterium prausnitzii L2-6                                  | 886 |

|      |        |              |          |                      |                                                                    |     |
|------|--------|--------------|----------|----------------------|--------------------------------------------------------------------|-----|
| 1420 | D4K887 | D4K887_9FIRM | Bacteria | FPR_06680            | Faecalibacterium prausnitzii SL3/3                                 | 886 |
| 1421 | D4KEX4 | D4KEX4_9FIRM | Bacteria | MHY_22930            | Megamonas hypermegale ART12/1                                      | 637 |
| 1422 | D4L6K8 | D4L6K8_9FIRM | Bacteria | RBR_09230            | Ruminococcus bromii L2-63                                          | 877 |
| 1423 | D4LCC6 | D4LCC6_9FIRM | Bacteria | RUM_11200            | Ruminococcus sp. 18P13                                             | 883 |
| 1424 | D4LGV1 | D4LGV1_9FIRM | Bacteria | CK1_08150            | Ruminococcus sp. SR1/5                                             | 880 |
| 1425 | D4LSU1 | D4LSU1_9FIRM | Bacteria | CK5_25460            | Ruminococcus obeum A2-162                                          | 879 |
| 1426 | D4M5L3 | D4M5L3_9FIRM | Bacteria | RTO_19880            | Ruminococcus torques L2-14                                         | 879 |
| 1427 | D4M823 | D4M823_9BACT | Bacteria | SY1_06490            | Synergistetes bacterium SGP1                                       | 879 |
| 1428 | D4MMH8 | D4MMH8_9FIRM | Bacteria | ES1_20960            | Eubacterium siraeum V10Sc8a                                        | 878 |
| 1429 | D4PK12 | D4PK12_LISMO | Bacteria | LMBG_00951           | Listeria monocytogenes FSL J1-194                                  | 879 |
| 1430 | D4PU09 | D4PU09_LISMO | Bacteria | LMPG_01086           | Listeria monocytogenes J2818                                       | 879 |
| 1431 | D4Q1N1 | D4Q1N1_LISMO | Bacteria | LMSG_00830           | Listeria monocytogenes HPB2262                                     | 879 |
| 1432 | D4QHN4 | D4QHN4_ENTFC | Bacteria | EfmE980_0304         | Enterococcus faecium E980                                          | 880 |
| 1433 | D4QWT3 | D4QWT3_ENTFC | Bacteria | EfmE1071_2384        | Enterococcus faecium E1071                                         | 880 |
| 1434 | D4QXU8 | D4QXU8_ENTFC | Bacteria | EfmE1162_0035        | Enterococcus faecium E1162                                         | 880 |
| 1435 | D4RCQ7 | D4RCQ7_ENTFC | Bacteria | EfmE1636_2626        | Enterococcus faecium E1636                                         | 880 |
| 1436 | D4RG06 | D4RG06_ENTFC | Bacteria | EfmE1679_0759        | Enterococcus faecium E1679                                         | 880 |
| 1437 | D4RRV7 | D4RRV7_ENTFC | Bacteria | EfmU0317_1628        | Enterococcus faecium U0317                                         | 880 |
| 1438 | D4S065 | D4S065_9FIRM | Bacteria | BUTYVIB_01481        | Butyrivibrio crossotus DSM 2876                                    | 884 |
| 1439 | D4S8K2 | D4S8K2_9FIRM | Bacteria | alaS_HMPREF7545_1867 | Selenomonas noxia ATCC 43541                                       | 872 |
| 1440 | D4SK82 | D4SK82_ENTFC | Bacteria | EfmE1039_0847        | Enterococcus faecium E1039                                         | 880 |
| 1441 | D4SX88 | D4SX88_9XANT | Bacteria | alaS_XAUB_27150      | Xanthomonas fuscans subsp. aurantifolii str. ICPB 11122            | 882 |
| 1442 | D4T5P9 | D4T5P9_9XANT | Bacteria | alaS_XAUC_16480      | Xanthomonas fuscans subsp. aurantifolii str. ICPB 10535            | 882 |
| 1443 | D4TJI2 | D4TJI2_9NOST | Bacteria | CRC_02571            | Cylindrospermopsis raciborskii CS-505                              | 878 |
| 1444 | D4TPY3 | D4TPY3_9NOST | Bacteria | CRD_01274            | Raphidiopsis brookii D9                                            | 878 |
| 1445 | D4U185 | D4U185_9ACTO | Bacteria | HMPREF0970_01984     | Actinomyces odontolyticus F0309                                    | 902 |
| 1446 | D4U4H1 | D4U4H1_STAAU | Bacteria | SKAG_00714           | Staphylococcus aureus A9754                                        | 877 |
| 1447 | D4UG09 | D4UG09_STAAU | Bacteria | SMAG_01912           | Staphylococcus aureus A8819                                        | 876 |
| 1448 | D4UXA4 | D4UXA4_ENTFA | Bacteria | alaS_CUI_1809        | Enterococcus faecalis PC1.1                                        | 880 |
| 1449 | D4VCA8 | D4VCA8_BACVU | Bacteria | alaS_CUU_1450        | Bacteroides vulgatus PC510                                         | 872 |
| 1450 | D4VF49 | D4VF49_9BACE | Bacteria | alaS_CW3_3120        | Bacteroides xylanisolvens SD CC 1b                                 | 872 |
| 1451 | D4VUY6 | D4VUY6_ENTFC | Bacteria | alaS_CUO_1706        | Enterococcus faecium PC4.1                                         | 880 |
| 1452 | D4W1U2 | D4W1U2_9FIRM | Bacteria | alaS_CUW_0487        | Turicibacter sanguinis PC909                                       | 873 |
| 1453 | D4WJB8 | D4WJB8_BACOV | Bacteria | alaS_CUY_1096        | Bacteroides ovatus SD CMC 3f                                       | 872 |
| 1454 | D4WX58 | D4WX58_BACOV | Bacteria | alaS_CW1_2681        | Bacteroides ovatus SD CC 2a                                        | 872 |
| 1455 | D4XAL0 | D4XAL0_9BUCV | Bacteria | alaS_HMPREF0004_2507 | Achromobacter piechaudii ATCC 43553                                | 874 |
| 1456 | D4XPC6 | D4XPC6_ACIHA | Bacteria | alaS_HMP0015_1568    | Acinetobacter haemolyticus ATCC 19194                              | 884 |
| 1457 | D4Y3H7 | D4Y3H7_BACTR | Bacteria | GeothDRAFT_0440      | Geobacillus thermoglucosidasius C56-YS93                           | 877 |
| 1458 | D4YE20 | D4YE20_9LACT | Bacteria | alaS_HMPREF0061_0109 | Aerococcus viridans ATCC 11563                                     | 880 |
| 1459 | D4YPE3 | D4YPE3_9MICO | Bacteria | alaS_HMPREF0183_1803 | Brevibacterium mcbrellneri ATCC 49030                              | 884 |
| 1460 | D4YTW5 | D4YTW5_9LACO | Bacteria | alaS_HMPREF0493_0976 | Lactobacillus amylolyticus DSM 11664                               | 879 |
| 1461 | D4Z310 | D4Z310_SPHJU | Bacteria | alaS_SJA_C1-21580    | Sphingobium japonicum (strain NBRC 101211 / UT26S)                 | 884 |
| 1462 | D4ZAU0 | D4ZAU0_SHEVD | Bacteria | alaS_SVI_3164        | Shewanella violacea (strain JCM 10179 / CIP 106290 / LMG 19151)    | 874 |
| 1463 | D5A1C6 | D5A1C6_SPIPL | Bacteria | alaS_NIES39_L06520   | Arthrospira platensis NIES-39                                      | 878 |
| 1464 | D5AI86 | D5AI86_STRGZ | Bacteria | SSGZ1_1094           | Streptococcus suis (strain GZ1)                                    | 512 |
| 1465 | D5AU58 | D5AU58_RHOGB | Bacteria | alaS_RCAP_rc01752    | Rhodobacter capsulatus (strain ATCC BAA-309 / NBRC 16581 / SB1)    | 884 |
| 1466 | D5AYE4 | D5AYE4_RICPP | Bacteria | alaS_rpr22_CDS836    | Rickettsia prowazekii (strain Rp22)                                | 877 |
| 1467 | D5B2Q1 | D5B2Q1_YERPZ | Bacteria | alaS_YPZ3_2908       | Yersinia pestis (strain Z176003)                                   | 847 |
| 1468 | D5BGH8 | D5BGH8_ZUNPS | Bacteria | ZPR_0787             | Zunongwangia profunda (strain DSM 18752 / CCTCC AB 206139 / S)     | 869 |
| 1469 | D5BNR5 | D5BNR5_PUNMI | Bacteria | SAR116_0089          | Puniceispirillum marinum (strain IMCC1322)                         | 879 |
| 1470 | D5BZJ6 | D5BZJ6_NITHN | Bacteria | Nhal_1120            | Nitrosococcus halophilus (strain Nc4)                              | 873 |
| 1471 | D5C8H5 | D5C8H5_ENTCC | Bacteria | ECL_04031            | Enterobacter cloacae subsp. cloacae (strain ATCC 13047 / DSM 300)  | 875 |
| 1472 | D5CU19 | D5CU19_SIDLE | Bacteria | Slit_2103            | Sideroxydans lithotrophicus (strain ES-1)                          | 873 |
| 1473 | D5CYI8 | D5CYI8_ECOKI | Bacteria | pbpG_ECOK1_3068      | Escherichia coli O18:K1:H7 (strain IHE3034 / ExPEC)                | 876 |
| 1474 | D5DLE5 | D5DLE5_BACMD | Bacteria | alaS_BMD_4597        | Bacillus megaterium (strain DSM 319)                               | 877 |
| 1475 | D5DT03 | D5DT03_BACMQ | Bacteria | alaS_BMQ_4611        | Bacillus megaterium (strain ATCC 12872 / QMB1551)                  | 877 |
| 1476 | D5EF21 | D5EF21_AMICL | Bacteria | Amico_1029           | Aminobacterium colombiense (strain DSM 12261 / ALA-1)              | 881 |
| 1477 | D5ELN7 | D5ELN7_CORAD | Bacteria | Caka_0185            | Coralliomargarita akajimensis (strain DSM 45221 / IAM 15411 / JCN) | 941 |
| 1478 | D5EUV5 | D5EUV5_PRER2 | Bacteria | alaS_PRU_0009        | Prevotella ruminicola (strain ATCC 19189 / JCM 8958 / 23)          | 887 |
| 1479 | D5H1H6 | D5H1H6_LACCS | Bacteria | alaS_LCRIS_00414     | Lactobacillus crispatus (strain ST1)                               | 879 |
| 1480 | D5H9F8 | D5H9F8_SALRM | Bacteria | alaS_SRM_01742       | Salinibacter ruber (strain M8)                                     | 966 |
| 1481 | D5HG79 | D5HG79_9FIRM | Bacteria | CCU_26190            | Coproccoccus sp. ART55/1                                           | 887 |
| 1482 | D5MF60 | D5MF60_9BACT | Bacteria | alaS_DAMO_1329       | NC10 bacterium 'Dutch sediment'                                    | 886 |
| 1483 | D5N5H8 | D5N5H8_BACSU | Bacteria | alaS_BSU6633_18827   | Bacillus subtilis subsp. spizizenii ATCC 6633                      | 878 |
| 1484 | D5NCY4 | D5NCY4_9BURK | Bacteria | Bch11DRAFT_2255      | Burkholderia sp. Ch1-1                                             | 874 |
| 1485 | D5NUR8 | D5NUR8_CORAM | Bacteria | HMPREF0281_00317     | Corynebacterium ammoniagenes DSM 20306                             | 902 |
| 1486 | D5PI02 | D5PI02_9MYCO | Bacteria | alaS_HMPREF0591_5796 | Mycobacterium parascrofulaceum ATCC BAA-614                        | 901 |
| 1487 | D5PM45 | D5PM45_COREQ | Bacteria | alaS_HMPREF0724_0783 | Rhodococcus equi ATCC 33707                                        | 890 |
| 1488 | D5Q5T1 | D5Q5T1_CLODI | Bacteria | alaS_HMPREF0220_2263 | Clostridium difficile NAP08                                        | 879 |
| 1489 | D5QVL1 | D5QVL1_METTR | Bacteria | MettrDRAFT_3837      | Methylosinus trichosporium OB3b                                    | 897 |
| 1490 | D5R9H2 | D5R9H2_9FIRM | Bacteria | CioleDRAFT_4228      | Clostridium lentocellum DSM 5427                                   | 881 |
| 1491 | D5RBP3 | D5RBP3_FUSNN | Bacteria | alaS_HMPREF0397_0628 | Fusobacterium nucleatum subsp. nucleatum ATCC 23726                | 867 |
| 1492 | D5RQH1 | D5RQH1_9PROT | Bacteria | alaS_HMPREF0731_3333 | Roseomonas cervicalis ATCC 49957                                   | 881 |
| 1493 | D5S2S5 | D5S2S5_CLODI | Bacteria | alaS_HMPREF0219_2856 | Clostridium difficile NAP07                                        | 879 |
| 1494 | D5S8Y2 | D5S8Y2_STRPA | Bacteria | alaS_HMPREF0833_1423 | Streptococcus parasanguinis ATCC 15912                             | 872 |
| 1495 | D5T1D1 | D5T1D1_LEUKI | Bacteria | LKI_02685            | Leuconostoc kimchii (strain IMSNU 11154 / KCTC 2386 / IH25)        | 893 |
| 1496 | D5TE56 | D5TE56_LEGP2 | Bacteria | alaS_lpa_02602       | Legionella pneumophila serogroup 1 (strain 2300/99 Alcovy)         | 860 |

|      |         |               |          |                       |                                                                     |     |
|------|---------|---------------|----------|-----------------------|---------------------------------------------------------------------|-----|
| 1497 | D5THB6  | D5THB6 BIFAV  | Bacteria | alaS BalV_0904        | Bifidobacterium animalis subsp. lactis (strain V9)                  | 899 |
| 1498 | D5TYE9  | D5TYE9 BACT1  | Bacteria | alaS BMB171_C4050     | Bacillus thuringiensis (strain BMB171)                              | 880 |
| 1499 | D5U940  | D5U940 BRAM5  | Bacteria | Bmur_1118             | Brachyspira murdochii (strain ATCC 51284 / DSM 12563 / 56-150)      | 857 |
| 1500 | D5UEQ5  | D5UEQ5 CELFN  | Bacteria | Cfla_1818             | Cellulomonas flavigena (strain ATCC 482 / DSM 20109 / NCIB 8073)    | 897 |
| 1501 | D5UNL9  | D5UNL9 TSUPD  | Bacteria | Tpau_1975             | Tsukamurella paurometabola (strain ATCC 8368 / DSM 20162 / JCM 890) | 890 |
| 1502 | D5V5R8  | D5V5R8 AR CNC | Bacteria | Amit_0439             | Arcobacter nitrofigilis (strain ATCC 33309 / DSM 7299 / LMG 7604)   | 850 |
| 1503 | D5VB09  | D5VB09 MORCR  | Bacteria | alaS MCR_0591         | Moraxella catarrhalis (strain RH4)                                  | 893 |
| 1504 | D5VFE6  | D5VFE6 CAUST  | Bacteria | Cseg_1177             | Caulobacter segnis (strain ATCC 21756 / DSM 7131 / JCM 7823 / N)    | 880 |
| 1505 | D5W9R5  | D5W9R5 BURSC  | Bacteria | BC1002_2061           | Burkholderia sp. (strain CCGE1002)                                  | 874 |
| 1506 | D5WWZ3  | D5WWZ3 BACT2  | Bacteria | Btus_1107             | Bacillus tusciae (strain DSM 2912 / NBRC 15312 / T2)                | 878 |
| 1507 | D5WY65  | D5WY65 THIK1  | Bacteria | Tint_0778             | Thiomonas intermedia (strain K12) (Thiobacillus intermedius)        | 917 |
| 1508 | D5X833  | D5X833 THEPJ  | Bacteria | TherJR_1904           | Thermincola potens (strain JR)                                      | 884 |
| 1509 | D5XWK0  | D5XWK0 MYCTU  | Bacteria | TBDG_04014            | Mycobacterium tuberculosis T92                                      | 904 |
| 1510 | D5Y5E2  | D5Y5E2 MYCTU  | Bacteria | TBEG_01363            | Mycobacterium tuberculosis T85                                      | 702 |
| 1511 | D5YKF0  | D5YKF0 MYCTU  | Bacteria | TBGG_01761            | Mycobacterium tuberculosis EAS054                                   | 904 |
| 1512 | D5YUW6  | D5YUW6 MYCTU  | Bacteria | TBBG_02566            | Mycobacterium tuberculosis 02_1987                                  | 904 |
| 1513 | D5ZJ76  | D5ZJ76 MYCTU  | Bacteria | TBJG_03812            | Mycobacterium tuberculosis T17                                      | 797 |
| 1514 | D5ZTK9  | D5ZTK9 9ACTO  | Bacteria | SSFG_05875            | Streptomyces ghanaensis ATCC 14672                                  | 889 |
| 1515 | D6AKE1  | D6AKE1 STRFL  | Bacteria | SSGG_00588            | Streptomyces roseosporus NRRL 15998                                 | 889 |
| 1516 | D6B972  | D6B972 9ACTO  | Bacteria | SSHG_00604            | Streptomyces albus J1074                                            | 890 |
| 1517 | D6B9N4  | D6B9N4 9ACTO  | Bacteria | SSHG_02719            | Streptomyces albus J1074                                            | 740 |
| 1518 | D6BH18  | D6BH18 9FUSO  | Bacteria | PSAG_01500            | Fusobacterium sp. D11                                               | 867 |
| 1519 | D6CKW3  | D6CKW3 THIS3  | Bacteria | alaS THI_1018         | Thiomonas sp. (strain 3As)                                          | 917 |
| 1520 | D6D127  | D6D127 9BACE  | Bacteria | BXY_31190             | Bacteroides xylanisolvens XB1A                                      | 872 |
| 1521 | D6D8W6  | D6D8W6 BIFLO  | Bacteria | BIL_11000             | Bifidobacterium longum subsp. longum F8                             | 893 |
| 1522 | D6DX51  | D6DX51 ENTCL  | Bacteria | ENC_29420             | Enterobacter cloacae subsp. cloacae NCTC 9394                       | 875 |
| 1523 | D6E522  | D6E522 9FIRM  | Bacteria | EUR_14190             | Eubacterium rectale DSM 17629                                       | 886 |
| 1524 | D6E903  | D6E903 9ACTN  | Bacteria | GPA_17180             | Gordonibacter pamelaeeae 7-10-1-b                                   | 882 |
| 1525 | D6EPS6  | D6EPS6 STRLI  | Bacteria | SSPG_06054            | Streptomyces lividans TK24                                          | 890 |
| 1526 | D6FJC2  | D6FJC2 MYCTU  | Bacteria | TBNG_03198            | Mycobacterium tuberculosis CPHL_A                                   | 828 |
| 1527 | D6FYU7  | D6FYU7 MYCTU  | Bacteria | TBOG_03105            | Mycobacterium tuberculosis K85                                      | 750 |
| 1528 | D6FYU9  | D6FYU9 MYCTU  | Bacteria | TBOG_03107            | Mycobacterium tuberculosis K85                                      | 904 |
| 1529 | D6GI32  | D6GI32 9ENTR  | Bacteria | HMPREF0485_02767      | Klebsiella sp. 1_1_55                                               | 875 |
| 1530 | D6GRR3  | D6GRR3 9FIRM  | Bacteria | HMPREF0389_00269      | Filifactor alocis ATCC 35896                                        | 881 |
| 1531 | D6H016  | D6H016 STAAU  | Bacteria | SAVG_02191            | Staphylococcus aureus subsp. aureus M1015                           | 876 |
| 1532 | D6HBI7  | D6HBI7 NEIGO  | Bacteria | NGMG_02151            | Neisseria gonorrhoeae DG12                                          | 881 |
| 1533 | D6HHH9  | D6HHH9 STAAU  | Bacteria | SCAG_02020            | Staphylococcus aureus subsp. aureus 58-424                          | 876 |
| 1534 | D6HLR4  | D6HLR4 9FIRM  | Bacteria | HMPREF0863_00733      | Erysipelotrichaceae bacterium 5_2_54FAA                             | 893 |
| 1535 | D6I007  | D6I007 ECOLX  | Bacteria | ECCG_02038            | Escherichia coli B088                                               | 876 |
| 1536 | D6ICC9  | D6ICC9 ECOLX  | Bacteria | ECDG_03542            | Escherichia coli B185                                               | 876 |
| 1537 | D6IU34  | D6IU34 ECOLX  | Bacteria | ECCG_01479            | Escherichia coli FVEC1412                                           | 876 |
| 1538 | D6J139  | D6J139 STAAU  | Bacteria | SAZG_01645            | Staphylococcus aureus subsp. aureus M809                            | 876 |
| 1539 | D6JE36  | D6JE36 ECOLX  | Bacteria | ECEG_02054            | Escherichia coli B354                                               | 876 |
| 1540 | D6JNT3  | D6JNT3 NEIGO  | Bacteria | NGNG_01894            | Neisseria gonorrhoeae F62                                           | 881 |
| 1541 | D6JR62  | D6JR62 ACIG3  | Bacteria | HMPREF0013_00826      | Acinetobacter sp. SH024                                             | 878 |
| 1542 | D6K7I5  | D6K7I5 9ACTO  | Bacteria | SSTG_00346            | Streptomyces sp. e14                                                | 890 |
| 1543 | D6KIG8  | D6KIG8 9FIRM  | Bacteria | HMPREF0873_00565      | Veillonella sp. 3_1_44                                              | 871 |
| 1544 | D6KNL7  | D6KNL7 9FIRM  | Bacteria | HMPREF0874_00548      | Veillonella sp. 6_1_27                                              | 871 |
| 1545 | D6KU97  | D6KU97 SCAIO  | Bacteria | HMPREF9020_00679      | Scardovia inopinata F0304                                           | 900 |
| 1546 | D6KXZ4  | D6KXZ4 9NEIS  | Bacteria | HMPREF9021_00544      | Simonsiella muelleri ATCC 29453                                     | 873 |
| 1547 | D6L5E3  | D6L5E3 PARDN  | Bacteria | HMPREF9017_00733      | Parascardovia denticolens F0305                                     | 903 |
| 1548 | D6LC80  | D6LC80 9FUSO  | Bacteria | HMPREF0405_01073      | Fusobacterium sp. 3_1_27                                            | 867 |
| 1549 | D6LHW0  | D6LHW0 9FUSO  | Bacteria | HMPREF0400_01320      | Fusobacterium sp. 1_1_41FAA                                         | 867 |
| 1550 | D6LKP1  | D6LKP1 9RHIZ  | Bacteria | BAZG_01464            | Brucella sp. NVSL 07-0026                                           | 885 |
| 1551 | D6LYH6  | D6LYH6 STAAU  | Bacteria | SIAG_00724            | Staphylococcus aureus subsp. aureus EMRSA16                         | 877 |
| 1552 | D6M8Z1  | D6M8Z1 9CLOT  | Bacteria | alaS CLCAR_0879       | Clostridium carboxidivorans P7                                      | 879 |
| 1553 | D6RX64  | D6RX64 BORVA  | Bacteria | BVAVS116_0220         | Borrelia valaisiana VS116                                           | 594 |
| 1554 | D6S339  | D6S339 9LACO  | Bacteria | alaS HMPREF0526_10639 | Lactobacillus jensenii JV-V16                                       | 878 |
| 1555 | D6SA94  | D6SA94 PEPMA  | Bacteria | alaS HMPREF0391_11366 | Finexgoldia magna ATCC 53516                                        | 873 |
| 1556 | D6SI27  | D6SI27 STAAU  | Bacteria | alaS HMPREF0769_12061 | Staphylococcus aureus subsp. aureus MN8                             | 877 |
| 1557 | D6SNX2  | D6SNX2 9DELT  | Bacteria | Dthio_PD1807          | Desulfonatronospira thiodismutans ASO3-1                            | 882 |
| 1558 | D6SVZ5  | D6SVZ5 GARVA  | Bacteria | GVAMD_0868            | Gardnerella vaginalis AMD                                           | 894 |
| 1559 | D6T0G2  | D6T0G2 GARVA  | Bacteria | GV51_1076             | Gardnerella vaginalis 5-1                                           | 894 |
| 1560 | D6T7Y6  | D6T7Y6 STAAU  | Bacteria | SLAG_01771            | Staphylococcus aureus A8796                                         | 876 |
| 1561 | D6TGE6  | D6TGE6 9CHLR  | Bacteria | Krac_12285            | Ktedonobacter racemifer DSM 44963                                   | 880 |
| 1562 | D6U9T8  | D6U9T8 STAAU  | Bacteria | alaS HMPREF0782_0279  | Staphylococcus aureus subsp. aureus ATCC 51811                      | 876 |
| 1563 | D6V296  | D6V296 9BRAD  | Bacteria | AfiDRAFT_0062         | Afia sp. 1NLS2                                                      | 888 |
| 1564 | D6XWW8  | D6XWW8 BACIE  | Bacteria | Bsel_2442             | Bacillus selenitireducens (strain ATCC 700615 / DSM 15326 / MLS1)   | 877 |
| 1565 | D6Y2B0  | D6Y2B0 THEBD  | Bacteria | Tbis_2047             | Thermobispora bispora (strain ATCC 19993 / DSM 43833 / CBS 139)     | 889 |
| 1566 | D6YBW1  | D6YBW1 CHLT5  | Bacteria | alaS E150_03990       | Chlamydia trachomatis serovar E (strain E/150)                      | 875 |
| 1567 | D6YGN2  | D6YGN2 CHLT7  | Bacteria | alaS G9768_03965      | Chlamydia trachomatis serovar G (strain G/9768)                     | 875 |
| 1568 | D6YJA1  | D6YJA1 CHLT0  | Bacteria | alaS G11222_03985     | Chlamydia trachomatis serovar G (strain G/11222)                    | 874 |
| 1569 | D6Y LX2 | D6Y LX2 CHLTG | Bacteria | alaS G11074_03960     | Chlamydia trachomatis serovar G (strain G/11074)                    | 875 |
| 1570 | D6YNN3  | D6YNN3 CHLT1  | Bacteria | alaS E11023_03955     | Chlamydia trachomatis serovar E (strain E/11023)                    | 875 |
| 1571 | D6YTZ8  | D6YTZ8 WADCW  | Bacteria | alaS wcv_0234         | Waddlia chondrophila (strain ATCC VR-1470 / WSU 86-1044)            | 870 |
| 1572 | D6YZB0  | D6YZB0 CHLT9  | Bacteria | alaS CTG9301_03975    | Chlamydia trachomatis serovar G (strain G/9301)                     | 875 |
| 1573 | D6Z4V7  | D6Z4V7 DESAT  | Bacteria | alaS DaAHT2_1902      | Desulfurivibrio alkaliphilus (strain DSM 19089 / UNIQEM U267 / AH)  | 879 |



|      |        |               |          |                       |                                                                     |      |
|------|--------|---------------|----------|-----------------------|---------------------------------------------------------------------|------|
| 1574 | D6Z879 | D6Z879 SEGRD  | Bacteria | Srot_1699             | Segniliparus rotundus (strain ATCC BAA-972 / CDC 1076 / CIP 108)    | 892  |
| 1575 | D6ZHD8 | D6ZHD8 MOBCV  | Bacteria | alaS HMPREF0573_11727 | Mobiluncus curtisii (strain ATCC 43063 / DSM 2711 / V125) (Falcivi) | 895  |
| 1576 | D6ZS03 | D6ZS03 STRP0  | Bacteria | alaS HMPREF0837_11164 | Streptococcus pneumoniae serotype A19 (strain TCH8431)              | 872  |
| 1577 | D6ZTY0 | D6ZTY0 BIFLJ  | Bacteria | alaS BLJ_0870         | Bifidobacterium longum subsp. longum (strain JDM301)                | 871  |
| 1578 | D7A1A0 | D7A1A0 STAND  | Bacteria | Snov_2162             | Starkeya novella (strain ATCC 8093 / DSM 506 / CCM 1077 / IAM 1)    | 883  |
| 1579 | D7AM59 | D7AM59 GEOSK  | Bacteria | KN400_0124            | Geobacter sulfurreducens (strain DL-1 / KN400)                      | 875  |
| 1580 | D7ANP8 | D7ANP8 THEM3  | Bacteria | Tmath_1096            | Thermoanaerobacter mathranii (strain DSM 11426 / CIP 108742 / J)    | 877  |
| 1581 | D7B1Q8 | D7B1Q8 NOCDD  | Bacteria | Ndas_3075             | Nocardiopsis dassonvillei (strain ATCC 23218 / DSM 43111 / IMRU)    | 888  |
| 1582 | D7BHC9 | D7BHC9 MEISD  | Bacteria | Mesil_0223            | Meiothermus silvanus (strain ATCC 700542 / DSM 9946 / VI-R2) (T)    | 894  |
| 1583 | D7BNR9 | D7BNR9 ARCHD  | Bacteria | Arch_0842             | Arcanobacterium haemolyticum (strain ATCC 9345 / DSM 20595 / N)     | 890  |
| 1584 | D7BWW4 | D7BWW4 STRBB  | Bacteria | alaS SBI_02378        | Streptomyces bingchengensis (strain BCW-1)                          | 889  |
| 1585 | D7CK26 | D7CK26 SYNLT  | Bacteria | Slip_0356             | Syntrophothermus lipocalidus (strain DSM 12680 / TGB-C1)            | 877  |
| 1586 | D7D2X1 | D7D2X1 GEOSC  | Bacteria | GC56T3_0936           | Geobacillus sp. (strain C56-T3)                                     | 878  |
| 1587 | D7DEM1 | D7DEM1 CHLTD  | Bacteria | alaS CTDEC_0749       | Chlamydia trachomatis serovar D (strain D-EC)                       | 924  |
| 1588 | D7DFC0 | D7DFC0 CHLTL  | Bacteria | alaS CTDL_0749        | Chlamydia trachomatis serovar D (strain D-LC)                       | 924  |
| 1589 | D7DL84 | D7DL84 METSO  | Bacteria | M301_2187             | Methylotenera sp. (strain 301)                                      | 901  |
| 1590 | D7E1R7 | D7E1R7 NOSA0  | Bacteria | Aazo_3088             | Nostoc azollae (strain 0708) (Anabaena azollae (strain 0708))       | 880  |
| 1591 | D7EUQ1 | D7EUQ1 MYCTU  | Bacteria | TBAG_01444            | Mycobacterium tuberculosis 94_M4241A                                | 750  |
| 1592 | D7GDR7 | D7GDR7 PROFC  | Bacteria | alaS PFREUD_11560     | Propionibacterium freudenreichii subsp. shermanii (strain ATCC 961) | 895  |
| 1593 | D7GW56 | D7GW56 9FIRM  | Bacteria | CK3_25040             | Butyrate-producing bacterium SS3/4                                  | 884  |
| 1594 | D7GYU9 | D7GYU9 BRUAB  | Bacteria | BAYG_01466            | Brucella abortus bv. 5 str. B3196                                   | 885  |
| 1595 | D7HDP4 | D7HDP4 VIBCH  | Bacteria | VCRC385_03289         | Vibrio cholerae RC385                                               | 860  |
| 1596 | D7I349 | D7I349 PSESS  | Bacteria | PSA3335_3617          | Pseudomonas savastanoi pv. savastanoi NCPPB 3335                    | 874  |
| 1597 | D7IBD5 | D7IBD5 9BACE  | Bacteria | HMPREF9007_01576      | Bacteroides sp. 1_1_14                                              | 872  |
| 1598 | D7IV30 | D7IV30 9BACE  | Bacteria | HMPREF0104_03303      | Bacteroides sp. 3_1_19                                              | 873  |
| 1599 | D7J000 | D7J000 9BACE  | Bacteria | HMPREF0106_00735      | Bacteroides sp. D22                                                 | 872  |
| 1600 | D7JDI2 | D7JDI2 9BACT  | Bacteria | HMPREF0156_00670      | Bacteroidetes oral taxon 274 str. F0058                             | 867  |
| 1601 | D7JSL6 | D7JSL6 ECOLX  | Bacteria | ECFG_01664            | Escherichia coli FVE1302                                            | 876  |
| 1602 | D7K870 | D7K870 9BACE  | Bacteria | HMPREF9010_02582      | Bacteroides sp. 3_1_23                                              | 872  |
| 1603 | D7MZG7 | D7MZG7 9NEIS  | Bacteria | HMPREF9016_00350      | Neisseria sp. oral taxon 014 str. F0314                             | 1021 |
| 1604 | D7N6D0 | D7N6D0 9FIRM  | Bacteria | HMPREF0629_01093      | Peptoniphilus sp. oral taxon 386 str. F0131                         | 874  |
| 1605 | D7NCY0 | D7NCY0 9BACT  | Bacteria | HMPREF0665_01395      | Prevotella oris C735                                                | 886  |
| 1606 | D7UIY6 | D7UIY6 LISMO  | Bacteria | LMHG_12583            | Listeria monocytogenes FSL N1-017                                   | 879  |
| 1607 | D7UZ50 | D7UZ50 LISGR  | Bacteria | alaS HMPREF0556_12302 | Listeria grayi DSM 20601                                            | 876  |
| 1608 | D7V4Y4 | D7V4Y4 9LACO  | Bacteria | alaS HMPREF0514_11184 | Lactobacillus gasseri JV-V03                                        | 882  |
| 1609 | D7VB91 | D7VB91 LACPL  | Bacteria | alaS HMPREF0531_11414 | Lactobacillus plantarum subsp. plantarum ATCC 14917                 | 880  |
| 1610 | D7VJ27 | D7VJ27 9SPHI  | Bacteria | alaS HMPREF0766_10996 | Sphingobacterium spiritivorum ATCC 33861                            | 893  |
| 1611 | D7WCH1 | D7WCH1 9CORY  | Bacteria | alaS HMPREF0291_11509 | Corynebacterium genitalium ATCC 33030                               | 893  |
| 1612 | D7WKR4 | D7WKR4 BACCE  | Bacteria | alaS BCSJ1_23259      | Bacillus cereus S31                                                 | 880  |
| 1613 | D7WQH3 | D7WQH3 9BACI  | Bacteria | BFZC1_06773           | Lysinibacillus fusiformis ZC1                                       | 886  |
| 1614 | D7XBF4 | D7XBF4 ECOLX  | Bacteria | HMPREF9552_04001      | Escherichia coli MS 198-1                                           | 784  |
| 1615 | D7XUK6 | D7XUK6 ECOLX  | Bacteria | HMPREF9536_04765      | Escherichia coli MS 84-1                                            | 784  |
| 1616 | D7Y5Y9 | D7Y5Y9 ECOLX  | Bacteria | HMPREF9540_03004      | Escherichia coli MS 115-1                                           | 784  |
| 1617 | D7YIN5 | D7YIN5 ECOLX  | Bacteria | HMPREF9548_02416      | Escherichia coli MS 182-1                                           | 784  |
| 1618 | D7YW33 | D7YW33 ECOLX  | Bacteria | HMPREF9531_01429      | Escherichia coli MS 45-1                                            | 784  |
| 1619 | D7ZLS8 | D7ZLS8 ECOLX  | Bacteria | HMPREF9534_05260      | Escherichia coli MS 69-1                                            | 784  |
| 1620 | D7ZVK7 | D7ZVK7 ECOLX  | Bacteria | HMPREF9550_02829      | Escherichia coli MS 187-1                                           | 784  |
| 1621 | D8AGN4 | D8AGN4 ECOLX  | Bacteria | HMPREF9530_05757      | Escherichia coli MS 21-1                                            | 784  |
| 1622 | D8AIR9 | D8AIR9 ECOLX  | Bacteria | HMPREF9541_00645      | Escherichia coli MS 116-1                                           | 784  |
| 1623 | D8AZ24 | D8AZ24 ECOLX  | Bacteria | HMPREF9547_00846      | Escherichia coli MS 175-1                                           | 784  |
| 1624 | D8BC88 | D8BC88 ECOLX  | Bacteria | HMPREF9553_00577      | Escherichia coli MS 200-1                                           | 784  |
| 1625 | D8BZS7 | D8BZS7 ECOLX  | Bacteria | HMPREF9551_03175      | Escherichia coli MS 196-1                                           | 839  |
| 1626 | D8CGR8 | D8CGR8 ECOLX  | Bacteria | HMPREF9549_03540      | Escherichia coli MS 185-1                                           | 784  |
| 1627 | D8D4Y1 | D8D4Y1 COMTE  | Bacteria | alaS CTS44_09257      | Comamonas testosteroni S44                                          | 874  |
| 1628 | D8DT48 | D8DT48 PREBR  | Bacteria | alaS PBR_0727         | Prevotella bryantii B14                                             | 888  |
| 1629 | D8E1G5 | D8E1G5 ECOLX  | Bacteria | HMPREF9346_00268      | Escherichia coli MS 119-7                                           | 784  |
| 1630 | D8EIJ4 | D8EIJ4 ECOLX  | Bacteria | HMPREF9345_00933      | Escherichia coli MS 107-1                                           | 784  |
| 1631 | D8FEI5 | D8FEI5 9DELTA | Bacteria | alaS NPH_1793         | Delta proteobacterium NaphS2                                        | 880  |
| 1632 | D8FJ12 | D8FJ12 9FIRM  | Bacteria | alaS HMPREF9131_1203  | Peptoniphilus sp. oral taxon 836 str. F0141                         | 874  |
| 1633 | D8FMC1 | D8FMC1 LACDE  | Bacteria | alaS HMPREF9264_0846  | Lactobacillus delbrueckii subsp. bulgaricus PB2003/044-T3-4         | 877  |
| 1634 | D8G7C7 | D8G7C7 9CYAN  | Bacteria | alaS OSCI_3800047     | Oscillatoria sp. PCC 6506                                           | 879  |
| 1635 | D8GEM3 | D8GEM3 LACCZ  | Bacteria | LCAZH_0727            | Lactobacillus casei (strain Zhang)                                  | 881  |
| 1636 | D8GRE5 | D8GRE5 CLOLD  | Bacteria | alaS CLJU_c12150      | Clostridium ljungdahlii (strain ATCC 55383 / DSM 13528 / PETC)      | 879  |
| 1637 | D8GWE1 | D8GWE1 BACAI  | Bacteria | alaS2 BACI_c43740     | Bacillus cereus var. anthracis (strain CI)                          | 880  |
| 1638 | D8HBT6 | D8HBT6 STAAP  | Bacteria | alaS SAOV_1616        | Staphylococcus aureus subsp. aureus (strain ED133)                  | 876  |
| 1639 | D8HY66 | D8HY66 AMYMU  | Bacteria | alaS AMED_2713        | Amycolatopsis mediterranei (strain U-32)                            | 886  |
| 1640 | D8IDK2 | D8IDK2 BRAP9  | Bacteria | alaS BP951000_1236    | Brachyspira pilosicoli (strain ATCC BAA-1826 / 95/1000)             | 864  |
| 1641 | D8IH66 | D8IH66 LACFC  | Bacteria | LC40_0353             | Lactobacillus fermentum (strain CECT 5716)                          | 882  |
| 1642 | D8ILN9 | D8ILN9 LACSC  | Bacteria | alaS HN6_00916        | Lactobacillus salivarius (strain CECT 5713)                         | 423  |
| 1643 | D8IQI0 | D8IQI0 HERSS  | Bacteria | alaS Hsero_3614       | Herbaspirillum seropedicae (strain SmR1)                            | 874  |
| 1644 | D8JP25 | D8JP25 ACISD  | Bacteria | alaS AOLE_13560       | Acinetobacter sp. (strain JCM 1667 / KCTC 23045 / DR1)              | 883  |
| 1645 | D8JQG9 | D8JQG9 HYPDA  | Bacteria | Hden_2124             | Hyphomicrobium denitrificans (strain ATCC 51888 / DSM 1869 / NC)    | 897  |
| 1646 | D8K228 | D8K228 DEHLB  | Bacteria | Dehly_1367            | Dehalogenimonas lykanthroporepellens (strain ATCC BAA-1523 / JC)    | 856  |
| 1647 | D8KBY5 | D8KBY5 NITWC  | Bacteria | alaS Nwat_0794        | Nitrosococcus watsoni (strain C-113)                                | 874  |
| 1648 | D8KD77 | D8KD77 LACLN  | Bacteria | alaS LLN2_09815       | Lactococcus lactis subsp. cremoris (strain NZ9000)                  | 872  |
| 1649 | D8KMX6 | D8KMX6 CORPF  | Bacteria | alaS cpfrc_01150      | Corynebacterium pseudotuberculosis (strain FRC41)                   | 890  |
| 1650 | D8MGL8 | D8MGL8 LEUGT  | Bacteria | alaS LEGAS_1338       | Leuconostoc gasicomitatum (strain DSM 15947 / CECT 5767 / JCM)      | 893  |

|      |        |              |          |                          |                                                                        |     |
|------|--------|--------------|----------|--------------------------|------------------------------------------------------------------------|-----|
| 1651 | D8MW05 | D8MW05 ERWBE | Bacteria | alaS EbC_34810           | Erwinia billingiae (strain Eb661)                                      | 875 |
| 1652 | D8N6B0 | D8N6B0 RALSO | Bacteria | alaS CMR15_30103         | Ralstonia solanacearum (Pseudomonas solanacearum)                      | 888 |
| 1653 | D8NMJ5 | D8NMJ5 RALSO | Bacteria | alaS RCFBP_20624         | Ralstonia solanacearum (Pseudomonas solanacearum)                      | 880 |
| 1654 | D8NWW3 | D8NWW3 RALSO | Bacteria | alaS RPSI07_2546         | Ralstonia solanacearum (Pseudomonas solanacearum)                      | 880 |
| 1655 | D8PDY1 | D8PDY1_9BACT | Bacteria | alaS NIDE1707            | Candidatus Nitrospira defluvii                                         | 876 |
| 1656 | D8UPX0 | D8UPX0_9MICC | Bacteria | HMPREF0734_00372         | Rothia dentocariosa M567                                               | 893 |
| 1657 | D9I357 | D9I357_9RICK | Bacteria |                          | Candidatus Odysseella thessalonicensis                                 | 865 |
| 1658 | D9N6G9 | D9N6G9_STRPN | Bacteria | CGSSpBS458_11598         | Streptococcus pneumoniae BS458                                         | 872 |
| 1659 | D9NCY9 | D9NCY9_STRPN | Bacteria | CGSSpBS457_02702         | Streptococcus pneumoniae BS457                                         | 872 |
| 1660 | D9NLG8 | D9NLG8_STRPN | Bacteria | CGSSpBS397_10505         | Streptococcus pneumoniae BS397                                         | 872 |
| 1661 | D9NRY4 | D9NRY4_STRPN | Bacteria | CGSSp14BS292_04630       | Streptococcus pneumoniae SP14-BS292                                    | 872 |
| 1662 | D9NXE0 | D9NXE0_STRPN | Bacteria | CGSSpBS293_10943         | Streptococcus pneumoniae SP-BS293                                      | 872 |
| 1663 | D9P885 | D9P885_ACTPL | Bacteria | alaS APP2_0883           | Actinobacillus pleuropneumoniae serovar 2 str. 4226                    | 874 |
| 1664 | D9P907 | D9P907_ACTPL | Bacteria | alaS APP6_1039 appser6_7 | Actinobacillus pleuropneumoniae serovar 6 str. Femo                    | 874 |
| 1665 | D9PSG2 | D9PSG2_PEPMA | Bacteria | alaS HMPREF9261_0671     | Finexgoldia magna ACS-171-V-Col3                                       | 873 |
| 1666 | D9Q8N6 | D9Q8N6_CORP1 | Bacteria | alaS Cp1002_1147         | Corynebacterium pseudotuberculosis (strain 1002)                       | 890 |
| 1667 | D9QAP6 | D9QAP6_CORP2 | Bacteria | alaS CpC231_1146         | Corynebacterium pseudotuberculosis (strain C231)                       | 890 |
| 1668 | D9QF01 | D9QF01_BRESC | Bacteria | alaS Bresu_1174          | Brevundimonas subvibrioides (strain ATCC 15264 / DSM 4735 / LM         | 881 |
| 1669 | D9QUP9 | D9QUP9_ACEAZ | Bacteria | alaS Acear_0411          | Acetohalobium arabaticum (strain ATCC 49924 / DSM 5501 / Z-728         | 875 |
| 1670 | D9R1A5 | D9R1A5_CLOSW | Bacteria | alaS Closa_2073          | Clostridium saccharolyticum (strain ATCC 35040 / DSM 2544 / NRC        | 879 |
| 1671 | D9RHR3 | D9RHR3_STAAJ | Bacteria | alaS SAA6159_01551       | Staphylococcus aureus (strain JKD6159)                                 | 876 |
| 1672 | D9RKL2 | D9RKL2_STAAK | Bacteria | alaS SAA6008_01588       | Staphylococcus aureus (strain JKD6008)                                 | 877 |
| 1673 | D9RSA3 | D9RSA3_PREMB | Bacteria | alaS HMPREF0659_A6070    | Prevotella melaninogenica (strain ATCC 25845 / DSM 7089 / JCM 6        | 887 |
| 1674 | D9RXN6 | D9RXN6_THEOJ | Bacteria | alaS Toce_1355           | Thermosediminibacter oceani (strain ATCC BAA-1034 / DSM 16646          | 880 |
| 1675 | D9SAE5 | D9SAE5_FIBSS | Bacteria | alaS FSU_1489            | Fibroacterium succinigenes (strain ATCC 19169 / S85)                   | 882 |
| 1676 | D9SC89 | D9SC89_GALCS | Bacteria | alaS Galf_0510           | Gallionella capsiferriformans (strain ES-2) (Gallionella ferruginea ca | 873 |
| 1677 | D9SL58 | D9SL58_CLOC7 | Bacteria | alaS Clocel_1830         | Clostridium cellulovorans (strain ATCC 35296 / DSM 3052 / OCM 3        | 879 |
| 1678 | D9T5Q9 | D9T5Q9_MICAI | Bacteria | alaS Micau_2317          | Micromonospora aurantiaca (strain ATCC 27029 / DSM 43813 / JCM         | 893 |
| 1679 | D9TKI6 | D9TKI6_CALOO | Bacteria | alaS COB47_1226          | Caldicellulosiruptor obsidiansis (strain ATCC BAA-2073 / strain OB4    | 881 |
| 1680 | D9TPU4 | D9TPU4_THETC | Bacteria | alaS Tthe_1262           | Thermoanaerobacterium thermosaccharolyticum (strain ATCC 7956          | 879 |
| 1681 | D9UCB5 | D9UCB5_9ACTO | Bacteria | SSLG_00742               | Streptomyces sp. SPB78                                                 | 889 |
| 1682 | D9UZ75 | D9UZ75_9ACTO | Bacteria | SSMG_02218               | Streptomyces sp. AA4                                                   | 887 |
| 1683 | D9VK65 | D9VK65_9ACTO | Bacteria | SSNG_01348               | Streptomyces sp. C                                                     | 889 |
| 1684 | D9WPF1 | D9WPF1_STRHY | Bacteria | SSOG_01528               | Streptomyces hygroscopicus ATCC 53653                                  | 828 |
| 1685 | D9XID8 | D9XID8_STRVR | Bacteria | SSQG_01372               | Streptomyces viridochromogenes DSM 40736                               | 890 |
| 1686 | D9XUT8 | D9XUT8_9ACTO | Bacteria | SSRG_05238               | Streptomyces griseoflavus Tu4000                                       | 890 |
| 1687 | D9Y6V6 | D9Y6V6_9BURK | Bacteria | HMPREF0189_01261         | Burkholderiales bacterium 1_1_47                                       | 875 |
| 1688 | D9YB19 | D9YB19_9DELT | Bacteria | HMPREF0326_00998         | Desulfovibrio sp. 3_1_syn3                                             | 892 |
| 1689 | E0DF71 | E0DF71_9CORY | Bacteria | alaS HMPREF0299_6508     | Corynebacterium matruchotii ATCC 14266                                 | 889 |
| 1690 | E0DL72 | E0DL72_9RHIZ | Bacteria | alaS BIBO1_0764          | Brucella sp. BO1                                                       | 885 |
| 1691 | E0DUS5 | E0DUS5_9RHIZ | Bacteria | alaS BROD_0817           | Brucella sp. NF 2653                                                   | 885 |
| 1692 | E0E138 | E0E138_9FIRM | Bacteria | alaS HMPREF0634_0390     | Peptostreptococcus stomatis DSM 17678                                  | 878 |
| 1693 | E0E7D4 | E0E7D4_ACTPL | Bacteria | appser1_7130             | Actinobacillus pleuropneumoniae serovar 1 str. 4074                    | 874 |
| 1694 | E0EDC0 | E0EDC0_ACTPL | Bacteria | appser2_6180             | Actinobacillus pleuropneumoniae serovar 2 str. S1536                   | 874 |
| 1695 | E0EJ11 | E0EJ11_ACTPL | Bacteria | appser4_6520             | Actinobacillus pleuropneumoniae serovar 4 str. M62                     | 874 |
| 1696 | E0EXA3 | E0EXA3_ACTPL | Bacteria | appser9_7100             | Actinobacillus pleuropneumoniae serovar 9 str. CVJ13261                | 874 |
| 1697 | E0F3F7 | E0F3F7_ACTPL | Bacteria | appser10_6780            | Actinobacillus pleuropneumoniae serovar 10 str. D13039                 | 874 |
| 1698 | E0F9Q6 | E0F9Q6_ACTPL | Bacteria | appser11_7190            | Actinobacillus pleuropneumoniae serovar 11 str. 56153                  | 874 |
| 1699 | E0FFU3 | E0FFU3_ACTPL | Bacteria | appser12_6750            | Actinobacillus pleuropneumoniae serovar 12 str. 1096                   | 874 |
| 1700 | E0FLV5 | E0FLV5_ACTPL | Bacteria | appser13_7100            | Actinobacillus pleuropneumoniae serovar 13 str. N273                   | 874 |
| 1701 | E0FS73 | E0FS73_9THEO | Bacteria | ThewiDRAFT_0426          | Thermoanaerobacter wiegelsii Rt8.B1                                    | 877 |
| 1702 | E0G8B7 | E0G8B7_ENTFA | Bacteria | HMPREF9498_03217         | Enterococcus faecalis TX4248                                           | 880 |
| 1703 | E0GEV3 | E0GEV3_ENTFA | Bacteria | HMPREF9514_02102         | Enterococcus faecalis TX0855                                           | 880 |
| 1704 | E0GQX8 | E0GQX8_ENTFA | Bacteria | HMPREF9521_03076         | Enterococcus faecalis TX2134                                           | 880 |
| 1705 | E0GVB7 | E0GVB7_ENTFA | Bacteria | HMPREF9515_01505         | Enterococcus faecalis TX0860                                           | 880 |
| 1706 | E0H4N0 | E0H4N0_ENTFA | Bacteria | HMPREF9505_01531         | Enterococcus faecalis TX0109                                           | 880 |
| 1707 | E0HDI4 | E0HDI4_ENTFA | Bacteria | HMPREF9509_01674         | Enterococcus faecalis TX0411                                           | 880 |
| 1708 | E0HMR1 | E0HMR1_9GAMM | Bacteria | Sbal183DRAFT_1612        | Shewanella baltica OS183                                               | 874 |
| 1709 | E0HXE9 | E0HXE9_9BACT | Bacteria | ThebaDRAFT_1031          | Thermotogales bacterium mesG1.Ag.4.2                                   | 869 |
| 1710 | E0IE04 | E0IE04_9BACL | Bacteria | PaecuDRAFT_3895          | Paenibacillus curdolanolyticus YK9                                     | 877 |
| 1711 | E0IH01 | E0IH01_9GAMM | Bacteria | Sbal175DRAFT_0392        | Shewanella baltica BA175                                               | 874 |
| 1712 | E0J5K6 | E0J5K6_ECOLX | Bacteria | alaS ECW_m2896 EschWD    | Escherichia coli W                                                     | 876 |
| 1713 | E0JDY3 | E0JDY3_RHIME | Bacteria | SinmeDRAFT_2091          | Sinorhizobium meliloti BL225C                                          | 887 |
| 1714 | E0JZ10 | E0JZ10_RHIME | Bacteria | SinmeDRAFT_2411          | Sinorhizobium meliloti AK83                                            | 887 |
| 1715 | E0KLY1 | E0KLY1_STRVO | Bacteria | StrviDRAFT_3658          | Streptomyces violaceusniger Tu 4113                                    | 890 |
| 1716 | E0LFE8 | E0LFE8_SPHCR | Bacteria | SphchDRAFT_0199          | Sphingobium chlorophenicum L-1                                         | 884 |
| 1717 | E0M4K0 | E0M4K0_9ENTR | Bacteria | PanABDRAFT_4319          | Pantoea sp. aB                                                         | 875 |
| 1718 | E0MJM2 | E0MJM2_9RHOB | Bacteria | alaS R2A130_0089         | Ahrensia sp. R2A130                                                    | 884 |
| 1719 | E0MY70 | E0MY70_9CORY | Bacteria | alaS HMPREF0277_1454     | Corynebacterium accolens ATCC 49726                                    | 894 |
| 1720 | E0N1A9 | E0N1A9_9ACTO | Bacteria | alaS HMPREF0574_0183     | Mobiluncus curtisii subsp. curtisii ATCC 35241                         | 895 |
| 1721 | E0N7K2 | E0N7K2_NEIME | Bacteria | alaS HMPREF0602_0482     | Neisseria meningitidis ATCC 13091                                      | 885 |
| 1722 | E0NFU7 | E0NFU7_PEDAC | Bacteria | alaS HMPREF0623_0702     | Pediococcus acidilactici DSM 20284                                     | 881 |
| 1723 | E0NN14 | E0NN14_9FIRM | Bacteria | alaS HMPREF9225_1553     | Peptoniphilus duerdenii ATCC BAA-1640                                  | 874 |
| 1724 | E0NUN2 | E0NUN2_9BACT | Bacteria | alaS HMPREF0658_1887     | Prevotella marshii DSM 16973                                           | 875 |
| 1725 | E0NWX2 | E0NWX2_9FIRM | Bacteria | alaS HMPREF9166_0208     | Selenomonas sp. oral taxon 149 str. 67H29BP                            | 890 |
| 1726 | E0P7T3 | E0P7T3_STAAU | Bacteria | alaS HMPREF0783_1742     | Staphylococcus aureus subsp. aureus ATCC BAA-39                        | 877 |
| 1727 | E0PCF8 | E0PCF8_STREI | Bacteria | alaS HMPREF9319_0531     | Streptococcus bovis ATCC 700338                                        | 888 |



|      |         |               |          |                        |                                                                      |     |
|------|---------|---------------|----------|------------------------|----------------------------------------------------------------------|-----|
| 1728 | EOPIS7  | EOPIS7_STRGY  | Bacteria | alaS HMPREF9352_0663   | Streptococcus gallolyticus subsp. gallolyticus TX20005               | 888 |
| 1729 | EOPRX5  | EOPRX5_STRMT  | Bacteria | alaS HMPREF8571_1292   | Streptococcus mitis ATCC 6249                                        | 872 |
| 1730 | EOPVB9  | EOPVB9_STRPY  | Bacteria | alaS HMPREF0841_0693   | Streptococcus pyogenes ATCC 10782                                    | 872 |
| 1731 | E0Q0G5  | E0Q0G5_9STRE  | Bacteria | alaS HMPREF9189_0546   | Streptococcus sp. oral taxon 071 str. 73H25AP                        | 872 |
| 1732 | E0Q6P9  | E0Q6P9_9BIFI  | Bacteria | alaS HMPREF0168_0807   | Bifidobacterium dentium ATCC 27679                                   | 892 |
| 1733 | E0QIC9  | E0QIC9_9FIRM  | Bacteria | alaS HMPREF0379_0777   | Eubacterium yurii subsp. margaretae ATCC 43715                       | 880 |
| 1734 | E0QRM1  | E0QRM1_9ACTO  | Bacteria | alaS HMPREF0580_1536   | Mobiluncus mulieris ATCC 35239                                       | 894 |
| 1735 | E0QV91  | E0QV91_ECOLX  | Bacteria | alaS ECNC101_10954     | Escherichia coli NC101                                               | 876 |
| 1736 | E0RLR7  | E0RLR7_PAEP6  | Bacteria | alaS PPE_03577         | Paenibacillus polymyxa (strain E681)                                 | 877 |
| 1737 | E0RRW1  | E0RRW1_SPITD  | Bacteria | STHERM_c07990          | Spirochaeta thermophila (strain ATCC 49972 / DSM 6192 / RI 19.B      | 603 |
| 1738 | E0S2J3  | E0S2J3_BUTPB  | Bacteria | alaS bpr_11221         | Butyrivibrio proteoclasticus (strain ATCC 51982 / DSM 14932 / B31    | 884 |
| 1739 | E0SC73  | E0SC73_DICD3  | Bacteria | alaS Dda3937_03152     | Dickeya dadantii (strain 3937) (Erwinia chrysanthemi (strain 3937)   | 875 |
| 1740 | E0SUR5  | E0SUR5_STRZA  | Bacteria | alaS SPAP_1413         | Streptococcus pneumoniae (strain AP200)                              | 872 |
| 1741 | E0T6W7  | E0T6W7_EDWTF  | Bacteria | alaS ETAF_2595         | Edwardsiella tarda (strain FL6-60)                                   | 875 |
| 1742 | E0TEF8  | E0TEF8_PARBH  | Bacteria | alaS PB2503_09959      | Parvularcula bermudensis (strain ATCC BAA-594 / HTCC2503 / KCT       | 884 |
| 1743 | E0TMD0  | E0TMD0_STRZ6  | Bacteria | alaS SP670_0914        | Streptococcus pneumoniae (strain 670-6B)                             | 872 |
| 1744 | E0TUJ4  | E0TUJ4_BACPZ  | Bacteria | alaS BSUW23_13260      | Bacillus subtilis subsp. spizizenii (strain ATCC 23059 / NRRL B-1447 | 878 |
| 1745 | E0U6K3  | E0U6K3_CYAP2  | Bacteria | alaS Cyan7822_2800     | Cyanothece sp. (strain PCC 7822)                                     | 881 |
| 1746 | E0UQQ8  | E0UQQ8_SULAO  | Bacteria | alaS Saut_1886         | Sulfurimonas autotrophica (strain ATCC BAA-671 / DSM 16294 / JC      | 850 |
| 1747 | E0WR43  | E0WR43_9ENTR  | Bacteria | alaS REG_0416          | Candidatus Regiella insecticola LSR1                                 | 893 |
| 1748 | E1CTD1  | E1CTD1_VIBPA  | Bacteria | alaS VIPARP466_2483    | Vibrio parahaemolyticus Peru-466                                     | 860 |
| 1749 | E1DGA0  | E1DGA0_VIBPA  | Bacteria | alaS VIPARAQ4037_1471  | Vibrio parahaemolyticus AQ4037                                       | 860 |
| 1750 | E1DPM1  | E1DPM1_VIBPA  | Bacteria | alaS VIPARAN5034_2693  | Vibrio parahaemolyticus AN-5034                                      | 860 |
| 1751 | E1DVL2  | E1DVL2_LACRE  | Bacteria | alaS HMPREF0538_10136  | Lactobacillus reuteri SD2112                                         | 895 |
| 1752 | E1E7Z4  | E1E7Z4_STAAU  | Bacteria | alaS HMPREF0773_11396  | Staphylococcus aureus subsp. aureus TCH70                            | 876 |
| 1753 | E1EAT8  | E1EAT8_VIBPA  | Bacteria | alaS_2_VIPARK5030_2489 | Vibrio parahaemolyticus K5030                                        | 788 |
| 1754 | E1ES28  | E1ES28_ENTFA  | Bacteria | alaS HMPREF0347_7498   | Enterococcus faecalis TUSoD Ef11                                     | 880 |
| 1755 | E1FDW5  | E1FDW5_9THEO  | Bacteria | Teth561_PD1062         | Thermoanaerobacter sp. X561                                          | 877 |
| 1756 | E1GTD7  | E1GTD7_9BACT  | Bacteria | alaS HMPREF9018_1630   | Prevotella amnii CRIS 21A-A                                          | 884 |
| 1757 | E1H0S2  | E1H0S2_STRPN  | Bacteria | alaS CGSspBS455_03644  | Streptococcus pneumoniae BS455                                       | 872 |
| 1758 | E1HC08  | E1HC08_MYCTU  | Bacteria | TMAG_02359             | Mycobacterium tuberculosis SUMu001                                   | 904 |
| 1759 | E1HLL3  | E1HLL3_ECOLX  | Bacteria | HMPREF9543_01948       | Escherichia coli MS 146-1                                            | 784 |
| 1760 | E1HYU1  | E1HYU1_ECOLX  | Bacteria | HMPREF9535_01259       | Escherichia coli MS 78-1                                             | 784 |
| 1761 | E1IER3  | E1IER3_9CHLR  | Bacteria | OSCT_1814              | Oscillochloris trichoides DG-6                                       | 895 |
| 1762 | E1IQC3  | E1IQC3_ECOLX  | Bacteria | HMPREF9348_02359       | Escherichia coli MS 145-7                                            | 784 |
| 1763 | E1JQA8  | E1JQA8_ECOLX  | Bacteria | HMPREF9347_04037       | Escherichia coli MS 124-1                                            | 784 |
| 1764 | E1JPC2  | E1JPC2_9LACO  | Bacteria | alaS HMPREF9269_2027   | Lactobacillus salivarius ACS-116-V-Col5a                             | 880 |
| 1765 | E1JZR25 | E1JZR25_DESFR | Bacteria | DesfrDRAFT_0394        | Desulfovibrio fructosovorans JJ                                      | 880 |
| 1766 | E1KQH6  | E1KQH6_9BACT  | Bacteria | alaS HMPREF9296_0768   | Prevotella disiens FB035-09AN                                        | 897 |
| 1767 | E1KW97  | E1KW97_PEPMA  | Bacteria | alaS HMPREF9289_0632   | Finegoldia magna BVS033A4                                            | 873 |
| 1768 | E1L1R4  | E1L1R4_9ACTN  | Bacteria | alaS HMPREF9248_1008   | Atopobium vaginae PB189-T1-4                                         | 883 |
| 1769 | E1L599  | E1L599_9FIRM  | Bacteria | alaS HMPREF9321_1395   | Veillonella atypica ACS-049-V-Sch6                                   | 872 |
| 1770 | E1LC31  | E1LC31_9FIRM  | Bacteria | alaS HMPREF9684_0520   | Veillonella atypica ACS-134-V-Col7a                                  | 872 |
| 1771 | E1LGP8  | E1LGP8_STRMT  | Bacteria | alaS SMSK321_0808      | Streptococcus mitis SK321                                            | 872 |
| 1772 | E1LKF5  | E1LKF5_STRMT  | Bacteria | alaS SMSK564_0332      | Streptococcus mitis SK564                                            | 872 |
| 1773 | E1LSV6  | E1LSV6_STRMT  | Bacteria | alaS SMSK597_1065      | Streptococcus mitis SK597                                            | 872 |
| 1774 | E1M0I1  | E1M0I1_STRMT  | Bacteria | alaS SM12261_0137      | Streptococcus mitis NCTC 12261                                       | 872 |
| 1775 | E1MAX4  | E1MAX4_9STRE  | Bacteria | alaS SIN_2092          | Streptococcus infantis SK1302                                        | 730 |
| 1776 | E1MDX4  | E1MDX4_9ACTO  | Bacteria | alaS HMPREF9278_1561   | Mobiluncus mulieris FB024-16                                         | 894 |
| 1777 | E1MSU8  | E1MSU8_9GAMM  | Bacteria | MettuDRAFT_3766        | Methylobacter tundripaludum SV96                                     | 870 |
| 1778 | E1N962  | E1N962_9BIFI  | Bacteria | alaS HMPREF9003_0475   | Bifidobacterium dentium JCVIHMP022                                   | 892 |
| 1779 | E1NFL0  | E1NFL0_9LACO  | Bacteria | alaS HMPREF9214_0023   | Lactobacillus iners LactinV 11V1-d                                   | 877 |
| 1780 | E1NKD7  | E1NKD7_9LACO  | Bacteria | alaS HMPREF9213_0618   | Lactobacillus iners LactinV 09V1-c                                   | 877 |
| 1781 | E1NMC2  | E1NMC2_9LACO  | Bacteria | alaS HMPREF9212_1331   | Lactobacillus iners LactinV 03V1-b                                   | 877 |
| 1782 | E1NR63  | E1NR63_9LACO  | Bacteria | alaS_1_HMPREF9211_0423 | Lactobacillus iners LactinV 01V1-a                                   | 632 |
| 1783 | E1NXE0  | E1NXE0_9LACO  | Bacteria | alaS HMPREF9215_0119   | Lactobacillus iners SPIN 2503V10-D                                   | 877 |
| 1784 | E1P4C4  | E1P4C4_NEILA  | Bacteria | NLY_30680              | Neisseria lactamica Y92-1009                                         | 874 |
| 1785 | E1P8P4  | E1P8P4_ECOAB  | Bacteria | alaS ECABU_c29670      | Escherichia coli OR:K5:H- (strain ABU 83972)                         | 876 |
| 1786 | E1QIT5  | E1QIT5_DESB2  | Bacteria | Deba_1140              | Desulfarculus baarsii (strain ATCC 33931 / DSM 2075 / VKM B-180;     | 884 |
| 1787 | E1QVT4  | E1QVT4_OLSUV  | Bacteria | Olsu_1127              | Olsenella uli (strain ATCC 49627 / DSM 7084 / CIP 109912 / JCM 1;    | 880 |
| 1788 | E1R5B6  | E1R5B6_SPISS  | Bacteria | Spirs_3146             | Spirochaeta smaragdinae (strain DSM 11293 / JCM 15392 / SEBR 4       | 597 |
| 1789 | E1RP27  | E1RP27_XYLF6  | Bacteria | alaS XFLM_05745        | Xylella fastidiosa (strain GB514)                                    | 884 |
| 1790 | E1S200  | E1S200_ECOUM  | Bacteria | alaS UM146_03110       | Escherichia coli (strain UM146)                                      | 876 |
| 1791 | E1SBX6  | E1SBX6_PANVC  | Bacteria | alaS Pvag_2402         | Pantoea vagans (strain C9-1) (Pantoea agglomerans (strain C9-1))     | 875 |
| 1792 | E1ST10  | E1ST10_FERBD  | Bacteria | Fbal_0857              | Ferrimonas balearica (strain DSM 9799 / CCM 4581 / PAT)              | 876 |
| 1793 | E1T2U6  | E1T2U6_THESX  | Bacteria | Thet_1414              | Thermoanaerobacter sp. (strain X513)                                 | 877 |
| 1794 | E1T4F5  | E1T4F5_BURSG  | Bacteria | BC1003_2438            | Burkholderia sp. (strain CCGE1003)                                   | 890 |
| 1795 | E1TLR1  | E1TLR1_LACPS  | Bacteria | alaS LPST_C1888        | Lactobacillus plantarum (strain ST-III)                              | 880 |
| 1796 | E1UGL2  | E1UGL2_LISML  | Bacteria | alaS lmo4a_1560        | Listeria monocytogenes serotype 4c (strain L99)                      | 879 |
| 1797 | E1ULW9  | E1ULW9_BACAS  | Bacteria | alaS BAMF_2549         | Bacillus amyloliquefaciens (strain ATCC 23350 / DSM 7 / NBRC 155     | 878 |
| 1798 | E1V8H1  | E1V8H1_HALED  | Bacteria | alaS HELO_3743         | Halomonas elongata (strain ATCC 33173 / DSM 2581 / NBRC 15536        | 868 |
| 1799 | E1VIQ9  | E1VIQ9_9GAMM  | Bacteria | alaS HDN1F_11180       | Gamma proteobacterium HdN1                                           | 876 |
| 1800 | E1VWE1  | E1VWE1_ARTAR  | Bacteria | alaS AARI_17300        | Arthrobacter arilaitensis (strain DSM 16368 / CIP 108037 / JCM 13;   | 896 |
| 1801 | E1W445  | E1W445_HAEP3  | Bacteria | PARA_10310             | Haemophilus parainfluenzae (strain T3T1)                             | 874 |
| 1802 | E1WA72  | E1WA72_SALTS  | Bacteria | alaS SL1344_2807       | Salmonella typhimurium (strain SL1344)                               | 876 |
| 1803 | E1WLF2  | E1WLF2_BACF6  | Bacteria | alaS BF638R_0731       | Bacteroides fragilis (strain 638R)                                   | 872 |
| 1804 | E1XBB8  | E1XBB8_HAEI1  | Bacteria | HIB_09470              | Haemophilus influenzae (strain 10810)                                | 874 |

|      |        |               |          |                       |                                                                   |     |
|------|--------|---------------|----------|-----------------------|-------------------------------------------------------------------|-----|
| 1805 | E1XH17 | E1XH17 STRZO  | Bacteria | alaS SPNOXC 12160     | Streptococcus pneumoniae serotype 3 (strain OXC141)               | 872 |
| 1806 | E1XKH4 | E1XKH4 STRZN  | Bacteria | alaS SPNINV200 12280  | Streptococcus pneumoniae serotype 14 (strain INV200)              | 872 |
| 1807 | E1XRW1 | E1XRW1 STRZI  | Bacteria | alaS INV104 11780     | Streptococcus pneumoniae serotype 1 (strain INV104)               | 872 |
| 1808 | E1XWP0 | E1XWP0 LEGPN  | Bacteria | LPW 18301             | Legionella pneumophila 130b                                       | 860 |
| 1809 | E1YM14 | E1YM14 9DELTA | Bacteria | N47_E46590            | Uncultured Desulfobacterium sp.                                   | 875 |
| 1810 | E1YXB9 | E1YXB9 9BACE  | Bacteria | HMPREF9008_01879      | Bacteroides sp. 20_3                                              | 873 |
| 1811 | E2CMI3 | E2CMI3 9RHOB  | Bacteria | alaS TRICHSKD4 4330   | Roseibium sp. TrichSKD4                                           | 888 |
| 1812 | E2JMV0 | E2JMV0 BORAF  | Bacteria | BafACA1_0224          | Borrelia afzelii ACA-1                                            | 594 |
| 1813 | E2JNZ4 | E2JNZ4 BORBU  | Bacteria | Bbu156a_0657          | Borrelia burgdorferi 156a                                         | 594 |
| 1814 | E2JTQ8 | E2JTQ8 ECO57  | Bacteria | alaS ECH7EC4206_A2138 | Escherichia coli O157:H7 str. EC4206                              | 876 |
| 1815 | E2K7V1 | E2K7V1 ECO57  | Bacteria | alaS ECH7EC4045_A2255 | Escherichia coli O157:H7 str. EC4045                              | 876 |
| 1816 | E2KSJ2 | E2KSJ2 ECO57  | Bacteria | alaS ECH74042_A2819   | Escherichia coli O157:H7 str. EC4042                              | 876 |
| 1817 | E2L368 | E2L368 BORBU  | Bacteria | BBUCA112A_0230        | Borrelia burgdorferi CA-11.2A                                     | 594 |
| 1818 | E2MNS0 | E2MNS0 FRANO  | Bacteria | alaS FTG 1460         | Francisella novicida FTG                                          | 865 |
| 1819 | E2MY63 | E2MY63_9CORY  | Bacteria | alaS CORAM0001_2137   | Corynebacterium amycolatum SK46                                   | 886 |
| 1820 | E2N559 | E2N559 CAPSP  | Bacteria | alaS CAPSP0001_0255   | Capnocytophaga sputigena ATCC 33612                               | 877 |
| 1821 | E2NF82 | E2NF82_9BACE  | Bacteria | BACCELL 02953         | Bacteroides cellulosilyticus DSM 14838                            | 872 |
| 1822 | E2P0V3 | E2P0V3 PASHA  | Bacteria | COI_1474              | Mannheimia haemolytica serotype A2 str. OVINE                     | 875 |
| 1823 | E2P765 | E2P765 PASHA  | Bacteria | COK_0997              | Mannheimia haemolytica serotype A2 str. BOVINE                    | 875 |
| 1824 | E2PDG7 | E2PDG7 NEIPO  | Bacteria | NEIPOLOT_00642        | Neisseria polysaccharea ATCC 43768                                | 873 |
| 1825 | E2PJE2 | E2PJE2 9RHIZ  | Bacteria | alaS BIBO2_0135       | Brucella sp. BO2                                                  | 885 |
| 1826 | E2PV60 | E2PV60 STRCL  | Bacteria | sya SCLAV_0731        | Streptomyces clavuligerus ATCC 27064                              | 889 |
| 1827 | E2QQE5 | E2QQE5 ECOLX  | Bacteria | alaS LF82_0058        | Escherichia coli                                                  | 876 |
| 1828 | E2S1A0 | E2S1A0_9CORY  | Bacteria | alaS HMPREF0305_10302 | Corynebacterium pseudogenitalium ATCC 33035                       | 897 |
| 1829 | E2S9F4 | E2S9F4_9ACTO  | Bacteria | alaS HMPREF0063_10594 | Aeromicrobium marinum DSM 15272                                   | 886 |
| 1830 | E2SIM1 | E2SIM1_9FIRM  | Bacteria | HMPREF0983_00860      | Erysipelotrichaceae bacterium 3_1_53                              | 875 |
| 1831 | E2SYT1 | E2SYT1_9RALS  | Bacteria | HMPREF1004_02281      | Ralstonia sp. 5_7_47FAA                                           | 880 |
| 1832 | E2TBU0 | E2TBU0_MYCTU  | Bacteria | TMBG_01095            | Mycobacterium tuberculosis SUMu002                                | 904 |
| 1833 | E2TPA1 | E2TPA1_MYCTU  | Bacteria | TMCG_01800            | Mycobacterium tuberculosis SUMu003                                | 904 |
| 1834 | E2U1F6 | E2U1F6_MYCTU  | Bacteria | TMDG_00269            | Mycobacterium tuberculosis SUMu004                                | 904 |
| 1835 | E2UC56 | E2UC56_MYCTU  | Bacteria | TMEG_03231            | Mycobacterium tuberculosis SUMu005                                | 904 |
| 1836 | E2UNR2 | E2UNR2_MYCTU  | Bacteria | TMFG_03783            | Mycobacterium tuberculosis SUMu006                                | 904 |
| 1837 | E2UXQ2 | E2UXQ2_MYCTU  | Bacteria | TMGG_02318            | Mycobacterium tuberculosis SUMu007                                | 904 |
| 1838 | E2VB72 | E2VB72_MYCTU  | Bacteria | TMHG_01749            | Mycobacterium tuberculosis SUMu008                                | 904 |
| 1839 | E2VNM0 | E2VNM0_MYCTU  | Bacteria | TMIG_03342            | Mycobacterium tuberculosis SUMu009                                | 904 |
| 1840 | E2VWV1 | E2VWV1_MYCTU  | Bacteria | TMJG_01535            | Mycobacterium tuberculosis SUMu010                                | 904 |
| 1841 | E2W818 | E2W818_MYCTU  | Bacteria | TMKG_02984            | Mycobacterium tuberculosis SUMu011                                | 904 |
| 1842 | E2WK43 | E2WK43_MYCTU  | Bacteria | TMLG_02283            | Mycobacterium tuberculosis SUMu012                                | 904 |
| 1843 | E2WXR4 | E2WXR4 ECOLX  | Bacteria | alaS EC182770_3642    | Escherichia coli 1827-70                                          | 784 |
| 1844 | E2X9Z6 | E2X9Z6_SHIDY  | Bacteria | alaS SD1617_2710      | Shigella dysenteriae 1617                                         | 784 |
| 1845 | E2XWW0 | E2XWW0_PSEFL  | Bacteria | alaS PFWH6_4527       | Pseudomonas fluorescens WH6                                       | 872 |
| 1846 | E2Y516 | E2Y516_ENTFA  | Bacteria | HMPREF9504_01506      | Enterococcus faecalis TX0102                                      | 880 |
| 1847 | E2YBV2 | E2YBV2_ENTFA  | Bacteria | HMPREF9493_01043      | Enterococcus faecalis DAPTO 516                                   | 880 |
| 1848 | E2YM61 | E2YM61_ENTFA  | Bacteria | HMPREF9492_01673      | Enterococcus faecalis DAPTO 512                                   | 880 |
| 1849 | E2YWZ7 | E2YWZ7_ENTFA  | Bacteria | HMPREF9512_01877      | Enterococcus faecalis TX0635                                      | 880 |
| 1850 | E2Z513 | E2Z513_ENTFA  | Bacteria | HMPREF9510_01443      | Enterococcus faecalis TX0470                                      | 880 |
| 1851 | E2ZDR1 | E2ZDR1_9FIRM  | Bacteria | HMPREF9429_01566      | Megasphaera micronuciformis F0359                                 | 868 |
| 1852 | E2ZN90 | E2ZN90_9FIRM  | Bacteria | HMPREF9436_03168      | Faecalibacterium cf. prausnitzii KLE1255                          | 887 |
| 1853 | E2ZPR7 | E2ZPR7_PSEAE  | Bacteria | PA39016_000110083     | Pseudomonas aeruginosa 39016                                      | 874 |
| 1854 | E3AR34 | E3AR34_9SPHI  | Bacteria | MucpaDRAFT_0254       | Mucilaginibacter paludis DSM 18603                                | 927 |
| 1855 | E3B776 | E3B776_9MICO  | Bacteria | alaS HMPREF0321_1422  | Dermaococcus sp. Ellin185                                         | 904 |
| 1856 | E3BNX4 | E3BNX4_9VIBR  | Bacteria | alaS VIBC2010_15742   | Vibrio caribbenticus ATCC BAA-2122                                | 860 |
| 1857 | E3BSQ0 | E3BSQ0_9LACO  | Bacteria | alaS HMPREF9216_0525  | Lactobacillus iners LEAF 2053A-b                                  | 877 |
| 1858 | E3BVW9 | E3BVW9_9LACO  | Bacteria | alaS HMPREF9217_1285  | Lactobacillus iners LEAF 2052A-d                                  | 877 |
| 1859 | E3C0Q2 | E3C0Q2_9LACO  | Bacteria | alaS HMPREF9218_1316  | Lactobacillus iners LEAF 2062A-h1                                 | 877 |
| 1860 | E3C1R4 | E3C1R4_9LACO  | Bacteria | alaS HMPREF9219_1141  | Lactobacillus iners LEAF 3008A-a                                  | 877 |
| 1861 | E3CAC1 | E3CAC1_9LACO  | Bacteria | alaS HMPREF9265_0911  | Lactobacillus oris PB013-T2-3                                     | 886 |
| 1862 | E3CCF7 | E3CCF7_STRPA  | Bacteria | alaS HMPREF9626_1355  | Streptococcus parasanguinis F0405                                 | 872 |
| 1863 | E3CHH0 | E3CHH0_STRDO  | Bacteria | alaS HMPREF9176_2051  | Streptococcus downei F0415                                        | 873 |
| 1864 | E3CT85 | E3CT85_STRVE  | Bacteria | alaS HMPREF9192_0367  | Streptococcus vestibularis F0396                                  | 872 |
| 1865 | E3CZ79 | E3CZ79_9BACT  | Bacteria | Apau_1329             | Aminomonas paucivorans DSM 12260                                  | 880 |
| 1866 | E3D1E9 | E3D1E9_NEIM7  | Bacteria | NMBB_1826             | Neisseria meningitidis serogroup B (strain alpha710)              | 885 |
| 1867 | E3DAT1 | E3DAT1_GARV3  | Bacteria | alaS HMPREF0421_21093 | Gardnerella vaginalis (strain ATCC 14019 / 317)                   | 894 |
| 1868 | E3DHN5 | E3DHN5_ERWSE  | Bacteria | alaS EJP617_19410     | Erwinia sp. (strain Ejp617)                                       | 876 |
| 1869 | E3DR74 | E3DR74_HALPG  | Bacteria | Hprae_0826            | Halanaerobium praevalens (strain ATCC 33744 / DSM 2228 / GSL)     | 877 |
| 1870 | E3DZY5 | E3DZY5_BACA1  | Bacteria | alaS BATR1942_11420   | Bacillus atrophaeus (strain 1942)                                 | 878 |
| 1871 | E3E6G3 | E3E6G3_PAEPS  | Bacteria | PPSC2_c4082           | Paenibacillus polymyxa (strain SC2) (Bacillus polymyxa)           | 877 |
| 1872 | E3EM30 | E3EM30_BIFBS  | Bacteria | alaS BBIF_0832        | Bifidobacterium bifidum (strain S17)                              | 892 |
| 1873 | E3F2D5 | E3F2D5_KETVY  | Bacteria | alaS EIO_1475         | Ketogulonicigenium vulgare (strain Y25)                           | 868 |
| 1874 | E3FBG4 | E3FBG4_CORP9  | Bacteria | alaS Cpl119_1153      | Corynebacterium pseudotuberculosis (strain I19)                   | 905 |
| 1875 | E3G6H9 | E3G6H9_ENTCS  | Bacteria | Entcl_1030            | Enterobacter cloacae (strain SCF1)                                | 875 |
| 1876 | E3GG93 | E3GG93_EUBLK  | Bacteria | ELI_3742              | Eubacterium limosum (strain KIST612)                              | 879 |
| 1877 | E3GSF2 | E3GSF2_HAEI2  | Bacteria | alaS R2846_1513       | Haemophilus influenzae (strain R2846 / 12)                        | 874 |
| 1878 | E3H2V8 | E3H2V8_ROTDC  | Bacteria | alaS HMPREF0733_12004 | Rothia dentocariosa (strain ATCC 17931 / CDC X599 / XDIA)         | 893 |
| 1879 | E3HB00 | E3HB00_ILYPC  | Bacteria | Ilyop_0361            | Ilyobacter polytropus (strain DSM 2926 / CuHBu1)                  | 868 |
| 1880 | E3HIR6 | E3HIR6_ACHXA  | Bacteria | alaS AXYL_02163       | Achromobacter xylosoxidans (strain A8)                            | 874 |
| 1881 | E3IOA9 | E3IOA9_RHOVT  | Bacteria | Rvan_3023             | Rhodomicrobium vannielii (strain ATCC 17100 / ATH 3.1.1 / DSM 11) | 894 |

|      |        |              |          |                      |                                                                   |     |
|------|--------|--------------|----------|----------------------|-------------------------------------------------------------------|-----|
| 1882 | E3IGH0 | E3IGH0 GEOS0 | Bacteria | GY4MC1_1011          | Geobacillus sp. (strain Y4.1MC1)                                  | 877 |
| 1883 | E3IK70 | E3IK70 DESVR | Bacteria | Deval_1006           | Desulfovibrio vulgaris (strain RCH1)                              | 879 |
| 1884 | E3J8Y8 | E3J8Y8 FRASU | Bacteria | FraEu11c_1664        | Frankia sp. (strain Eu11c)                                        | 883 |
| 1885 | E3JEQ8 | E3JEQ8 BUCA0 | Bacteria | alaS CWO_02130       | Buchnera aphidicola subsp. Acyrthosiphon pisum (strain LL01)      | 878 |
| 1886 | E3JGN6 | E3JGN6 BUCA3 | Bacteria | alaS CWQ_02175       | Buchnera aphidicola subsp. Acyrthosiphon pisum (strain TLW03)     | 878 |
| 1887 | E3J157 | E3J157 BUCAF | Bacteria | alaS CWS_02125       | Buchnera aphidicola subsp. Acyrthosiphon pisum (strain JF99)      | 878 |
| 1888 | E3JIX6 | E3JIX6 BUCAJ | Bacteria | alaS CWU_02620       | Buchnera aphidicola subsp. Acyrthosiphon pisum (strain JF98)      | 878 |
| 1889 | E3PH61 | E3PH61 FCOH1 | Bacteria | ETEC_2888            | Escherichia coli O78:H11 (strain H10407 / ETEC)                   | 876 |
| 1890 | E3PRV7 | E3PRV7 CLOSD | Bacteria | alaS CLOST_1491      | Clostridium sticklandii (strain ATCC 12662 / DSM 519 / JCM 1433 / | 882 |
| 1891 | E3R4K0 | E3R4K0_9LACO | Bacteria | LBKG_01278           | Lactobacillus crispatus CTV-05                                    | 879 |
| 1892 | E3RBS7 | E3RBS7_9LACO | Bacteria | LBGG_00877           | Lactobacillus gasseri MV-22                                       | 882 |
| 1893 | E3XKA7 | E3XKA7_ECOLX | Bacteria | alaS EC236275_1420   | Escherichia coli 2362-75                                          | 784 |
| 1894 | E3Y5L1 | E3Y5L1_SHIFL | Bacteria | alaS SF2457T_3349    | Shigella flexneri 2a str. 2457T                                   | 784 |
| 1895 | E3YGF7 | E3YGF7_LISMO | Bacteria | NT04LM_2287          | Listeria monocytogenes FSL F2-208                                 | 879 |
| 1896 | E3YQF1 | E3YQF1_9LIST | Bacteria | NT05LM_1773          | Listeria marthii FSL S4-120                                       | 864 |
| 1897 | E3Z7S8 | E3Z7S8_LISIN | Bacteria | NT06LI_1685          | Listeria innocua FSL J1-023                                       | 879 |
| 1898 | E3ZGP1 | E3ZGP1_LISTV | Bacteria | NT05LI_1855          | Listeria ivanovii FSL F6-596                                      | 879 |
| 1899 | E3ZZK4 | E3ZZK4_LISSE | Bacteria | NT04LS_1743          | Listeria seeligeri FSL S4-171                                     | 879 |
| 1900 | E4A968 | E4A968_PROAC | Bacteria | HMPREF9573_02063     | Propionibacterium acnes HL072PA2                                  | 892 |
| 1901 | E4ABK6 | E4ABK6_PROAC | Bacteria | HMPREF9622_00333     | Propionibacterium acnes HL037PA3                                  | 892 |
| 1902 | E4AP01 | E4AP01_PROAC | Bacteria | HMPREF9613_01764     | Propionibacterium acnes HL002PA1                                  | 892 |
| 1903 | E4AV17 | E4AV17_PROAC | Bacteria | HMPREF9609_01391     | Propionibacterium acnes HL027PA1                                  | 892 |
| 1904 | E4B4J0 | E4B4J0_PROAC | Bacteria | HMPREF9606_02080     | Propionibacterium acnes HL036PA3                                  | 892 |
| 1905 | E4BB98 | E4BB98_PROAC | Bacteria | HMPREF9577_01891     | Propionibacterium acnes HL110PA3                                  | 428 |
| 1906 | E4BDM0 | E4BDM0_PROAC | Bacteria | HMPREF9621_00313     | Propionibacterium acnes HL037PA2                                  | 892 |
| 1907 | E4BQM6 | E4BQM6_PROAC | Bacteria | HMPREF9617_01434     | Propionibacterium acnes HL056PA1                                  | 892 |
| 1908 | E4C014 | E4C014_PROAC | Bacteria | HMPREF9616_02213     | Propionibacterium acnes HL007PA1                                  | 892 |
| 1909 | E4C6F5 | E4C6F5_PROAC | Bacteria | HMPREF9611_02089     | Propionibacterium acnes HL063PA1                                  | 892 |
| 1910 | E4CDU4 | E4CDU4_PROAC | Bacteria | HMPREF9604_02105     | Propionibacterium acnes HL036PA1                                  | 892 |
| 1911 | E4CKY1 | E4CKY1_PROAC | Bacteria | HMPREF9591_01991     | Propionibacterium acnes HL086PA1                                  | 892 |
| 1912 | E4CST2 | E4CST2_PROAC | Bacteria | HMPREF9587_01599     | Propionibacterium acnes HL025PA1                                  | 892 |
| 1913 | E4D1V1 | E4D1V1_PROAC | Bacteria | HMPREF9612_02381     | Propionibacterium acnes HL063PA2                                  | 892 |
| 1914 | E4D7P5 | E4D7P5_PROAC | Bacteria | HMPREF9605_01817     | Propionibacterium acnes HL036PA2                                  | 892 |
| 1915 | E4DDN9 | E4DDN9_PROAC | Bacteria | HMPREF9593_01395     | Propionibacterium acnes HL046PA2                                  | 892 |
| 1916 | E4DJY4 | E4DJY4_PROAC | Bacteria | HMPREF9589_00986     | Propionibacterium acnes HL059PA1                                  | 892 |
| 1917 | E4DSR0 | E4DSR0_PROAC | Bacteria | HMPREF9580_01502     | Propionibacterium acnes HL087PA2                                  | 892 |
| 1918 | E4E1S0 | E4E1S0_PROAC | Bacteria | HMPREF9576_01859     | Propionibacterium acnes HL110PA2                                  | 892 |
| 1919 | E4E8E2 | E4E8E2_PROAC | Bacteria | HMPREF9574_01615     | Propionibacterium acnes HL074PA1                                  | 892 |
| 1920 | E4EGL8 | E4EGL8_PROAC | Bacteria | HMPREF9566_02218     | Propionibacterium acnes HL045PA1                                  | 892 |
| 1921 | E4EQG7 | E4EQG7_PROAC | Bacteria | HMPREF9585_02337     | Propionibacterium acnes HL083PA1                                  | 892 |
| 1922 | E4EXC6 | E4EXC6_PROAC | Bacteria | HMPREF9564_02222     | Propionibacterium acnes HL053PA1                                  | 892 |
| 1923 | E4F3U1 | E4F3U1_PROAC | Bacteria | HMPREF9575_01972     | Propionibacterium acnes HL110PA1                                  | 892 |
| 1924 | E4F9S0 | E4F9S0_PROAC | Bacteria | HMPREF9567_01145     | Propionibacterium acnes HL013PA1                                  | 892 |
| 1925 | E4FK09 | E4FK09_PROAC | Bacteria | HMPREF9620_02328     | Propionibacterium acnes HL037PA1                                  | 892 |
| 1926 | E4FRY7 | E4FRY7_PROAC | Bacteria | HMPREF9618_01968     | Propionibacterium acnes HL082PA1                                  | 892 |
| 1927 | E4FY44 | E4FY44_PROAC | Bacteria | HMPREF9600_02070     | Propionibacterium acnes HL050PA3                                  | 892 |
| 1928 | E4G434 | E4G434_PROAC | Bacteria | HMPREF9598_01414     | Propionibacterium acnes HL050PA1                                  | 892 |
| 1929 | E4GAU9 | E4GAU9_PROAC | Bacteria | HMPREF9596_01042     | Propionibacterium acnes HL005PA3                                  | 892 |
| 1930 | E4GFY4 | E4GFY4_PROAC | Bacteria | HMPREF9595_00431     | Propionibacterium acnes HL005PA2                                  | 892 |
| 1931 | E4GSR5 | E4GSR5_PROAC | Bacteria | HMPREF9594_02007     | Propionibacterium acnes HL005PA1                                  | 892 |
| 1932 | E4GX54 | E4GX54_PROAC | Bacteria | HMPREF9619_00563     | Propionibacterium acnes HL082PA2                                  | 892 |
| 1933 | E4H796 | E4H796_PROAC | Bacteria | HMPREF9614_01922     | Propionibacterium acnes HL002PA2                                  | 892 |
| 1934 | E4HBS4 | E4HBS4_PROAC | Bacteria | HMPREF9608_00931     | Propionibacterium acnes HL067PA1                                  | 892 |
| 1935 | E4HNY2 | E4HNY2_PROAC | Bacteria | HMPREF9607_02486     | Propionibacterium acnes HL044PA1                                  | 892 |
| 1936 | E4HSU3 | E4HSU3_PROAC | Bacteria | HMPREF9603_01121     | Propionibacterium acnes HL001PA1                                  | 892 |
| 1937 | E4I117 | E4I117_PROAC | Bacteria | HMPREF9597_01270     | Propionibacterium acnes HL005PA4                                  | 892 |
| 1938 | E4IB07 | E4IB07_ENTFC | Bacteria | HMPREF9525_02348     | Enterococcus faecium TX0133a04                                    | 880 |
| 1939 | E4IFQ5 | E4IFQ5_ENTFC | Bacteria | HMPREF9527_00880     | Enterococcus faecium TX0133C                                      | 880 |
| 1940 | E4IPE3 | E4IPE3_ENTFC | Bacteria | HMPREF9522_00847     | Enterococcus faecium TX0082                                       | 880 |
| 1941 | E4J009 | E4J009_ENTFC | Bacteria | HMPREF9523_01741     | Enterococcus faecium TX0133A                                      | 880 |
| 1942 | E4J5X6 | E4J5X6_ENTFC | Bacteria | HMPREF9526_00676     | Enterococcus faecium TX0133B                                      | 880 |
| 1943 | E4JFG3 | E4JFG3_ENTFC | Bacteria | HMPREF9524_00909     | Enterococcus faecium TX0133a01                                    | 880 |
| 1944 | E4K390 | E4K390_9FIRM | Bacteria | CallaDRAFT_0178      | Caldicellulosiruptor lactoaceticus 6A                             | 883 |
| 1945 | E4KIG0 | E4KIG0_9SPHI | Bacteria | PedsaDRAFT_2697      | Pedobacter saltans DSM 12145                                      | 880 |
| 1946 | E4KP16 | E4KP16_9LACT | Bacteria | alaS HMPREF9257_1299 | Eremococcus coleocola ACS-139-V-Col8                              | 883 |
| 1947 | E4KVP1 | E4KVP1_9PORP | Bacteria | alaS HMPREF9294_1209 | Porphyromonas asaccharolytica PR426713P-I                         | 871 |
| 1948 | E4KXY9 | E4KXY9_9FIRM | Bacteria | alaS HMPREF9286_1396 | Peptoniphilus harei ACS-146-V-Sch2b                               | 870 |
| 1949 | E4L5G0 | E4L5G0_9STRE | Bacteria | alaS HMPREF9320_0437 | Streptococcus pseudoporcinus SPIN 20026                           | 873 |
| 1950 | E4L865 | E4L865_9FIRM | Bacteria | alaS HMPREF9220_1047 | Dialister microaerophilus UPII 345-E                              | 869 |
| 1951 | E4LBR2 | E4LBR2_9FIRM | Bacteria | alaS HMPREF9199_1221 | Veillonella sp. oral taxon 158 str. F0412                         | 871 |
| 1952 | E4LJ35 | E4LJ35_9FIRM | Bacteria | alaS HMPREF9162_1563 | Selenomonas sp. oral taxon 137 str. F0430                         | 875 |
| 1953 | E4LNX2 | E4LNX2_9CLOT | Bacteria | alaS HMPREF9406_1854 | Clostridium sp. HGF2                                              | 875 |
| 1954 | E4M306 | E4M306_9FIRM | Bacteria | ThesuDRAFT_1358      | Thermoerobacter subterraneus DSM 13965                            | 905 |
| 1955 | E4MDR4 | E4MDR4_9BACT | Bacteria | alaS HMPREF9720_1084 | Alistipes sp. HGB5                                                | 873 |
| 1956 | E4MG37 | E4MG37_9FIRM | Bacteria | EubceDRAFT_0137      | Eubacterium cellulosolvens 6                                      | 897 |
| 1957 | E4MRE4 | E4MRE4_CAPOC | Bacteria | alaS HMPREF1977_1008 | Capnocytophaga ochracea F0287                                     | 877 |
| 1958 | E4N7R9 | E4N7R9_KITSK | Bacteria | alaS KSE_14220       | Kitasatospora setae (strain ATCC 33774 / DSM 43861 / JCM 3304 /   | 888 |



|      |         |               |          |                       |                                                                     |     |
|------|---------|---------------|----------|-----------------------|---------------------------------------------------------------------|-----|
| 1959 | E4P1B4  | E4P1B4 BIFBP  | Bacteria | alaS BBPR_0801        | Bifidobacterium bifidum (strain PRL2010)                            | 892 |
| 1960 | E4P4G4  | E4P4G4 ECO8N  | Bacteria | alaS NRG857_13190     | Escherichia coli O83:H1 (strain NRG 857C / AIEC)                    | 876 |
| 1961 | E4PIK8  | E4PIK8 MARAH  | Bacteria | HP15_1319             | Marinobacter adhaerens (strain HP15)                                | 876 |
| 1962 | E4Q1F1  | E4Q1F1 CALOW  | Bacteria | Calow_1123            | Caldicellulosiruptor owensensis (strain ATCC 700167 / DSM 13100)    | 879 |
| 1963 | E4QAT4  | E4QAT4_CALH1  | Bacteria | Calhy_1395            | Caldicellulosiruptor hydrothermalis (strain DSM 18901 / VKM B-241)  | 881 |
| 1964 | E4QGU1  | E4QGU1 BORBN  | Bacteria | BbuN40_0220           | Borrelia burgdorferi (strain N40)                                   | 594 |
| 1965 | E4QL71  | E4QL71 METS6  | Bacteria | alaS MPQ_2141         | Methylovorus sp. (strain MP688)                                     | 874 |
| 1966 | E4QWT8  | E4QWT8_HAEI6  | Bacteria | alaS R2866_1579       | Haemophilus influenzae (strain R2866)                               | 874 |
| 1967 | E4R451  | E4R451 BIFLM  | Bacteria | alaS BBMN68_621       | Bifidobacterium longum subsp. longum (strain BBMN68)                | 893 |
| 1968 | E4RAY6  | E4RAY6_PSEPB  | Bacteria | alaS PPUBIRD1_1429    | Pseudomonas putida (strain BIRD-1)                                  | 874 |
| 1969 | E4RLH4  | E4RLH4 HALSL  | Bacteria | Halsa_1461            | Halanaerobium sp. (strain sapolanicus)                              | 877 |
| 1970 | E4RZ44  | E4RZ44_LEAB4  | Bacteria | Lbys_3514             | Leadbetterella byssohila (strain DSM 17132 / KACC 11308 / 4M15)     | 887 |
| 1971 | E4S149  | E4S149 BORBJ  | Bacteria | BbuJD1_0220           | Borrelia burgdorferi (strain JD1)                                   | 594 |
| 1972 | E4S7T4  | E4S7T4_CALKI  | Bacteria | Calkr_1318            | Caldicellulosiruptor kristjanssonii (strain ATCC 700853 / DSM 1213) | 883 |
| 1973 | E4SBV3  | E4SBV3_CALK2  | Bacteria | Calkro_1370           | Caldicellulosiruptor kronotskyensis (strain DSM 18902 / VKM B-241)  | 883 |
| 1974 | E4SLG6  | E4SLG6_LACAR  | Bacteria | alaS LA2_02165        | Lactobacillus amylovorus (strain GRL 1112)                          | 879 |
| 1975 | E4SSE6  | E4SSE6_STRTN  | Bacteria | STND_0455             | Streptococcus thermophilus (strain ND03)                            | 872 |
| 1976 | E4SW84  | E4SW84_LACDN  | Bacteria | alaS LDBND_1515       | Lactobacillus delbrueckii subsp. bulgaricus (strain ND02)           | 877 |
| 1977 | E4T7X4  | E4T7X4_PALPW  | Bacteria | Palpr_2688            | Paludibacter propionigenes (strain DSM 17365 / JCM 13257 / WB)      | 869 |
| 1978 | E4TD51  | E4TD51_RIEAD  | Bacteria | Riean_1553            | Riemerella anatipestifer (strain ATCC 11845 / DSM 15868 / JCM 95)   | 867 |
| 1979 | E4TGX8  | E4TGX8_CALNY  | Bacteria | Calni_0827            | Calditerrivibrio nitroreducens (strain DSM 19672 / NBRC 101217 / )  | 873 |
| 1980 | E4TSU6  | E4TSU6_MARTH  | Bacteria | Ftrac_2911            | Marivirga tractuosa (strain ATCC 23168 / DSM 4126 / NBRC 15989)     | 876 |
| 1981 | E4TWP2  | E4TWP2_SULKY  | Bacteria | Sulku_2228            | Sulfuricurvum kujjense (strain ATCC BAA-921 / DSM 16994 / JCM 1)    | 851 |
| 1982 | E4U9W3  | E4U9W3_OCEP5  | Bacteria | Ocepr_1825            | Oceanithermus profundus (strain DSM 14977 / NBRC 100410 / VKM)      | 895 |
| 1983 | E4UDT5  | E4UDT5_LIBSC  | Bacteria | CKC_05080             | Liberibacter solanacearum (strain Clso-ZC1)                         | 906 |
| 1984 | E4V9A4  | E4V9A4_BIFBI  | Bacteria | BBNG_00743            | Bifidobacterium bifidum NCIMB 41171                                 | 892 |
| 1985 | E4VTU5  | E4VTU5_BACFR  | Bacteria | BFAG_00101            | Bacteroides fragilis 3_1_12                                         | 872 |
| 1986 | E4WZ9   | E4WZ9_RHOE1   | Bacteria | alaS REQ_21510        | Rhodococcus equi (strain 103S) (Corynebacterium equi)               | 890 |
| 1987 | E4ZC47  | E4ZC47_NEILO  | Bacteria | alaS NLA_6900         | Neisseria lactamica (strain 020-06)                                 | 874 |
| 1988 | E5AIY8  | E5AIY8_CHLPS  | Bacteria | Cpsi_8581             | Chlamydomphila psittaci RD1                                         | 875 |
| 1989 | E5AP78  | E5AP78_BURRH  | Bacteria | RBRH_01067            | Burkholderia rhizoxinica (strain DSM 19002 / CIP 109453 / HKI 45)   | 893 |
| 1990 | E5B2F8  | E5B2F8_ERWAM  | Bacteria | alaS EAIL5_0840       | Erwinia amylovora ATCC BAA-2158                                     | 833 |
| 1991 | E5BHH0  | E5BHH0_9FUSO  | Bacteria | FSBG_01440            | Fusobacterium sp. 3_1_5R                                            | 866 |
| 1992 | E5BJR9  | E5BJR9_9FUSO  | Bacteria | FSEG_00349            | Fusobacterium sp. D12                                               | 866 |
| 1993 | E5BQM4  | E5BQM4_9FUSO  | Bacteria | FUAG_00312            | Fusobacterium ulcerans ATCC 49185                                   | 866 |
| 1994 | E5C1I1  | E5C1I1_9FUSO  | Bacteria | FGAG_00925            | Fusobacterium gonidiaformans ATCC 25563                             | 866 |
| 1995 | E5C6V0  | E5C6V0_9BACE  | Bacteria | BSGG_1565             | Bacteroides sp. D2                                                  | 872 |
| 1996 | E5CM53  | E5CM53_STAHO  | Bacteria | HMPREF0798_00179      | Staphylococcus hominis subsp. hominis C80                           | 876 |
| 1997 | E5CRW5  | E5CRW5_9STAP  | Bacteria | HMPREF0786_00693      | Staphylococcus caprae C87                                           | 876 |
| 1998 | E5QUJ7  | E5QUJ7_STAAH  | Bacteria | alaS HMPREF0772_11523 | Staphylococcus aureus (strain TCH60)                                | 877 |
| 1999 | E5R6Q2  | E5R6Q2_STAAG  | Bacteria | alaS ECTR2_1467       | Staphylococcus aureus (strain ECT-R 2)                              | 876 |
| 2000 | E5TAF2  | E5TAF2_STAUA  | Bacteria | CGSSa00_07625         | Staphylococcus aureus subsp. aureus CGS00                           | 876 |
| 2001 | E5TI12  | E5TI12_STAUA  | Bacteria | CGSSa01_09194         | Staphylococcus aureus subsp. aureus CGS01                           | 876 |
| 2002 | E5TVE2  | E5TVE2_STAUA  | Bacteria | CGSSa03_02408         | Staphylococcus aureus subsp. aureus CGS03                           | 876 |
| 2003 | E5UAA8  | E5UAA8_ALCXX  | Bacteria | HMPREF0005_01961      | Achromobacter xylosoxidans C54                                      | 874 |
| 2004 | E5UIB6  | E5UIB6_NEIMU  | Bacteria | HMPREF0604_00461      | Neisseria mucosa C102                                               | 964 |
| 2005 | E5V0C0  | E5V0C0_9BACE  | Bacteria | HMPREF9011_04395      | Bacteroides sp. 3_1_40A                                             | 871 |
| 2006 | E5V1B8  | E5V1B8_9BACL  | Bacteria | HMPREF0432_00164      | Gemella morbillum M424                                              | 863 |
| 2007 | E5VEX2  | E5VEX2_9BACE  | Bacteria | HMPREF1007_03308      | Bacteroides sp. 4_1_36                                              | 872 |
| 2008 | E5VHW1  | E5VHW1_9FIRM  | Bacteria | HMPREF0996_00661      | Lachnospiraceae bacterium 5_1_63FAA                                 | 765 |
| 2009 | E5VU08  | E5VU08_9FIRM  | Bacteria | HMPREF1011_01482      | Anaerostipes sp. 3_2_56FAA                                          | 879 |
| 2010 | E5VZM3  | E5VZM3_9BACI  | Bacteria | HMPREF1012_00076      | Bacillus sp. BT1B_CT2                                               | 878 |
| 2011 | E5WIIW5 | E5WIIW5_9BACI | Bacteria | HMPREF1013_02397      | Bacillus sp. 2_A_57_CT2                                             | 877 |
| 2012 | E5WXT2  | E5WXT2_9BACE  | Bacteria | HMPREF1016_01443      | Bacteroides eggerthii 1_2_48FAA                                     | 873 |
| 2013 | E5XBG1  | E5XBG1_9ACTN  | Bacteria | HMPREF1023_02402      | Eggerthella sp. 1_3_56FAA                                           | 878 |
| 2014 | E5XE67  | E5XE67_9FIRM  | Bacteria | HMPREF1026_00420      | Lachnospiraceae bacterium 8_1_57FAA                                 | 880 |
| 2015 | E5XP45  | E5XP45_9ACTO  | Bacteria | HMPREF9336_01266      | Segniliparus rugosus ATCC BAA-974                                   | 830 |
| 2016 | E5XXC7  | E5XXC7_9BIFI  | Bacteria | HMPREF0177_00630      | Bifidobacterium sp. 12_1_47BFAA                                     | 893 |
| 2017 | E5Y3I3  | E5Y3I3_BILWA  | Bacteria | HMPREF0179_00744      | Bilophila wadsworthia 3_1_6                                         | 884 |
| 2018 | E5YKU4  | E5YKU4_9ENTR  | Bacteria | HMPREF0864_03142      | Enterobacteriaceae bacterium 9_2_54FAA                              | 875 |
| 2019 | E5YUN5  | E5YUN5_9BACL  | Bacteria | PVOR_10139            | Paenibacillus vortex V453                                           | 875 |
| 2020 | E5ZNV1  | E5ZNV1_ECOLX  | Bacteria | HMPREF9539_00818      | Escherichia coli MS 110-3                                           | 784 |
| 2021 | E6A7B2  | E6A7B2_ECOLX  | Bacteria | HMPREF9544_01898      | Escherichia coli MS 153-1                                           | 784 |
| 2022 | E6ANR7  | E6ANR7_ECOLX  | Bacteria | HMPREF9545_02250      | Escherichia coli MS 16-3                                            | 784 |
| 2023 | E6BAN4  | E6BAN4_ECOLX  | Bacteria | alaS EC3431_4689      | Escherichia coli 3431                                               | 784 |
| 2024 | E6BMP5  | E6BMP5_ECOLX  | Bacteria | HMPREF9350_03669      | Escherichia coli MS 85-1                                            | 784 |
| 2025 | E6BZ51  | E6BZ51_PROAC  | Bacteria | HMPREF9590_00907      | Propionibacterium acnes HL059PA2                                    | 892 |
| 2026 | E6C770  | E6C770_PROAC  | Bacteria | HMPREF9602_01768      | Propionibacterium acnes HL030PA2                                    | 892 |
| 2027 | E6CFJ0  | E6CFJ0_PROAC  | Bacteria | HMPREF9601_02232      | Propionibacterium acnes HL030PA1                                    | 892 |
| 2028 | E6CLK2  | E6CLK2_PROAC  | Bacteria | HMPREF9599_00842      | Propionibacterium acnes HL050PA2                                    | 892 |
| 2029 | E6CU86  | E6CU86_PROAC  | Bacteria | HMPREF9583_02023      | Propionibacterium acnes HL038PA1                                    | 892 |
| 2030 | E6D2T9  | E6D2T9_PROAC  | Bacteria | HMPREF9582_01294      | Propionibacterium acnes HL060PA1                                    | 892 |
| 2031 | E6D4W8  | E6D4W8_PROAC  | Bacteria | HMPREF9578_00125      | Propionibacterium acnes HL110PA4                                    | 892 |
| 2032 | E6DFQ6  | E6DFQ6_PROAC  | Bacteria | HMPREF9615_01787      | Propionibacterium acnes HL002PA3                                    | 892 |
| 2033 | E6DJX7  | E6DJX7_PROAC  | Bacteria | HMPREF9610_00431      | Propionibacterium acnes HL027PA2                                    | 892 |
| 2034 | E6DVB7  | E6DVB7_PROAC  | Bacteria | HMPREF9565_01751      | Propionibacterium acnes HL053PA2                                    | 892 |
| 2035 | E6E2E1  | E6E2E1_PROAC  | Bacteria | HMPREF9572_01305      | Propionibacterium acnes HL072PA1                                    | 892 |



|      |        |              |          |                         |                                                                     |     |
|------|--------|--------------|----------|-------------------------|---------------------------------------------------------------------|-----|
| 2036 | E6EA11 | E6EA11 PROAC | Bacteria | HMPREF9569_01767        | Propionibacterium acnes HL078PA1                                    | 892 |
| 2037 | E6EGT7 | E6EGT7 PROAC | Bacteria | HMPREF9592_02098        | Propionibacterium acnes HL046PA1                                    | 892 |
| 2038 | E6EN32 | E6EN32_ENTFA | Bacteria | HMPREF9496_01100        | Enterococcus faecalis TX4000                                        | 880 |
| 2039 | E6EX11 | E6EX11_ENTFA | Bacteria | HMPREF9511_01528        | Enterococcus faecalis TX0630                                        | 880 |
| 2040 | E6F6T3 | E6F6T3_ENTFA | Bacteria | HMPREF9502_01384        | Enterococcus faecalis TX0031                                        | 880 |
| 2041 | E6FEQ9 | E6FEQ9_ENTFA | Bacteria | HMPREF9497_01383        | Enterococcus faecalis TX4244                                        | 880 |
| 2042 | E6FKV9 | E6FKV9_ENTFA | Bacteria | HMPREF9519_00628        | Enterococcus faecalis TX1346                                        | 880 |
| 2043 | E6FYM6 | E6FYM6_ENTFA | Bacteria | HMPREF9518_02303        | Enterococcus faecalis TX1342                                        | 880 |
| 2044 | E6G6B8 | E6G6B8_ENTFA | Bacteria | HMPREF9516_02203        | Enterococcus faecalis TX1302                                        | 880 |
| 2045 | E6GCZ9 | E6GCZ9_ENTFA | Bacteria | HMPREF9503_01644        | Enterococcus faecalis TX0043                                        | 880 |
| 2046 | E6GGY4 | E6GGY4_ENTFA | Bacteria | HMPREF9501_00177        | Enterococcus faecalis TX0027                                        | 880 |
| 2047 | E6GZ80 | E6GZ80_ENTFA | Bacteria | HMPREF9506_03149        | Enterococcus faecalis TX0309A                                       | 880 |
| 2048 | E6H1M3 | E6H1M3_ENTFA | Bacteria | HMPREF9507_00736        | Enterococcus faecalis TX0309B                                       | 880 |
| 2049 | E6H931 | E6H931_ENTFA | Bacteria | HMPREF9500_00137        | Enterococcus faecalis TX0017                                        | 880 |
| 2050 | E6HJY1 | E6HJY1_ENTFA | Bacteria | HMPREF9494_00867        | Enterococcus faecalis TX2137                                        | 880 |
| 2051 | E6HWX1 | E6HWX1_ENTFA | Bacteria | HMPREF9508_02091        | Enterococcus faecalis TX0312                                        | 880 |
| 2052 | E6I238 | E6I238_ENTFA | Bacteria | HMPREF9499_01322        | Enterococcus faecalis TX0012                                        | 880 |
| 2053 | E6IFU3 | E6IFU3_ENTFA | Bacteria | HMPREF9513_03199        | Enterococcus faecalis TX0645                                        | 880 |
| 2054 | E6INQ2 | E6INQ2_ENTFA | Bacteria | HMPREF9517_02675        | Enterococcus faecalis TX1341                                        | 880 |
| 2055 | E6IRQ9 | E6IRQ9_ENTFA | Bacteria | HMPREF9495_00650        | Enterococcus faecalis TX2141                                        | 880 |
| 2056 | E6J012 | E6J012_STRAP | Bacteria | HMPREF0813_00582        | Streptococcus anginosus F0211                                       | 872 |
| 2057 | E6J4N3 | E6J4N3_9ACTO | Bacteria | alaS ES5_00802          | Dietzia cinnamea P4                                                 | 859 |
| 2058 | E6J142 | E6J142_RIFAN | Bacteria | alaS RAYM_05181         | Riemerella anatipestifer RA-YM                                      | 867 |
| 2059 | E6JMN3 | E6JMN3_STAEP | Bacteria | alaS GSEF_0918          | Staphylococcus epidermidis FRI909                                   | 876 |
| 2060 | E6JSM6 | E6JSM6_9SPTO | Bacteria | SpithDRAFT_0390         | Spirochaeta thermophila DSM 6578                                    | 603 |
| 2061 | E6K1S1 | E6K1S1_PARDN | Bacteria | alaS HMPREF0620_0757    | Parascardovia denticolens DSM 10105                                 | 903 |
| 2062 | E6K747 | E6K747_9BACT | Bacteria | alaS HMPREF6485_1433    | Prevotella buccae ATCC 33574                                        | 881 |
| 2063 | E6KN84 | E6KN84_STRSA | Bacteria | alaS HMPREF8578_1699    | Streptococcus sanguinis ATCC 49296                                  | 874 |
| 2064 | E6KQ13 | E6KQ13_9ACTO | Bacteria | ppx HMPREF9006_0144     | Actinomyces sp. oral taxon 180 str. F0310                           | 901 |
| 2065 | E6L035 | E6L035_9PAST | Bacteria | alaS HMPREF9064_1767    | Aggregatibacter segnis ATCC 33393                                   | 874 |
| 2066 | E6L455 | E6L455_9PROT | Bacteria | alaS HMPREF9401_1231    | Arcobacter butzleri JV22                                            | 851 |
| 2067 | E6LFZ7 | E6LFZ7_9ENTE | Bacteria | alaS HMPREF9088_1287    | Enterococcus italicus DSM 15952                                     | 880 |
| 2068 | E6LP14 | E6LP14_9FIRM | Bacteria | alaS HMPREF0381_1869    | Eubacterium saburreum DSM 3986                                      | 885 |
| 2069 | E6LSP2 | E6LSP2_9LACO | Bacteria | alaS HMPREF9223_0023    | Lactobacillus iners ATCC 55195                                      | 906 |
| 2070 | E6LZA7 | E6LZA7_9ACTO | Bacteria | alaS HMPREF0388_1194    | Mobiluncus curtisii ATCC 51333                                      | 895 |
| 2071 | E6M2R2 | E6M2R2_9ACTO | Bacteria | alaS HMPREF0576_0617    | Mobiluncus curtisii subsp. holmesii ATCC 35242                      | 895 |
| 2072 | E6M719 | E6M719_STALU | Bacteria | alaS HMPREF0790_0194    | Staphylococcus lugdunensis M23590                                   | 876 |
| 2073 | E6MG87 | E6MG87_9FIRM | Bacteria | alaS HMP0721_1020       | Pseudoramibacter alactolyticus ATCC 23263                           | 882 |
| 2074 | E6MSJ0 | E6MSJ0_9BACT | Bacteria | alaS HMPREF9420_2458    | Prevotella salivae DSM 15606                                        | 916 |
| 2075 | E6N037 | E6N037_NEIME | Bacteria | alaS NMH_2217           | Neisseria meningitidis H44/76                                       | 874 |
| 2076 | E6RLU7 | E6RLU7_PSEU9 | Bacteria | alaS PSM_A0579          | Pseudoalteromonas sp. (strain SM9913)                               | 866 |
| 2077 | E6S8W3 | E6S8W3_INTC7 | Bacteria | Intca_1587              | Intrasporangium calvum (strain ATCC 23552 / DSM 43043 / JCM 30      | 890 |
| 2078 | E6SLA5 | E6SLA5_THEM7 | Bacteria | Tmar_1223               | Thermaerobacter marianensis (strain ATCC 700841 / DSM 12885 /       | 905 |
| 2079 | E6STI0 | E6STI0_BACT6 | Bacteria | Bache_1244              | Bacteroides helcogenes (strain ATCC 35417 / DSM 20613 / JCM 62      | 872 |
| 2080 | E6T8S5 | E6T8S5_SHEB6 | Bacteria | Sbal678_3274            | Shewanella baltica (strain OS678)                                   | 874 |
| 2081 | E6TFC4 | E6TFC4_MYCSR | Bacteria | Mspyr1_31040            | Mycobacterium sp. (strain Spyr1)                                    | 898 |
| 2082 | E6TVA4 | E6TVA4_BACCJ | Bacteria | Bcell_1525              | Bacillus cellulolyticus (strain ATCC 21833 / DSM 2522 / FERM P-1    | 878 |
| 2083 | E6U3K9 | E6U3K9_ETHHY | Bacteria | Ethha_2092              | Ethanoligenens harbinense (strain DSM 18485 / JCM 12961 / CGMC      | 874 |
| 2084 | E6UAG2 | E6UAG2_RUMA7 | Bacteria | Rumal_1886              | Ruminococcus albus (strain ATCC 27210 / DSM 20455 / JCM 14654       | 885 |
| 2085 | E6UYF9 | E6UYF9_VARPD | Bacteria | Varpa_3599              | Variovorax paradoxus EPS                                            | 874 |
| 2086 | E6VIB4 | E6VIB4_RHOPX | Bacteria | RpdX1_1502              | Rhodopseudomonas palustris (strain DX-1)                            | 890 |
| 2087 | E6VWW9 | E6VWW9_DESAO | Bacteria | Daes_2735               | Desulfovibrio aespoensis (strain ATCC 700646 / DSM 10631 / Asp      | 879 |
| 2088 | E6W1T2 | E6W1T2_DESIS | Bacteria | Selin_0720              | Desulfurispirillum indicum (strain ATCC BAA-1389 / S5)              | 893 |
| 2089 | E6WG81 | E6WG81_PANSA | Bacteria | Pat9b_3062              | Pantoea sp. (strain At-9b)                                          | 875 |
| 2090 | E6WRS4 | E6WRS4_PSEU0 | Bacteria | Psesu_1023              | Pseudoxanthomonas suwonensis (strain 11-1)                          | 882 |
| 2091 | E6XET4 | E6XET4_CELAD | Bacteria | Celal_0802              | Cellulophaga algicola (strain DSM 14237 / IC166 / ACAM 630)         | 871 |
| 2092 | E6XID6 | E6XID6_SHEP2 | Bacteria | Sput200_2883            | Shewanella putrefaciens (strain 200)                                | 874 |
| 2093 | E6YIA1 | E6YIA1_BARCL | Bacteria | alaS BARCL_0908         | Bartonella clarridgeiae                                             | 887 |
| 2094 | E6YM96 | E6YM96_9RHIZ | Bacteria | alaS BARRO_50347        | Bartonella rochalimae ATCC BAA-1498                                 | 887 |
| 2095 | E6YRL3 | E6YRL3_9RHIZ | Bacteria | alaS BAR15_130068       | Bartonella sp. AR 15-3                                              | 889 |
| 2096 | E6YW08 | E6YW08_9RHIZ | Bacteria | alaS B11C_110657        | Bartonella sp. 1-1C                                                 | 887 |
| 2097 | E6YZV5 | E6YZV5_9RHIZ | Bacteria | alaS B11C_40248         | Bartonella schoenbuchensis R1                                       | 889 |
| 2098 | E7A685 | E7A685_HAEIF | Bacteria | HIBPF14940              | Haemophilus influenzae F3031                                        | 874 |
| 2099 | E7AB19 | E7AB19_HELFC | Bacteria | alaS Hfelis_06950       | Helicobacter felis (strain ATCC 49179 / NCTC 12436 / CS1)           | 872 |
| 2100 | E7AE41 | E7AE41_HAEIF | Bacteria | HICON_05900             | Haemophilus influenzae F3047                                        | 874 |
| 2101 | E7B0W3 | E7B0W3_YERE1 | Bacteria | Y11_22161               | Yersinia enterocolitica subsp. palearctica serotype O:3 (strain DSM | 875 |
| 2102 | E7BJ36 | E7BJ36_NEIMW | Bacteria | alaS NMAA_1274          | Neisseria meningitidis serogroup A (strain WUE 2594)                | 885 |
| 2103 | O07438 | SYA_MYCTU    | Bacteria | alaS Rv2555c MT2632 MTC | Mycobacterium tuberculosis                                          | 904 |
| 2104 | O34526 | SYA_BACSU    | Bacteria | alaS BSU27410           | Bacillus subtilis                                                   | 878 |
| 2105 | O51238 | SYA_BORBU    | Bacteria | alaS BB_0220            | Borrelia burgdorferi (Lyme disease spirochete)                      | 594 |
| 2106 | O67323 | SYA_AQUAE    | Bacteria | alaS aq_1293            | Aquifex aeolicus                                                    | 867 |
| 2107 | O83980 | SYA_TREPA    | Bacteria | alaS TP_1017            | Treponema pallidum                                                  | 605 |
| 2108 | O84754 | SYA_CHLTR    | Bacteria | alaS CT_749             | Chlamydia trachomatis                                               | 875 |
| 2109 | P00957 | SYA_ECOLI    | Bacteria | alaS lovB b2697 JW2667  | Escherichia coli (strain K12)                                       | 876 |
| 2110 | P27866 | SYA_RHIME    | Bacteria | alaS R01798 SMC00475    | Rhizobium meliloti (Sinorhizobium meliloti)                         | 887 |
| 2111 | P43815 | SYA_HAEIN    | Bacteria | alaS HI_0814            | Haemophilus influenzae                                              | 874 |
| 2112 | P57483 | SYA_BUCAI    | Bacteria | alaS BU403              | Buchnera aphidicola subsp. Acyrthosiphon pisum (Acyrthosiphon pi    | 878 |

|      |        |              |          |                         |                                                                    |     |
|------|--------|--------------|----------|-------------------------|--------------------------------------------------------------------|-----|
| 2113 | P57933 | SYA PASMU    | Bacteria | alaS PM1287             | Pasteurella multocida                                              | 874 |
| 2114 | P59420 | SYA BUCBP    | Bacteria | alaS bbb_364            | Buchnera aphidicola subsp. Baizongia pistaciae (strain Bp)         | 880 |
| 2115 | P61697 | SYA BACC1    | Bacteria | alaS BCE_4471           | Bacillus cereus (strain ATCC 10987)                                | 880 |
| 2116 | P61698 | SYA BDEBA    | Bacteria | alaS Bd0501             | Bdellovibrio bacteriovorus                                         | 907 |
| 2117 | P61699 | SYA CORDI    | Bacteria | alaS DIP1350            | Corynebacterium diphtheriae                                        | 888 |
| 2118 | P61700 | SYA DESVH    | Bacteria | alaS DVU_1089           | Desulfovibrio vulgaris (strain Hildenborough / ATCC 29579 / NCIMB) | 879 |
| 2119 | P61701 | SYA GEOSL    | Bacteria | alaS GSU0148            | Geobacter sulfurreducens                                           | 875 |
| 2120 | P61702 | SYA LACJO    | Bacteria | alaS LJ_0474            | Lactobacillus johnsonii                                            | 882 |
| 2121 | P61704 | SYA MYCMS    | Bacteria | alaS MSC_0178           | Mycoplasma mycoides subsp. mycoides SC                             | 896 |
| 2122 | P61705 | SYA MYCPA    | Bacteria | alaS MAP_1077           | Mycobacterium paratuberculosis                                     | 900 |
| 2123 | P61706 | SYA RHOPA    | Bacteria | alaS RPA3847            | Rhodopseudomonas palustris                                         | 889 |
| 2124 | P61707 | SYA THET2    | Bacteria | alaS TT_C1480           | Thermus thermophilus (strain HB27 / ATCC BAA-163 / DSM 7039)       | 882 |
| 2125 | P61708 | SYA TREDE    | Bacteria | alaS TDE_1659           | Treponema denticola                                                | 600 |
| 2126 | P61709 | SYA WOLPM    | Bacteria | alaS WD_0862            | Wolbachia pipientis wMel                                           | 877 |
| 2127 | P67008 | SYA BRUME    | Bacteria | alaS BMEI0789           | Brucella melitensis                                                | 885 |
| 2128 | P67009 | SYA BRUSU    | Bacteria | alaS BR1201             | Brucella suis                                                      | 885 |
| 2129 | P67010 | SYA STAAM    | Bacteria | alaS SAV1618            | Staphylococcus aureus (strain Mu50 / ATCC 700699)                  | 876 |
| 2130 | P67011 | SYA STAAN    | Bacteria | alaS SA1446             | Staphylococcus aureus (strain N315)                                | 876 |
| 2131 | P70865 | SYA BARBA    | Bacteria | alaS                    | Bartonella bacilliformis                                           | 886 |
| 2132 | P74423 | SYA SYN3     | Bacteria | alaS sl0362             | Synechocystis sp. (strain ATCC 27184 / PCC 6803 / N-1)             | 877 |
| 2133 | P74941 | SYA THET8    | Bacteria | alaS TTHA1831           | Thermus thermophilus (strain HB8 / ATCC 27634 / DSM 579)           | 882 |
| 2134 | Q01XA0 | SYA SOLUE    | Bacteria | alaS Acid_4756          | Solibacter usitatus (strain Ellin6076)                             | 878 |
| 2135 | Q02I63 | SYA PSEAB    | Bacteria | alaS PA14_52600         | Pseudomonas aeruginosa (strain UCBPPP-PA14)                        | 874 |
| 2136 | Q02XE9 | SYA LACLS    | Bacteria | alaS LACR_1887          | Lactococcus lactis subsp. cremoris (strain SK11)                   | 872 |
| 2137 | Q03B02 | SYA LACCP3   | Bacteria | alaS LSEI_0784          | Lactobacillus casei (strain ATCC 334)                              | 881 |
| 2138 | Q03ER8 | SYA PEDPA    | Bacteria | alaS PEPE_1263          | Pediococcus pentosaceus (strain ATCC 25745 / 183-1w)               | 881 |
| 2139 | Q03LZ8 | SYA STRTD    | Bacteria | alaS STER_0493          | Streptococcus thermophilus (strain ATCC BAA-491 / LMD-9)           | 872 |
| 2140 | Q03R43 | SYA LACBA    | Bacteria | alaS LVIS_1223          | Lactobacillus brevis (strain ATCC 367 / JCM 1170)                  | 879 |
| 2141 | Q03YQ2 | SYA LEUMM    | Bacteria | alaS LEUM_0556          | Leuconostoc mesenteroides subsp. mesenteroides (strain ATCC 825)   | 893 |
| 2142 | Q045P6 | SYA LACGA    | Bacteria | alaS LGAS_0421          | Lactobacillus gasserii (strain ATCC 33323 / DSM 20243)             | 882 |
| 2143 | Q048Z3 | SYA LACDB    | Bacteria | alaS LBUL_1486          | Lactobacillus delbrueckii subsp. bulgaricus (strain ATCC BAA-365)  | 877 |
| 2144 | Q04EQ9 | SYA OENOB    | Bacteria | alaS OEOE_1167          | Oenococcus oeni (strain BAA-331 / PSU-1)                           | 885 |
| 2145 | Q04JW5 | SYA STRP2    | Bacteria | alaS SPD_1216           | Streptococcus pneumoniae serotype 2 (strain D39 / NCTC 7466)       | 872 |
| 2146 | Q057H8 | SYA BUCCC    | Bacteria | alaS Bcc_254            | Buchnera aphidicola subsp. Cinara cedri                            | 881 |
| 2147 | Q05VD2 | Q05VD2_9SYNE | Bacteria | RS9916_36647            | Synechococcus sp. RS9916                                           | 892 |
| 2148 | Q061R8 | Q061R8_9SYNE | Bacteria | BL107_07374             | Synechococcus sp. BL107                                            | 887 |
| 2149 | Q085Z9 | SYA SHEFN    | Bacteria | alaS Sfri_1063          | Shewanella frigidimarina (strain NCIMB 400)                        | 874 |
| 2150 | Q0A8K7 | SYA ALHEH    | Bacteria | alaS Mlg_1481           | Alkalilimnicola ehrlichei (strain MLHE-1)                          | 869 |
| 2151 | Q0AHX2 | SYA NITEC    | Bacteria | alaS Neut_0791          | Nitrosomonas eutropha (strain C91)                                 | 863 |
| 2152 | Q0AQY6 | SYA MARMM    | Bacteria | alaS Mmar10_1008        | Maricaulis maris (strain MCS10)                                    | 884 |
| 2153 | Q0AZQ1 | SYA SYNWW    | Bacteria | alaS Swol_0468          | Syntrophomonas wolfei subsp. wolfei (strain Goettingen)            | 880 |
| 2154 | Q0BG79 | SYA BURCM    | Bacteria | alaS Bamb_1286          | Burkholderia ambifaria (strain ATCC BAA-244 / AMMD) (Burkholder)   | 874 |
| 2155 | Q0BLS9 | SYA FRATO    | Bacteria | alaS FTH_1079           | Francisella tularensis subsp. holarctica (strain OSU18)            | 865 |
| 2156 | Q0BSD5 | SYA GRABC    | Bacteria | alaS GbCGDNIH1_1370     | Granulibacter bethesdensis (strain ATCC BAA-1260 / CGDNIH1)        | 880 |
| 2157 | Q0BMY3 | SYA HYPNA    | Bacteria | alaS HNE_2741           | Hyphomonas neptunium (strain ATCC 15444)                           | 881 |
| 2158 | Q0F3T8 | Q0F3T8_9PROT | Bacteria | SPV1_03513              | Mariprofundus ferrooxydans PV-1                                    | 871 |
| 2159 | Q0FAQ6 | Q0FAQ6_9RHOB | Bacteria | OM2255_03197            | Rhodobacterales bacterium HTCC2255                                 | 885 |
| 2160 | Q0FH21 | Q0FH21_9RHOB | Bacteria | R2601_23348             | Pelagibaca bermudensis HTCC2601                                    | 891 |
| 2161 | Q0FZ12 | Q0FZ12_9RHIZ | Bacteria | FP2506_03680            | Fulvimarina pelagi HTCC2506                                        | 912 |
| 2162 | Q0HL60 | SYA SHESM    | Bacteria | alaS Shewmr4_1127       | Shewanella sp. (strain MR-4)                                       | 874 |
| 2163 | Q0HXF8 | SYA SHESR    | Bacteria | alaS Shewmr7_1198       | Shewanella sp. (strain MR-7)                                       | 874 |
| 2164 | Q0I426 | SYA HAES1    | Bacteria | alaS HS_1120            | Haemophilus somnus (strain 129Pt) (Histophilus somni (strain 129P  | 874 |
| 2165 | Q0I6G6 | SYA SYN53    | Bacteria | alaS sync_2768          | Synechococcus sp. (strain CC9311)                                  | 893 |
| 2166 | Q0K823 | SYA CUPNH    | Bacteria | alaS H16_A2769          | Cupriavidus necator (strain ATCC 17699 / H16 / DSM 428 / Stanier)  | 874 |
| 2167 | Q0RF65 | SYA FRAAA    | Bacteria | alaS FRAAL5252          | Frankia alni (strain ACN14a)                                       | 881 |
| 2168 | Q0SON7 | SYA RHOSR    | Bacteria | alaS RHA1_ro07135       | Rhodococcus sp. (strain RHA1)                                      | 890 |
| 2169 | Q0SNU2 | SYA BORAP    | Bacteria | alaS BAPKO_0228         | Borrelia afzelii (strain PKo)                                      | 594 |
| 2170 | Q0SS42 | SYA CLOPS    | Bacteria | alaS CPR_1750           | Clostridium perfringens (strain SM101 / Type A)                    | 879 |
| 2171 | Q0T1C3 | SYA SHIF8    | Bacteria | alaS SFV_2808           | Shigella flexneri serotype 5b (strain 8401)                        | 876 |
| 2172 | Q0TEI3 | SYA ECOL5    | Bacteria | alaS ECP_2657           | Escherichia coli O6:K15:H31 (strain 536 / UPEC)                    | 876 |
| 2173 | Q0TPH4 | SYA CLOP1    | Bacteria | alaS CPF_2033           | Clostridium perfringens (strain ATCC 13124 / NCTC 8237 / Type A)   | 879 |
| 2174 | Q0VNK2 | SYA ALCBS    | Bacteria | alaS ABO_1798           | Alcanivorax borkumensis (strain SK2 / ATCC 700651 / DSM 11573)     | 863 |
| 2175 | Q0YSB8 | Q0YSB8_9CHLB | Bacteria | CferDRAFT_1278          | Chlorobium ferrooxidans DSM 13031                                  | 901 |
| 2176 | Q10VG8 | SYA TRIEI    | Bacteria | alaS Tery_4806          | Trichodesmium erythraeum (strain IMS101)                           | 874 |
| 2177 | Q11IW3 | SYA MESSB    | Bacteria | alaS Meso_1266          | Mesorhizobium sp. (strain BNC1)                                    | 887 |
| 2178 | Q11V49 | SYA CYTH3    | Bacteria | alaS CHU_1446           | Cytophaga hutchinsonii (strain ATCC 33406 / NCIMB 9469)            | 877 |
| 2179 | Q129G8 | SYA POLSJ    | Bacteria | alaS Bpro_2910          | Polaromonas sp. (strain JS666 / ATCC BAA-500)                      | 878 |
| 2180 | Q12PX7 | SYA SHEDO    | Bacteria | alaS Sden_1213          | Shewanella denitrificans (strain OS217 / ATCC BAA-1090 / DSM 15)   | 874 |
| 2181 | Q13AB9 | SYA RHOPS    | Bacteria | alaS RPD_1734           | Rhodopseudomonas palustris (strain BisB5)                          | 891 |
| 2182 | Q13W97 | SYA BURXL    | Bacteria | alaS Bxeno_A3104_Bxe_A1 | Burkholderia xenovorans (strain LB400)                             | 874 |
| 2183 | Q14HB9 | SYA FRAT1    | Bacteria | alaS FTF1096c           | Francisella tularensis subsp. tularensis (strain FSC 198)          | 865 |
| 2184 | Q15RG5 | SYA PSEA6    | Bacteria | alaS Patl_3015          | Pseudoalteromonas atlantica (strain T6c / BAA-1087)                | 865 |
| 2185 | Q165U5 | SYA ROSDO    | Bacteria | alaS RD1_2709           | Roseobacter denitrificans (strain ATCC 33942 / OCh 114) (Erythro)  | 885 |
| 2186 | Q18BE7 | SYA CLOD6    | Bacteria | alaS CD1282             | Clostridium difficile (strain 630)                                 | 879 |
| 2187 | Q1AWA6 | SYA RUBXD    | Bacteria | alaS Rxy1_1359          | Rubrobacter xylanophilus (strain DSM 9941 / NBRC 16129)            | 882 |
| 2188 | Q1B9I0 | SYA MYCSS    | Bacteria | alaS Mmcs_2346          | Mycobacterium sp. (strain MCS)                                     | 897 |
| 2189 | Q1BX19 | SYA BURCA    | Bacteria | alaS Bcen_0927          | Burkholderia cenocepacia (strain AU 1054)                          | 874 |

|      |        |              |          |                         |                                                                     |      |
|------|--------|--------------|----------|-------------------------|---------------------------------------------------------------------|------|
| 2190 | Q1C420 | SYA YERPA    | Bacteria | alaS YPA_2840           | Yersinia pestis bv. Antiqua (strain Antiqua)                        | 738  |
| 2191 | Q1CLK9 | SYA YERNP    | Bacteria | alaS YPN_0789 YP516_084 | Yersinia pestis bv. Antiqua (strain Nepal516)                       | 875  |
| 2192 | Q1G947 | SYA LACDA    | Bacteria | alaS Ldb1607            | Lactobacillus delbrueckii subsp. bulgaricus (strain ATCC 11842 / DS | 877  |
| 2193 | Q1GHA1 | SYA SILST    | Bacteria | alaS TM1040_1232        | Silicibacter sp. (strain TM1040)                                    | 883  |
| 2194 | Q1GSD9 | SYA SPHAL    | Bacteria | alaS Sala_1720          | Sphingopyxis alaskensis (Sphingomonas alaskensis)                   | 884  |
| 2195 | Q1H3U9 | SYA METFK    | Bacteria | alaS Mfla_0568          | Methylobacillus flagellatus (strain KT / ATCC 51484 / DSM 6875)     | 874  |
| 2196 | Q1I6Z8 | SYA PSEE4    | Bacteria | alaS PSEEN3875          | Pseudomonas entomophila (strain L48)                                | 874  |
| 2197 | Q1IJG7 | SYA ACIBL    | Bacteria | alaS Acid345_3983       | Acidobacteria bacterium (strain Ellin345)                           | 1098 |
| 2198 | Q1IW89 | SYA DEIGD    | Bacteria | alaS Dgeo_2201          | Deinococcus geothermalis (strain DSM 11300)                         | 885  |
| 2199 | Q1J5Z4 | SYA STRPF    | Bacteria | alaS MGAS10750_Spy1239  | Streptococcus pyogenes serotype M4 (strain MGAS10750)               | 872  |
| 2200 | Q1JB08 | SYA STRPB    | Bacteria | alaS MGAS2096_Spy1198   | Streptococcus pyogenes serotype M12 (strain MGAS2096)               | 872  |
| 2201 | Q1JG77 | SYA STRPD    | Bacteria | alaS MGAS10270_Spy1202  | Streptococcus pyogenes serotype M2 (strain MGAS10270)               | 872  |
| 2202 | Q1JL53 | SYA STRPC    | Bacteria | alaS MGAS9429_Spy1179   | Streptococcus pyogenes serotype M12 (strain MGAS9429)               | 872  |
| 2203 | Q1K3C1 | Q1K3C1_DESAC | Bacteria | Dace_2919               | Desulfuromonas acetoxidans DSM 684                                  | 880  |
| 2204 | Q1LQ59 | SYA RALME    | Bacteria | alaS Rmet_0831          | Ralstonia metallidurans (strain CH34 / ATCC 43123 / DSM 2839)       | 874  |
| 2205 | Q1MFX9 | SYA RHLI3    | Bacteria | alaS RL2636             | Rhizobium leguminosarum bv. viciae (strain 3841)                    | 884  |
| 2206 | Q1MP42 | SYA LAWIP    | Bacteria | alaS LI1181             | Lawsonia intracellularis (strain PHE/MN1-00)                        | 884  |
| 2207 | Q1MXH1 | Q1MXH1_9GAMM | Bacteria | RED65_02559             | Bermanella marisrubri                                               | 448  |
| 2208 | Q1N815 | Q1N815_9SPHN | Bacteria | SKA58_11518             | Sphingomonas sp. SKA58                                              | 884  |
| 2209 | Q1NYA7 | Q1NYA7_9DELT | Bacteria | MidDRAFT_1604           | Delta proteobacterium MLMS-1                                        | 925  |
| 2210 | Q1PYI8 | Q1PYI8_9BACT | Bacteria | alaS kustd1393          | Candidatus Kuenenia stuttgartiensis                                 | 885  |
| 2211 | Q1QA88 | SYA PSYCK    | Bacteria | alaS Pcryo_1638         | Psychrobacter cryohalolentis (strain K5)                            | 890  |
| 2212 | Q1QMV7 | SYA NITXH    | Bacteria | alaS Nham_1621          | Nitrobacter hamburgensis (strain X14 / DSM 10229)                   | 891  |
| 2213 | Q1QZX1 | SYA CHRSD    | Bacteria | alaS Csal_0625          | Chromohalobacter salexigens (strain DSM 3043 / ATCC BAA-138 / I     | 868  |
| 2214 | Q1R804 | SYA ECOUT    | Bacteria | alaS UT189_C3058        | Escherichia coli (strain UT189 / UPEC)                              | 876  |
| 2215 | Q1V253 | Q1V253_PELUB | Bacteria | PU1002_03121            | Candidatus Pelagibacter ubique HTCC1002                             | 889  |
| 2216 | Q1V5N2 | Q1V5N2_VIBAL | Bacteria | V12G01_13694            | Vibrio alginolyticus 12G01                                          | 860  |
| 2217 | Q1VT56 | Q1VT56_9FLAO | Bacteria | P700755_04198           | Psychroflexus torquis ATCC 700755                                   | 872  |
| 2218 | Q1WT32 | SYA LACS1    | Bacteria | alaS LSL_1111           | Lactobacillus salivarius subsp. salivarius (strain UCC118)          | 880  |
| 2219 | Q1YEB6 | Q1YEB6_MOBAS | Bacteria | SI859A1_01159           | Manganese-oxidizing bacterium (strain SI85-9A1)                     | 890  |
| 2220 | Q1YR94 | Q1YR94_9GAMM | Bacteria | alaS GB2207_03719       | Gamma proteobacterium HTCC2207                                      | 864  |
| 2221 | Q1Z483 | Q1Z483_PHOPR | Bacteria | P3TCK_25026             | Photobacterium profundum 3TCK                                       | 873  |
| 2222 | Q1ZDH3 | Q1ZDH3_9GAMM | Bacteria | PCNPT3_13543            | Psychromonas sp. CNPT3                                              | 869  |
| 2223 | Q1ZN92 | Q1ZN92_PHOAS | Bacteria | VAS14_20506             | Photobacterium angustum (strain S14 / CCUG 15956) (Vibrio sp. (s    | 874  |
| 2224 | Q218Q3 | SYA RHOPB    | Bacteria | alaS RPC_1571           | Rhodospseudomonas palustris (strain BisB18)                         | 890  |
| 2225 | Q21L68 | SYA SACD2    | Bacteria | alaS Sde_1299           | Saccharophagus degradans (strain 2-40 / ATCC 43961 / DSM 1702       | 875  |
| 2226 | Q221G2 | SYA RHOFD    | Bacteria | alaS Rfer_0590          | Rhodoferrax ferrireducens (strain DSM 15236 / ATCC BAA-621 / T11    | 876  |
| 2227 | Q255X6 | SYA CHLFF    | Bacteria | alaS CF0140             | Chlamydomonas reinhardtii (strain Fe/C-56)                          | 875  |
| 2228 | Q26FE2 | Q26FE2_FLABB | Bacteria | BBFL7_02304             | Flavobacteria bacterium (strain BBFL7)                              | 873  |
| 2229 | Q28QV8 | SYA JANSC    | Bacteria | alaS Jann_1987          | Jannaschia sp. (strain CCS1)                                        | 884  |
| 2230 | Q2A3A9 | SYA FRATH    | Bacteria | alaS FTL_1106           | Francisella tularensis subsp. holarctica (strain LVS)               | 865  |
| 2231 | Q2B0V3 | Q2B0V3_9BACI | Bacteria | B14911_01705            | Bacillus sp. NRRL B-14911                                           | 877  |
| 2232 | Q2BQV5 | Q2BQV5_9GAMM | Bacteria | alaS MED92_08126        | Neptuniibacter caesariensis                                         | 854  |
| 2233 | Q2C125 | Q2C125_9GAMM | Bacteria | SKA34_21745             | Photobacterium sp. SKA34                                            | 874  |
| 2234 | Q2C9X5 | Q2C9X5_9RHOB | Bacteria | OG2516_04593            | Oceanicola granulosus HTCC2516                                      | 885  |
| 2235 | Q2FGA8 | SYA STAA3    | Bacteria | alaS SAUSA300_1575      | Staphylococcus aureus (strain USA300)                               | 876  |
| 2236 | Q2FXV9 | SYA STAA8    | Bacteria | alaS SAOUHSC_01722      | Staphylococcus aureus (strain NCTC 8325)                            | 876  |
| 2237 | Q2G8V0 | SYA NOVAD    | Bacteria | alaS Saro_1279          | Novosphingobium aromaticivorans (strain DSM 12444)                  | 881  |
| 2238 | Q2GEP2 | SYA NEOSM    | Bacteria | alaS NSE_0156           | Neorickettsia sennetsu (strain Miyayama)                            | 848  |
| 2239 | Q2GFL5 | SYA EHRCR    | Bacteria | alaS ECH_0981           | Ehrlichia chaffeensis (strain Arkansas)                             | 887  |
| 2240 | Q2GJ36 | SYA ANAPZ    | Bacteria | alaS APH_1059           | Anaplasma phagocytophilum (strain HZ)                               | 876  |
| 2241 | Q2IG40 | SYA ANADE    | Bacteria | alaS Adeh_3784          | Anaeromyxobacter dehalogenans (strain 2CP-C)                        | 905  |
| 2242 | Q2ITM9 | SYA RHOP2    | Bacteria | alaS RPB_3737           | Rhodospseudomonas palustris (strain HaA2)                           | 891  |
| 2243 | Q2J821 | SYA FRASC    | Bacteria | alaS Francci3_3214      | Frankia sp. (strain Cc13)                                           | 881  |
| 2244 | Q2JLC4 | SYA SYNJB    | Bacteria | alaS CYB_1521           | Synechococcus sp. (strain JA-2-3B'a(2-13)) (Cyanobacteria bacteri   | 884  |
| 2245 | Q2JTG8 | SYA SYNJA    | Bacteria | alaS CYA_1881           | Synechococcus sp. (strain JA-3-3Ab) (Cyanobacteria bacterium Yell   | 883  |
| 2246 | Q2K7T4 | SYA RHIEC    | Bacteria | alaS RHE_CH02322        | Rhizobium etli (strain CFN 42 / ATCC 51251)                         | 884  |
| 2247 | Q2KY72 | SYA BORA1    | Bacteria | alaS BAV2356            | Bordetella avium (strain 197N)                                      | 873  |
| 2248 | Q2LPL7 | SYA SYNAS    | Bacteria | alaS SYNAS_03400 SYN_0  | Syntrophus aciditrophicus (strain SB)                               | 878  |
| 2249 | Q2NJ60 | SYA AYWBP    | Bacteria | alaS AYWB_416           | Aster yellows witches'-broom phytoplasma (strain AYWB)              | 864  |
| 2250 | Q2NVL2 | SYA SODGM    | Bacteria | alaS SG0538             | Sodalis glossinidius (strain morsitans)                             | 875  |
| 2251 | Q2P1N1 | SYA XANOM    | Bacteria | alaS XOO2791            | Xanthomonas oryzae pv. oryzae (strain MAFF 311018)                  | 882  |
| 2252 | Q2PY21 | Q2PY21_9BACT | Bacteria |                         | Uncultured marine bacterium Ant39E11                                | 868  |
| 2253 | Q2RHZ3 | SYA MOOTA    | Bacteria | alaS Moth_1644          | Moorella thermoacetica (strain ATCC 39073)                          | 881  |
| 2254 | Q2RQI0 | SYA RHORT    | Bacteria | alaS Rru_A2818          | Rhodospirillum rubrum (strain ATCC 11170 / NCIB 8255)               | 883  |
| 2255 | Q2S2B6 | SYA SALRD    | Bacteria | alaS SRU_1544           | Salinibacter ruber (strain DSM 13855 / M31)                         | 966  |
| 2256 | Q2S8T9 | SYA HAHCH    | Bacteria | alaS HCH_05209          | Hahella chejuensis (strain KCTC 2396)                               | 876  |
| 2257 | Q2SSW4 | SYA MYCCT    | Bacteria | alaS MCAP_0159          | Mycoplasma capricolum subsp. capricolum (strain California kid / A  | 896  |
| 2258 | Q2SV73 | SYA BURTA    | Bacteria | alaS BTH_I2661          | Burkholderia thailandensis (strain E264 / ATCC 700388 / DSM 1327    | 874  |
| 2259 | Q2W1D9 | SYA MAGSA    | Bacteria | alaS amb3532            | Magnetospirillum magneticum (strain AMB-1 / ATCC 700264)            | 878  |
| 2260 | Q2YD40 | SYA NITMU    | Bacteria | alaS Nmul_A0022         | Nitrosospora multiformis (strain ATCC 25196 / NCIMB 11849)          | 862  |
| 2261 | Q2YRU8 | SYA BRUA2    | Bacteria | alaS BAB1_1223          | Brucella abortus (strain 2308)                                      | 885  |
| 2262 | Q2YT60 | SYA STAAB    | Bacteria | alaS SAB1489c           | Staphylococcus aureus (strain bovine RF122 / ET3-1)                 | 876  |
| 2263 | Q30PA9 | SYA SULDN    | Bacteria | alaS Suden_1898         | Sulfurimonas denitrificans (strain ATCC 33889 / DSM 1251) (Thiom    | 849  |
| 2264 | Q30YS5 | SYA DESDG    | Bacteria | alaS Dde_2374           | Desulfovibrio desulfuricans (strain G20)                            | 880  |
| 2265 | Q31DD9 | SYA PROM9    | Bacteria | alaS PMT9312_0045       | Prochlorococcus marinus (strain MIT 9312)                           | 886  |
| 2266 | Q31F91 | SYA THICR    | Bacteria | alaS Tcr_1590           | Thiomicrospira crunogena (strain XCL-2)                             | 864  |



|      |        |              |          |                        |                                                                      |     |
|------|--------|--------------|----------|------------------------|----------------------------------------------------------------------|-----|
| 2267 | Q31PW3 | SYA SYNE7    | Bacteria | alaS Synpcc7942_0876   | Synechococcus elongatus (strain PCC 7942) (Anacystis nidulans R2)    | 876 |
| 2268 | Q31X62 | SYA SHIBS    | Bacteria | alaS SBO_2821          | Shigella boydii serotype 4 (strain Sb227)                            | 876 |
| 2269 | Q32CN1 | SYA SHIDS    | Bacteria | alaS SDY_2893          | Shigella dysenteriae serotype 1 (strain Sd197)                       | 876 |
| 2270 | Q38YN9 | SYA LACSS    | Bacteria | alaS LCA_0387          | Lactobacillus sakei subsp. sakei (strain 23K)                        | 878 |
| 2271 | Q39HB7 | SYA BURS3    | Bacteria | alaS Bcep18194_A4553   | Burkholderia sp. (strain 383) (Burkholderia cepacia (strain ATCC 17) | 874 |
| 2272 | Q39Z77 | SYA GEOMG    | Bacteria | alaS Gmet_0201         | Geobacter metallireducens (strain GS-15 / ATCC 53774 / DSM 7210)     | 876 |
| 2273 | Q3A1W0 | SYA PELCD    | Bacteria | alaS Pcar_2408         | Pelobacter carbinolicus (strain DSM 2380 / Gra Bd 1)                 | 882 |
| 2274 | Q3AEN8 | SYA CARHZ    | Bacteria | alaS CHY_0538          | Carboxydotherrmus hydrogenoformans (strain Z-2901 / DSM 6008)        | 874 |
| 2275 | Q3AGN4 | SYA SYNCS    | Bacteria | alaS Syncc9605_2518    | Synechococcus sp. (strain CC9605)                                    | 889 |
| 2276 | Q3ATN3 | SYA CHLCH    | Bacteria | alaS Cag_0369          | Chlorobium chlorochromatii (strain CaD3)                             | 886 |
| 2277 | Q3AVV3 | SYA SYN59    | Bacteria | alaS Syncc9902_2173    | Synechococcus sp. (strain CC9902)                                    | 890 |
| 2278 | Q3B1I7 | SYA PELLD    | Bacteria | alaS Plut_1952         | Pelodictyon luteolum (strain DSM 273) (Chlorobium luteolum (strain   | 887 |
| 2279 | Q3BUQ7 | SYA XANC5    | Bacteria | alaS XCV1775           | Xanthomonas campestris pv. vesicatoria (strain 85-10)                | 882 |
| 2280 | Q3D2Y9 | Q3D2Y9_STRAG | Bacteria | alaS SAI_0890          | Streptococcus agalactiae H36B                                        | 658 |
| 2281 | Q3D855 | Q3D855_STRAG | Bacteria | alaS SAN_0911          | Streptococcus agalactiae COH1                                        | 872 |
| 2282 | Q3D6W6 | Q3D6W6_STRAG | Bacteria | alaS SAM_0837          | Streptococcus agalactiae CJB111                                      | 872 |
| 2283 | Q3DNA0 | Q3DNA0_STRAG | Bacteria | alaS SAL_0865          | Streptococcus agalactiae 515                                         | 872 |
| 2284 | Q3DQX5 | Q3DQX5_STRAG | Bacteria | alaS SAJ_0861          | Streptococcus agalactiae 18RS21                                      | 872 |
| 2285 | Q3ILF3 | SYA PSEHT    | Bacteria | alaS PSHAa0532         | Pseudoalteromonas haloplanktis (strain TAC 125)                      | 868 |
| 2286 | Q3J0R1 | SYA RHOS4    | Bacteria | alaS RHOS4_20550_RSP_0 | Rhodobacter sphaeroides (strain ATCC 17023 / 2.4.1 / NCIB 8253 /     | 883 |
| 2287 | Q3JCK8 | SYA NITOC    | Bacteria | alaS Noc_0926          | Nitrosococcus oceani (strain ATCC 19707 / NCIMB 11848)               | 873 |
| 2288 | Q3JT87 | SYA BURP1    | Bacteria | alaS BURPS1710b_1815   | Burkholderia pseudomallei (strain 1710b)                             | 874 |
| 2289 | Q3K1P7 | SYA STRA1    | Bacteria | alaS SAK_0934          | Streptococcus agalactiae serotype Ia                                 | 872 |
| 2290 | Q3K892 | SYA PSEPF    | Bacteria | alaS Pfl01_4275        | Pseudomonas fluorescens (strain Pf0-1)                               | 874 |
| 2291 | Q3KKU4 | SYA CHLTA    | Bacteria | alaS CTA_0815          | Chlamydia trachomatis serovar A (strain HAR-13 / ATCC VR-571B)       | 875 |
| 2292 | Q3MGN4 | SYA ANAVT    | Bacteria | alaS Ava_0226          | Anabaena variabilis (strain ATCC 29413 / PCC 7937)                   | 880 |
| 2293 | Q3R741 | Q3R741_XYLFA | Bacteria | XfasoDRAFT_2887        | Xylella fastidiosa subsp. sandyi Ann-1                               | 884 |
| 2294 | Q3RE84 | Q3RE84_XYLFA | Bacteria | XfasaDRAFT_0566        | Xylella fastidiosa Dixon                                             | 884 |
| 2295 | Q3SLA9 | SYA THIDA    | Bacteria | alaS Tbd_0553          | Thiobacillus denitrificans (strain ATCC 25259)                       | 872 |
| 2296 | Q3ST43 | SYA NITWN    | Bacteria | alaS Nwi_1287          | Nitrobacter winogradskyi (strain Nb-255 / ATCC 25391)                | 891 |
| 2297 | Q3YSV8 | SYA EHRJ     | Bacteria | alaS Ecaj_0146         | Ehrlichia canis (strain Jake)                                        | 887 |
| 2298 | Q3YGG6 | SYA SHISS    | Bacteria | alaS SSON_2841         | Shigella sonnei (strain Ss046)                                       | 876 |
| 2299 | Q40JC2 | Q40JC2_EHRCH | Bacteria | EchaDRAFT_0330         | Ehrlichia chaffeensis str. Sapulpa                                   | 887 |
| 2300 | Q46I13 | SYA PROMT    | Bacteria | alaS PMN2A_1377        | Prochlorococcus marinus (strain NATL2A)                              | 886 |
| 2301 | Q474F4 | SYA CUPPJ    | Bacteria | alaS Reut_A0850        | Cupriavidus pinatubonensis (strain JMP134 / LMG 1197) (Alcaligenes   | 874 |
| 2302 | Q47AU8 | SYA DECAR    | Bacteria | alaS Daro_3303         | Dechloromonas aromatica (strain RCB)                                 | 871 |
| 2303 | Q47N66 | SYA THEFY    | Bacteria | alaS Tfu_2070          | Thermobifida fusca (strain YX)                                       | 889 |
| 2304 | Q487H5 | SYA COLP3    | Bacteria | alaS CPS_1042          | Colwellia psychrerythraea (strain 34H / ATCC BAA-681) (Vibrio psych  | 876 |
| 2305 | Q48G25 | SYA PSE14    | Bacteria | alaS PSPPH_3512        | Pseudomonas syringae pv. phaseolicola (strain 1448A / Race 6)        | 874 |
| 2306 | Q48SS4 | SYA STRPM    | Bacteria | alaS M28_Spy1126       | Streptococcus pyogenes serotype M28                                  | 872 |
| 2307 | Q493M6 | SYA BLOPB    | Bacteria | alaS BPEN_174          | Blochmannia pennsylvanicus (strain BPEN)                             | 879 |
| 2308 | Q49Y56 | SYA STAS1    | Bacteria | alaS SSP1143           | Staphylococcus saprophyticus subsp. saprophyticus (strain ATCC 15    | 876 |
| 2309 | Q4A633 | SYA MYCS5    | Bacteria | alaS MS53_0376         | Mycoplasma synoviae (strain 53)                                      | 878 |
| 2310 | Q4A8G4 | SYA MYCH7    | Bacteria | alaS MHP7448_0201      | Mycoplasma hyopneumoniae (strain 7448)                               | 883 |
| 2311 | Q4AAD3 | SYA MYCHJ    | Bacteria | alaS MHJ_0197          | Mycoplasma hyopneumoniae (strain J / ATCC 25934 / NCTC 10110)        | 883 |
| 2312 | Q4BVF9 | Q4BVF9_CROWT | Bacteria | CwatDRAFT_0388         | Crocospaera watsonii WH 8501                                         | 615 |
| 2313 | Q4E8A4 | Q4E8A4_9RICK | Bacteria | alaS WwSim0411         | Wolbachia endosymbiont of Drosophila simulans                        | 845 |
| 2314 | Q4ECR2 | Q4ECR2_9RICK | Bacteria | alaS WwAna1494         | Wolbachia endosymbiont of Drosophila ananassae                       | 880 |
| 2315 | Q4EGQ9 | Q4EGQ9_LISMO | Bacteria | alaS LMOh7858_1603     | Listeria monocytogenes serotype 4b str. H7858                        | 879 |
| 2316 | Q4ENU6 | Q4ENU6_LISMO | Bacteria | alaS LMOF6854_1550     | Listeria monocytogenes serotype 1/2a str. F6854                      | 879 |
| 2317 | Q4FMX6 | SYA PELUB    | Bacteria | alaS SAR11_0643        | Pelagibacter ubique                                                  | 889 |
| 2318 | Q4FRQ0 | SYA PSYA2    | Bacteria | alaS Psyc_1460         | Psychrobacter arcticus (strain DSM 17307 / 273-4)                    | 890 |
| 2319 | Q4JVF5 | SYA CORJK    | Bacteria | alaS jk1038            | Corynebacterium jeikeium (strain K411)                               | 887 |
| 2320 | Q4K843 | SYA PSEF5    | Bacteria | alaS PFL_4506          | Pseudomonas fluorescens (strain Pf-5 / ATCC BAA-477)                 | 874 |
| 2321 | Q4L6W5 | SYA STAHL    | Bacteria | alaS SH1301            | Staphylococcus haemolyticus (strain JCSC1435)                        | 876 |
| 2322 | Q4MRZ1 | Q4MRZ1_BACCE | Bacteria | alaS BCE_G9241_4442    | Bacillus cereus G9241                                                | 880 |
| 2323 | Q4QM86 | SYA HAEI8    | Bacteria | alaS NTHI0978          | Haemophilus influenzae (strain 86-028NP)                             | 874 |
| 2324 | Q4UJT5 | SYA RICFE    | Bacteria | alaS RF_1353           | Rickettsia felis (Rickettsia azadi)                                  | 878 |
| 2325 | Q4UTR6 | SYA XANC8    | Bacteria | alaS XC_2507           | Xanthomonas campestris pv. campestris (strain 8004)                  | 882 |
| 2326 | Q4ZQI4 | SYA PSEU2    | Bacteria | alaS Psyr_3556         | Pseudomonas syringae pv. syringae (strain B728a)                     | 874 |
| 2327 | Q56273 | SYA THIFE    | Bacteria | alaS                   | Thiobacillus ferrooxidans (Acidithiobacillus ferrooxidans)           | 877 |
| 2328 | Q56648 | SYA VIBCH    | Bacteria | alaS VC_0545           | Vibrio cholerae                                                      | 860 |
| 2329 | Q57CU0 | SYA BRUAB    | Bacteria | alaS BruAb1_1206       | Bruceella abortus                                                    | 885 |
| 2330 | Q57KU6 | SYA SALCH    | Bacteria | alaS SCH_2760          | Salmonella choleraesuis                                              | 876 |
| 2331 | Q5E7G5 | SYA VIBF1    | Bacteria | alaS VF_0536           | Vibrio fischeri (strain ATCC 700601 / ES114)                         | 859 |
| 2332 | Q5F7C4 | SYA NIEG1    | Bacteria | alaS NGO1254           | Neisseria gonorrhoeae (strain ATCC 700825 / FA 1090)                 | 874 |
| 2333 | Q5FH56 | SYA EHRRG    | Bacteria | alaS ERGA_CDS_01420    | Ehrlichia ruminantium (strain Gardel)                                | 887 |
| 2334 | Q5FLW6 | SYA LACAC    | Bacteria | alaS LBA0417           | Lactobacillus acidophilus                                            | 879 |
| 2335 | Q5GSS5 | SYA WOLTR    | Bacteria | alaS Wbm0361           | Wolbachia sp. subsp. Brugia malayi (strain TRS)                      | 875 |
| 2336 | Q5GYM8 | SYA XANOR    | Bacteria | alaS XOO2939           | Xanthomonas oryzae pv. oryzae                                        | 882 |
| 2337 | Q5HC27 | SYA EHRRW    | Bacteria | alaS Erum1500_ERWE_CDS | Ehrlichia ruminantium (strain Welgevonden)                           | 887 |
| 2338 | Q5HFE4 | SYA STAAC    | Bacteria | alaS SACOL1673         | Staphylococcus aureus (strain COL)                                   | 876 |
| 2339 | Q5HNT2 | SYA STAFQ    | Bacteria | alaS SERP1182          | Staphylococcus epidermidis (strain ATCC 35984 / RP62A)               | 876 |
| 2340 | Q5KWU5 | SYA GEOKA    | Bacteria | alaS GK2556            | Geobacillus kaustophilus                                             | 887 |
| 2341 | Q5L512 | SYA CHLAB    | Bacteria | alaS CAB842            | Chlamydia abortus                                                    | 875 |
| 2342 | Q5LHE6 | SYA BACFN    | Bacteria | alaS BF0689            | Bacteroides fragilis (strain ATCC 25285 / NCTC 9343)                 | 872 |
| 2343 | Q5LRU1 | SYA SILPO    | Bacteria | alaS SPO2033           | Silicibacter pomeroyi                                                | 890 |



|      |        |              |          |                         |                                                                    |     |
|------|--------|--------------|----------|-------------------------|--------------------------------------------------------------------|-----|
| 2344 | Q5M126 | SYA STRT1    | Bacteria | alaS str0457            | Streptococcus thermophilus (strain CNRZ 1066)                      | 872 |
| 2345 | Q5M5L5 | SYA STRT2    | Bacteria | alaS stu0457            | Streptococcus thermophilus (strain ATCC BAA-250 / LMG 18311)       | 872 |
| 2346 | Q5N4B5 | SYA SYNPG    | Bacteria | alaS syc0664_c          | Synechococcus sp. (strain ATCC 27144 / PCC 6301 / SAUG 1402/1)     | 876 |
| 2347 | Q5NFW7 | SYA FRATT    | Bacteria | alaS FTT_1096c          | Francisella tularensis subsp. tularensis                           | 865 |
| 2348 | Q5P7Q3 | SYA AROAE    | Bacteria | alaS AZOSEA05360 ebA102 | Aromatoleum aromaticum (strain EbN1) (Azoarcus sp. (strain EbN1)   | 873 |
| 2349 | Q5PBJ0 | SYA ANAMM    | Bacteria | alaS AM224              | Anaplasma marginale (strain St. Maries)                            | 882 |
| 2350 | Q5PF17 | SYA SALPA    | Bacteria | alaS SPA2685            | Salmonella paratyphi A                                             | 876 |
| 2351 | Q5QUV7 | SYA IDILO    | Bacteria | alaS IL1738             | Idiomarina loihiensis                                              | 865 |
| 2352 | Q5WHM8 | SYA BACSK    | Bacteria | alaS ABC1592            | Bacillus clausii (strain KSM-K16)                                  | 876 |
| 2353 | Q5WVQ2 | SYA LEGPL    | Bacteria | alaS lpl1763            | Legionella pneumophila (strain Lens)                               | 860 |
| 2354 | Q5X4B7 | SYA LEGPA    | Bacteria | alaS lpp1763            | Legionella pneumophila (strain Paris)                              | 860 |
| 2355 | Q5XBH1 | SYA STRP6    | Bacteria | alaS M6_Spy1107         | Streptococcus pyogenes serotype M6                                 | 872 |
| 2356 | Q5YTJ9 | SYA NOCFA    | Bacteria | alaS NFA_36440          | Nocardia farcinica                                                 | 888 |
| 2357 | Q5ZUJ9 | SYA LEGPH    | Bacteria | alaS lpg1799            | Legionella pneumophila subsp. pneumophila (strain Philadelphia 1 / | 860 |
| 2358 | Q601M2 | SYA MYCH2    | Bacteria | alaS mhp180             | Mycoplasma hypopneumoniae (strain 232)                             | 883 |
| 2359 | Q60BS6 | SYA METCA    | Bacteria | alaS MCA0389            | Methylococcus capsulatus                                           | 867 |
| 2360 | Q62KZ3 | SYA BURMA    | Bacteria | alaS BMA0895            | Burkholderia mallei (Pseudomonas mallei)                           | 874 |
| 2361 | Q634F6 | SYA BACCZ    | Bacteria | alaS BCE33L4132         | Bacillus cereus (strain ZK / E33L)                                 | 880 |
| 2362 | Q63TF9 | SYA BURPS    | Bacteria | alaS BPSL2009           | Burkholderia pseudomallei (Pseudomonas pseudomallei)               | 874 |
| 2363 | Q64YB4 | SYA BACFR    | Bacteria | alaS BF0761             | Bacteroides fragilis                                               | 872 |
| 2364 | Q65GS5 | SYA BACL D   | Bacteria | alaS BLI02869 BL02033   | Bacillus licheniformis (strain DSM 13 / ATCC 14580)                | 878 |
| 2365 | Q65VQ5 | SYA MANSM    | Bacteria | alaS MS0348             | Mannheimia succiniciproducens (strain MBEL55E)                     | 875 |
| 2366 | Q662E4 | SYA BORGA    | Bacteria | alaS BG0223             | Borrelia garinii                                                   | 594 |
| 2367 | Q66E68 | SYA YERPS    | Bacteria | alaS YPTB0825           | Yersinia pseudotuberculosis                                        | 875 |
| 2368 | Q67MV8 | SYA SYMTH    | Bacteria | alaS STH2000            | Symbiobacterium thermophilum                                       | 872 |
| 2369 | Q68VQ7 | SYA RICTY    | Bacteria | alaS RT0845             | Rickettsia typhi                                                   | 877 |
| 2370 | Q6A8I8 | SYA PROAC    | Bacteria | alaS PPA1178            | Propionibacterium acnes                                            | 892 |
| 2371 | Q6AFA1 | SYA LEIXX    | Bacteria | alaS Lxx10910           | Leifsonia xyli subsp. xyli                                         | 885 |
| 2372 | Q6AQ16 | SYA DESPS    | Bacteria | alaS DP0828             | Desulfotalea psychrophila                                          | 882 |
| 2373 | Q6D1T0 | SYA ERWCT    | Bacteria | alaS ECA3367            | Erwinia carotovora subsp. atroseptica (Pectobacterium atrosepticum | 875 |
| 2374 | Q6F0K3 | SYA MESFL    | Bacteria | alaS Mfl613             | Mesoplasma florum (Acholeplasma florum)                            | 892 |
| 2375 | Q6FCT2 | SYA ACIAD    | Bacteria | alaS ACIAD1253          | Acinetobacter sp. (strain ADP1)                                    | 878 |
| 2376 | Q6FZF1 | SYA BARQU    | Bacteria | alaS BQ07940            | Bartonella quintana (Rochalimaea quintana)                         | 888 |
| 2377 | Q6G2Z4 | SYA BARHE    | Bacteria | alaS BH10220            | Bartonella henselae (Rochalimaea henselae)                         | 887 |
| 2378 | Q6G8V1 | SYA STAAS    | Bacteria | alaS SAS1554            | Staphylococcus aureus (strain MSSA476)                             | 876 |
| 2379 | Q6GG85 | SYA STAAR    | Bacteria | alaS SAR1697            | Staphylococcus aureus (strain MRSA252)                             | 876 |
| 2380 | Q6HDD7 | SYA BACHK    | Bacteria | alaS BT9727_4121        | Bacillus thuringiensis subsp. konkukian                            | 880 |
| 2381 | Q6LMU3 | SYA PHOPR    | Bacteria | alaS PBPR3067           | Photobacterium profundum (Photobacterium sp. (strain S59))         | 873 |
| 2382 | Q6MB06 | SYA PARUW    | Bacteria | alaS pc1519             | Protochlamydia amoebophila (strain UWE25)                          | 878 |
| 2383 | Q6YQR8 | SYA ONYPE    | Bacteria | alaS PAM_305            | Onion yellows phytoplasma                                          | 864 |
| 2384 | Q71ZG6 | SYA LISMF    | Bacteria | alaS LMOF2365_1523      | Listeria monocytogenes serotype 4b (strain F2365)                  | 879 |
| 2385 | Q7MHR6 | SYA VIBVY    | Bacteria | alaS VV2803             | Vibrio vulnificus (strain YJ016)                                   | 860 |
| 2386 | Q7MV54 | SYA PORGI    | Bacteria | alaS PG_1246            | Porphyromonas gingivalis (Bacteroides gingivalis)                  | 876 |
| 2387 | Q7N7A5 | SYA PHOLL    | Bacteria | alaS plu1250            | Photorhabdus luminescens subsp. laumondii                          | 876 |
| 2388 | Q7NI36 | SYA GLOVI    | Bacteria | alaS gli2348            | Gloeobacter violaceus                                              | 871 |
| 2389 | Q7NXM2 | SYA CHRVO    | Bacteria | alaS CV_1604            | Chromobacterium violaceum                                          | 877 |
| 2390 | Q7P6H0 | Q7P6H0_FUSNV | Bacteria | FNV1359                 | Fusobacterium nucleatum subsp. vincentii ATCC 49256                | 867 |
| 2391 | Q7PA66 | Q7PA66_RICSI | Bacteria | rsib_orf.769            | Rickettsia sibirica 246                                            | 878 |
| 2392 | Q7TYB1 | SYA MYCBO    | Bacteria | alaS Mb2585c            | Mycobacterium bovis                                                | 904 |
| 2393 | Q7U3R9 | SYA SYNXP    | Bacteria | alaS SYNW2360           | Synechococcus sp. (strain WH8102)                                  | 889 |
| 2394 | Q7UBU3 | SYA SHIFL    | Bacteria | alaS SF2720_S2911       | Shigella flexneri                                                  | 876 |
| 2395 | Q7V3N0 | SYA PROMP    | Bacteria | alaS PMM0044            | Prochlorococcus marinus subsp. pastoris (strain CCMP1986 / MED4    | 886 |
| 2396 | Q7V419 | SYA PROMM    | Bacteria | alaS PMT_2157           | Prochlorococcus marinus (strain MIT 9313)                          | 892 |
| 2397 | Q7VEG5 | SYA PROMA    | Bacteria | alaS Pro_0048           | Prochlorococcus marinus                                            | 892 |
| 2398 | Q7VHV4 | SYA HELHP    | Bacteria | alaS HH_0859            | Helicobacter hepaticus                                             | 892 |
| 2399 | Q7VLK0 | SYA HAEDU    | Bacteria | alaS HD_1429            | Haemophilus ducreyi                                                | 874 |
| 2400 | Q7VXE1 | SYA BORPE    | Bacteria | alaS lovB_BP1836        | Bordetella pertussis                                               | 874 |
| 2401 | Q7W6N4 | SYA BORPA    | Bacteria | alaS lovB_BPP2870       | Bordetella parapertussis                                           | 874 |
| 2402 | Q7WHL6 | SYA BORBR    | Bacteria | alaS lovB_BB3191        | Bordetella bronchiseptica (Alcaligenes bronchisepticus)            | 874 |
| 2403 | Q817Z0 | SYA BACCR    | Bacteria | alaS BC_4383            | Bacillus cereus (strain ATCC 14579 / DSM 31)                       | 880 |
| 2404 | Q81LK0 | SYA BACAN    | Bacteria | alaS BA_4616_GBAA_4616  | Bacillus anthracis                                                 | 880 |
| 2405 | Q821R2 | SYA CHLCV    | Bacteria | alaS CCA_00876          | Chlamydomonas reinhardtii                                          | 875 |
| 2406 | Q827S4 | SYA STRAW    | Bacteria | alaS SAV_6850           | Streptomyces avermitilis                                           | 890 |
| 2407 | Q82TF8 | SYA NITEU    | Bacteria | alaS NE1930             | Nitrosomonas europaea                                              | 863 |
| 2408 | Q835J8 | SYA ENTFA    | Bacteria | alaS EF_1379            | Enterococcus faecalis (Streptococcus faecalis)                     | 880 |
| 2409 | Q83CQ6 | SYA COXBU    | Bacteria | alaS CBU_1052           | Coxiella burnetii                                                  | 865 |
| 2410 | Q83GD1 | SYA TROWT    | Bacteria | alaS TWT_376            | Tropheryma whipplei (strain Twist) (Whipple's bacillus)            | 880 |
| 2411 | Q83HV0 | SYA TROW8    | Bacteria | alaS TW393              | Tropheryma whipplei (strain TW08/27) (Whipple's bacillus)          | 880 |
| 2412 | Q878X3 | SYA STRP3    | Bacteria | alaS SpyM3_1058_SPs0805 | Streptococcus pyogenes serotype M3                                 | 872 |
| 2413 | Q87F43 | SYA XYLFT    | Bacteria | alaS PD_0094            | Xylella fastidiosa (strain Temecula1 / ATCC 700964)                | 884 |
| 2414 | Q87LR3 | SYA VIBPA    | Bacteria | alaS VP2548             | Vibrio parahaemolyticus                                            | 860 |
| 2415 | Q88E18 | SYA PSEPK    | Bacteria | alaS PP_4474            | Pseudomonas putida (strain KT2440)                                 | 874 |
| 2416 | Q88V10 | SYA LACPL    | Bacteria | alaS lp_2277            | Lactobacillus plantarum                                            | 880 |
| 2417 | Q896F2 | SYA CLOTE    | Bacteria | alaS CTC_01055          | Clostridium tetani                                                 | 879 |
| 2418 | Q89I89 | SYA BRAJA    | Bacteria | alaS bli5750            | Bradyrhizobium japonicum                                           | 892 |
| 2419 | Q8A0M6 | SYA BACTN    | Bacteria | alaS BT_3995            | Bacteroides thetaiotaomicron                                       | 872 |
| 2420 | Q8CSA7 | SYA STAES    | Bacteria | alaS SE_1301            | Staphylococcus epidermidis (strain ATCC 12228)                     | 876 |

|      |        |              |          |                           |                                                                                      |      |
|------|--------|--------------|----------|---------------------------|--------------------------------------------------------------------------------------|------|
| 2421 | Q8CWY0 | SYA STRMU    | Bacteria | alaS SMU_650              | Streptococcus mutans                                                                 | 872  |
| 2422 | Q8DC49 | SYA VIBVU    | Bacteria | alaS VV1_1593             | Vibrio vulnificus                                                                    | 860  |
| 2423 | Q8DH56 | SYA THEEB    | Bacteria | alaS tli2103              | Thermosynechococcus elongatus (strain BP-1)                                          | 882  |
| 2424 | Q8DPC7 | SYA STRR6    | Bacteria | alaS spr1240              | Streptococcus pneumoniae (strain ATCC BAA-255 / R6)                                  | 872  |
| 2425 | Q8E0C4 | SYA STRA5    | Bacteria | alaS SAG0810              | Streptococcus agalactiae serotype V                                                  | 872  |
| 2426 | Q8E600 | SYA STRA3    | Bacteria | alaS gbs0829              | Streptococcus agalactiae serotype III                                                | 872  |
| 2427 | Q8EBS1 | SYA SHEON    | Bacteria | alaS SO_3428              | Shewanella oneidensis                                                                | 874  |
| 2428 | Q8EPS9 | SYA OCEIH    | Bacteria | alaS OB2009               | Oceanobacillus iheyensis                                                             | 879  |
| 2429 | Q8FT23 | SYA COREF    | Bacteria | alaS CE1748               | Corynebacterium efficiens                                                            | 890  |
| 2430 | Q8G5W9 | SYA BIFLO    | Bacteria | alaS BL0882               | Bifidobacterium longum                                                               | 893  |
| 2431 | Q8GDZ1 | Q8GDZ1_HELMO | Bacteria |                           | Heliobacillus mobilis                                                                | 883  |
| 2432 | Q8K9E7 | SYA BUCAP    | Bacteria | alaS BUsg_390             | Buchnera aphidicola subsp. Schizaphis graminum                                       | 883  |
| 2433 | Q8KG04 | SYA CHLTE    | Bacteria | alaS CT0166               | Chlorobium tepidum                                                                   | 885  |
| 2434 | Q8NQ22 | SYA CORGL    | Bacteria | alaS Cgl1632_cg1838       | Corynebacterium glutamicum (Brevibacterium flavum)                                   | 888  |
| 2435 | Q8NW87 | SYA STAAW    | Bacteria | alaS MW1568               | Staphylococcus aureus (strain MW2)                                                   | 876  |
| 2436 | Q8P0E6 | SYA STRP8    | Bacteria | alaS spyM18_1399          | Streptococcus pyogenes serotype M18                                                  | 872  |
| 2437 | Q8P9X0 | SYA XANCP    | Bacteria | alaS XCC1724              | Xanthomonas campestris pv. campestris                                                | 882  |
| 2438 | Q8PLQ0 | SYA XANAC    | Bacteria | alaS XAC1742              | Xanthomonas axonopodis pv. citri (Citrus canker)                                     | 882  |
| 2439 | Q8RAH4 | SYA THETN    | Bacteria | alaS TTE1248              | Thermoanaerobacter tengcongensis                                                     | 878  |
| 2440 | Q8RFJ8 | SYA FUSNN    | Bacteria | alaS FN0697               | Fusobacterium nucleatum subsp. nucleatum                                             | 867  |
| 2441 | Q8UE87 | SYA AGRT5    | Bacteria | alaS Atu1873_AGR_C_3437   | Agrobacterium tumefaciens (strain C58 / ATCC 33970)                                  | 887  |
| 2442 | Q8X3W8 | SYA ECO57    | Bacteria | alaS Z3999_EC53554        | Escherichia coli O157:H7                                                             | 876  |
| 2443 | Q8XJH6 | SYA CLOPE    | Bacteria | alaS CPE1780              | Clostridium perfringens                                                              | 879  |
| 2444 | Q8Y193 | SYA RALSO    | Bacteria | alaS RSc0797_RS05040      | Ralstonia solanacearum (Pseudomonas solanacearum)                                    | 884  |
| 2445 | Q8Y722 | SYA LISMO    | Bacteria | alaS lmo1504              | Listeria monocytogenes                                                               | 879  |
| 2446 | Q8YUD4 | SYA NOSS1    | Bacteria | alaS alr2418              | Nostoc sp. (strain PCC 7120 / UTEX 2576)                                             | 880  |
| 2447 | Q8Z4D5 | SYA SALT1    | Bacteria | alaS STY2948_t2728        | Salmonella typhi                                                                     | 876  |
| 2448 | Q8ZBT8 | SYA YERPE    | Bacteria | alaS YPO3305_y0883_YP_03  | Yersinia pestis                                                                      | 875  |
| 2449 | Q8ZMK6 | SYA SALT2    | Bacteria | alaS STM2827              | Salmonella typhimurium                                                               | 876  |
| 2450 | Q92BK9 | SYA LISIN    | Bacteria | alaS lin1539              | Listeria innocua                                                                     | 879  |
| 2451 | Q92G00 | SYA RICCN    | Bacteria | alaS RC1327               | Rickettsia conorii                                                                   | 878  |
| 2452 | Q97IG3 | SYA CLOAB    | Bacteria | alaS CA_C1678             | Clostridium acetobutylicum                                                           | 881  |
| 2453 | Q97Q48 | SYA STRPN    | Bacteria | alaS SP_1383              | Streptococcus pneumoniae                                                             | 872  |
| 2454 | Q98NQ5 | SYA RHILO    | Bacteria | alaS mlr0032              | Rhizobium loti (Mesorhizobium loti)                                                  | 888  |
| 2455 | Q98Q12 | SYA MYCPU    | Bacteria | alaS MYPU_5570            | Mycoplasma pulmonis                                                                  | 873  |
| 2456 | Q99Z57 | SYA STRP1    | Bacteria | alaS SPy_1389_M5005_Spy   | Streptococcus pyogenes serotype M1                                                   | 872  |
| 2457 | Q9A5C1 | SYA CAUCR    | Bacteria | alaS CC_2529              | Caulobacter crescentus (Caulobacter vibrioides)                                      | 880  |
| 2458 | Q9CCT0 | SYA MYCLE    | Bacteria | alaS ML0512               | Mycobacterium leprae                                                                 | 908  |
| 2459 | Q9CEW0 | SYA LACLA    | Bacteria | alaS LL1724_L0343         | Lactococcus lactis subsp. lactis (Streptococcus lactis)                              | 872  |
| 2460 | Q9I553 | SYA PSEAE    | Bacteria | alaS PA0903               | Pseudomonas aeruginosa                                                               | 874  |
| 2461 | Q9JTG4 | SYA NEIMA    | Bacteria | alaS NMA1788              | Neisseria meningitidis serogroup A                                                   | 874  |
| 2462 | Q9JYG6 | SYA NEIMB    | Bacteria | alaS NMB1595              | Neisseria meningitidis serogroup B                                                   | 874  |
| 2463 | Q9KDE6 | SYA BACHD    | Bacteria | alaS BH1267               | Bacillus halodurans                                                                  | 879  |
| 2464 | Q9KXP9 | SYA STRCO    | Bacteria | alaS SCO1501_SC9C5.25c    | Streptomyces coelicolor                                                              | 890  |
| 2465 | Q9PH22 | SYA XYLFA    | Bacteria | alaS XF_0124              | Xylella fastidiosa                                                                   | 884  |
| 2466 | Q9PLH5 | SYA CHLMU    | Bacteria | alaS TC_0125              | Chlamydia muridarum                                                                  | 875  |
| 2467 | Q9PQC2 | SYA UREPA    | Bacteria | alaS UU369                | Ureaplasma parvum (Ureaplasma urealyticum biotype 1)                                 | 906  |
| 2468 | Q9RNN8 | SYA ZYMMO    | Bacteria | alaS ZMO0845              | Zymomonas mobilis                                                                    | 890  |
| 2469 | Q9RS27 | SYA DEIRA    | Bacteria | alaS DR_2300              | Deinococcus radiodurans                                                              | 890  |
| 2470 | Q9X1B6 | SYA THEMA    | Bacteria | alaS TM_1396              | Thermotoga maritima                                                                  | 863  |
| 2471 | Q9XDM3 | SYA AQUPY    | Bacteria | alaS                      | Aquifex pyrophilus                                                                   | 871  |
| 2472 | Q9Z714 | SYA CHLPN    | Bacteria | alaS CPn_0892_CP_0974_C   | Chlamydia pneumoniae (Chlamydophila pneumoniae)                                      | 872  |
| 2473 | Q9ZCA4 | SYA RICPR    | Bacteria | alaS RP856                | Rickettsia prowazekii                                                                | 877  |
| 2474 | A1A5T1 | A1A5T1_DANRE | Eukarya  | aars                      | Danio rerio (Zebrafish) (Brachydanio rerio)                                          | 966  |
| 2475 | A1C3S4 | A1C3S4_ASPCL | Eukarya  | ACLA_057200               | Aspergillus clavatus                                                                 | 961  |
| 2476 | A2R938 | A2R938_ASPNC | Eukarya  | An16g09320                | Aspergillus niger (strain CBS 513.88 / FGSC A1513)                                   | 961  |
| 2477 | A3LR13 | A3LR13_PICST | Eukarya  | ALA1_PICST_88206          | Pichia stipitis (Yeast)                                                              | 954  |
| 2478 | A4QRE3 | A4QRE3_MAGO7 | Eukarya  | MGG_03607                 | Magnaporthe oryzae (strain 70-15 / FGSC 8958) (Rice blast fungus)                    | 961  |
| 2479 | A5DAB8 | A5DAB8_PICGU | Eukarya  | PGUG_00223                | Pichia guilliermondii (Yeast) (Candida guilliermondii)                               | 964  |
| 2480 | A6QLT9 | A6QLT9_BOVIN | Eukarya  | AARS                      | Bos taurus (Bovine)                                                                  | 968  |
| 2481 | A6RM66 | A6RM66_BOTFB | Eukarya  | BC1G_01538                | Botryotinia fuckeliana (strain B05.10) (Noble rot fungus) (Botrytis cinerea)         | 952  |
| 2482 | A6ZPG5 | A6ZPG5_YEAS7 | Eukarya  | ALA1_SCY_5380             | Saccharomyces cerevisiae (strain YJM789) (Baker's yeast)                             | 958  |
| 2483 | A7SHU9 | A7SHU9_NEMVE | Eukarya  | v1g189992                 | Nematostella vectensis (Starlet sea anemone)                                         | 961  |
| 2484 | A7TPK2 | A7TPK2_VANPO | Eukarya  | Kpol_1040p7               | Vanderwaltozyma polyspora (strain ATCC 22028 / DSM 70294) (Kluyveromyces polysporus) | 956  |
| 2485 | A7TRK4 | A7TRK4_VANPO | Eukarya  | Kpol_1071p9               | Vanderwaltozyma polyspora (strain ATCC 22028 / DSM 70294) (Kluyveromyces polysporus) | 957  |
| 2486 | A8J462 | A8J462_CHLRE | Eukarya  | CHLREDRAFT_119554         | Chlamydomonas reinhardtii (Chlamydomonas smithii)                                    | 879  |
| 2487 | A8N6S6 | A8N6S6_COPC7 | Eukarya  | CC1G_11540                | Coprinopsis cinerea (strain Okayama-7 / 130 / FGSC 9003) (Inky cap)                  | 968  |
| 2488 | A8Q378 | A8Q378_BRUMA | Eukarya  | Bm1_41830                 | Brugia malayi (Filarial nematode worm)                                               | 962  |
| 2489 | A8XEI6 | A8XEI6_CAEBR | Eukarya  | cbr-aars-2_Cbr-aars-2_CBG | Caenorhabditis briggsae AF16                                                         | 967  |
| 2490 | A9RG15 | A9RG15_PHYPA | Eukarya  | PHYPADRAFT_174459         | Physcomitrella patens subsp. patens (Moss)                                           | 927  |
| 2491 | A9T4K7 | A9T4K7_PHYPA | Eukarya  | PHYPADRAFT_140193         | Physcomitrella patens subsp. patens (Moss)                                           | 937  |
| 2492 | A9URD2 | A9URD2_MONBE | Eukarya  | 14194                     | Monosiga brevicollis (Choanoflagellate)                                              | 1000 |
| 2493 | B0D0A1 | B0D0A1_LACBS | Eukarya  | LACBIDRAFT_183417         | Laccaria bicolor (strain S238N-H82) (Bicoloured deceiver) (Laccaria amethystina)     | 955  |
| 2494 | B0S708 | B0S708_DANRE | Eukarya  | DKEY-151P17.1-001         | Danio rerio (Zebrafish) (Brachydanio rerio)                                          | 988  |
| 2495 | B0S709 | B0S709_DANRE | Eukarya  | DKEY-151P17.1-002         | Danio rerio (Zebrafish) (Brachydanio rerio)                                          | 963  |
| 2496 | B0WGD2 | B0WGD2_CULQU | Eukarya  | CpipJ_CPIJ005916          | Culex quinquefasciatus (Southern house mosquito) (Culex pungens)                     | 967  |
| 2497 | B1WBD3 | B1WBD3_XENLA | Eukarya  | aars LOC100158432         | Xenopus laevis (African clawed frog)                                                 | 968  |

|      |        |              |         |                        |                                                                       |      |
|------|--------|--------------|---------|------------------------|-----------------------------------------------------------------------|------|
| 2498 | B1X4D9 | B1X4D9 PAUCH | Eukarya | alaS PCC_0367          | Paulinella chromatophora                                              | 891  |
| 2499 | B2WCE6 | B2WCE6 PYRTR | Eukarya | PTRG_07655             | Pyrenophora tritici-repentis (strain Pt-1C-BFP) (Wheat tan spot fun   | 966  |
| 2500 | B3LJZ4 | B3LJZ4 YEAS1 | Eukarya | SCRG_01712             | Saccharomyces cerevisiae (strain RM11-1a) (Baker's yeast)             | 958  |
| 2501 | B3MP00 | B3MP00 DROAN | Eukarya | GF14684 Dana\GF14684 D | Drosophila ananassae (Fruit fly)                                      | 966  |
| 2502 | B3N756 | B3N756 DROER | Eukarya | GG23450 Dere\GG23450 D | Drosophila erecta (Fruit fly)                                         | 966  |
| 2503 | B4DR45 | B4DR45 HUMAN | Eukarya | AARS                   | Homo sapiens (Human)                                                  | 992  |
| 2504 | B4GJT1 | B4GJT1 DROPE | Eukarya | GL25810 Dper\GL25810 D | Drosophila persimilis (Fruit fly)                                     | 966  |
| 2505 | B4HYK1 | B4HYK1 DROSE | Eukarya | GM12994 Dsec\GM12994 D | Drosophila sechellia (Fruit fly)                                      | 966  |
| 2506 | B4JEE5 | B4JEE5 DROGR | Eukarya | GH11356 Dgri\GH11356 D | Drosophila grimshawi (Fruit fly) (Idiomyia grimshawi)                 | 967  |
| 2507 | B4KE83 | B4KE83 DROMO | Eukarya | GI12987 Dmoj\GI12987 D | Drosophila mojavensis (Fruit fly)                                     | 967  |
| 2508 | B4M8W1 | B4M8W1 DROVI | Eukarya | GJ18196 Dvir\GJ18196 D | Drosophila virilis (Fruit fly)                                        | 967  |
| 2509 | B4N0Y7 | B4N0Y7 DROWI | Eukarya | GK24844 Dwil\GK24844 D | Drosophila willistoni (Fruit fly)                                     | 967  |
| 2510 | B4NWX7 | B4NWX7 DROYA | Eukarya | GE11031 Dyak\GE11031 D | Drosophila yakuba (Fruit fly)                                         | 966  |
| 2511 | B4Q6S2 | B4Q6S2 DROSI | Eukarya | GD22412 Dsim\GD22412 D | Drosophila simulans (Fruit fly)                                       | 948  |
| 2512 | B5VSL3 | B5VSL3 YEAS6 | Eukarya | AWRI1631_154850        | Saccharomyces cerevisiae (strain AWRI1631) (Baker's yeast)            | 958  |
| 2513 | B5X2C6 | B5X2C6 SALS  | Eukarya | SYAC                   | Salmo salar (Atlantic salmon)                                         | 967  |
| 2514 | B6HVA4 | B6HVA4 PENCW | Eukarya | Pc22g10240             | Penicillium chrysogenum (strain ATCC 28089 / DSM 1075 / Wiscons       | 958  |
| 2515 | B6JYX5 | B6JYX5 SCHJY | Eukarya | SJAG_01797             | Schizosaccharomyces japonicus (strain yFS275 / FY16936) (Fission      | 961  |
| 2516 | B6QMI2 | B6QMI2 PENMQ | Eukarya | PMAA_060490            | Penicillium marneffeii (strain ATCC 18224 / CBS 334.59 / QM 7333)     | 1000 |
| 2517 | B7G7J0 | B7G7J0 PHATC | Eukarya | PHATRDRAFT_15186       | Phaeodactylum tricornutum (strain CCAP 1055/1)                        | 959  |
| 2518 | B8BFZ6 | B8BFZ6 ORYSI | Eukarya | Osi_32912              | Oryza sativa subsp. indica (Rice)                                     | 953  |
| 2519 | B8LD66 | B8LD66 THAPS | Eukarya | ALATS1 THAPSDRAFT_382  | Thalassiosira pseudonana CCMP1335                                     | 933  |
| 2520 | B8MHK7 | B8MHK7 TALS  | Eukarya | TSTA_011040            | Talaromyces stipitatus (strain ATCC 10500 / CBS 375.48 / QM 6759      | 1002 |
| 2521 | B9SYR5 | B9SYR5 RICCO | Eukarya | RCOM_0036070           | Ricinus communis (Castor bean)                                        | 1025 |
| 2522 | B9WJ73 | B9WJ73 CANDC | Eukarya | ALA1_CD36_64230        | Candida dubliniensis (strain CD36 / CBS 7987 / NCPF 3949 / NRRL       | 969  |
| 2523 | C0S7L6 | C0S7L6 PARBP | Eukarya | PABG_03816             | Paracoccidioides brasiliensis (strain Pb03)                           | 962  |
| 2524 | C1E0L4 | C1E0L4 MICS  | Eukarya | MICPUN_79369           | Micromonas sp. (strain RCC299 / NOUM17) (Picoplanktonic green a       | 923  |
| 2525 | C1FZG2 | C1FZG2 PARBD | Eukarya | PADG_00002             | Paracoccidioides brasiliensis (strain Pb18)                           | 962  |
| 2526 | C1GTD2 | C1GTD2 PARBA | Eukarya | PAAG_01777             | Paracoccidioides brasiliensis (strain ATCC MYA-826 / Pb01)            | 962  |
| 2527 | C4Q7I0 | C4Q7I0 SCHMA | Eukarya | Smp_038240             | Schistosoma mansoni (Blood fluke)                                     | 980  |
| 2528 | C4R4M5 | C4R4M5 PICPG | Eukarya | PAS_chr3_0462          | Pichia pastoris (strain GS115) (Yeast)                                | 981  |
| 2529 | C4Y8W6 | C4Y8W6 CLAL4 | Eukarya | CLUG_04644             | Clavospora lusitaniae (strain ATCC 42720) (Yeast) (Candida lusitaniae | 964  |
| 2530 | C4YSD8 | C4YSD8 CANAW | Eukarya | CAWG_05001             | Candida albicans (strain WO-1) (Yeast)                                | 969  |
| 2531 | C5DG24 | C5DG24 LACTC | Eukarya | KLTH0D01848g           | Lachancea thermotolerans (strain CBS 6340) (Yeast) (Kluyveromyc       | 955  |
| 2532 | C5DV71 | C5DV71 ZYGR  | Eukarya | ZYROOD004378g          | Zygosaccharomyces rouxii (strain ATCC 2623 / CBS 732 / IFO 1130       | 956  |
| 2533 | C5FX97 | C5FX97 NANOT | Eukarya | MCYG_07756             | Nannizzia otiae (strain CBS 113480) (Microsporium canis) (Arthrode    | 963  |
| 2534 | C5GV97 | C5GV97 AJEDR | Eukarya | BDCG_08527             | Ajellomyces dermatitidis (strain ER-3) (Blastomyces dermatitidis)     | 962  |
| 2535 | C5JCH2 | C5JCH2 AJEDS | Eukarya | BDBG_00156             | Ajellomyces dermatitidis (strain SLH14081) (Blastomyces dermatiti     | 962  |
| 2536 | C5P2Y5 | C5P2Y5 COCP7 | Eukarya | CPC735_039370          | Coccidioides posadasii (strain C735) (Valley fever fungus)            | 1023 |
| 2537 | C5YTZ0 | C5YTZ0 SORBI | Eukarya | Sb08g008230 SORBIDRAF  | Sorghum bicolor (Sorghum) (Sorghum vulgare)                           | 1006 |
| 2538 | C6HAV6 | C6HAV6 AJECH | Eukarya | HCDG_03838             | Ajellomyces capsulata (strain H143) (Darling's disease fungus) (His   | 961  |
| 2539 | C7GNT1 | C7GNT1 YEAS2 | Eukarya | ALA1_C1Q_01924         | Saccharomyces cerevisiae (strain JAY291) (Baker's yeast)              | 958  |
| 2540 | C7YI88 | C7YI88 NECH7 | Eukarya | NECHADRAFT_90315       | Nectria haematococca (strain 77-13-4 / FGSC 9596 / MPVI) (Fusari      | 956  |
| 2541 | C8ZH87 | C8ZH87 YEAS8 | Eukarya | EC1118_104_5787g       | Saccharomyces cerevisiae (strain Lalvin EC1118 / Prise de mousse)     | 958  |
| 2542 | D0N2D2 | D0N2D2 PHYIN | Eukarya | PITG_04918             | Phytophthora infestans T30-4                                          | 897  |
| 2543 | D0NJY9 | D0NJY9 PHYIN | Eukarya | PITG_12961             | Phytophthora infestans T30-4                                          | 980  |
| 2544 | D1ZN82 | D1ZN82 SORMK | Eukarya | SMAC_05794             | Sordaria macrospora (strain ATCC MYA-333 / DSM 997 / K(L3346)         | 961  |
| 2545 | D2I6M4 | D2I6M4 AILME | Eukarya | PANDA_021488           | Ailuropoda melanoleuca (Giant panda)                                  | 976  |
| 2546 | D4AQA4 | D4AQA4 ARTBC | Eukarya | ARB_06411              | Arthroderma benhamiae (strain CBS 112371) (Trichophyton menta         | 954  |
| 2547 | D5GHQ8 | D5GHQ8_9PEZI | Eukarya | GSTUM_00007997001      | Tuber melanosporum (Perigord truffle)                                 | 959  |
| 2548 | D6WJA8 | D6WJA8 TRICA | Eukarya | TcasGA2_TC013061       | Tribolium castaneum (Red flour beetle)                                | 965  |
| 2549 | D7KFW7 | D7KFW7 ARALY | Eukarya | ARALYDRAFT_474152      | Arabidopsis lyrata subsp. lyrata                                      | 955  |
| 2550 | D7M1J4 | D7M1J4 ARALY | Eukarya | ARALYDRAFT_910279      | Arabidopsis lyrata subsp. lyrata                                      | 978  |
| 2551 | D7T7J0 | D7T7J0 VITVI | Eukarya | VIT_00024320001        | Vitis vinifera (Grape)                                                | 960  |
| 2552 | D7T9F5 | D7T9F5 VITVI | Eukarya | VIT_00012030001        | Vitis vinifera (Grape)                                                | 1026 |
| 2553 | D7U4W0 | D7U4W0 VITVI | Eukarya | VIT_00023918001        | Vitis vinifera (Grape)                                                | 1006 |
| 2554 | D8LCV6 | D8LCV6 ECTSI | Eukarya | ALARS_Esi_0111_0055    | Ectocarpus siliculosus (Brown alga)                                   | 1122 |
| 2555 | D8M1P4 | D8M1P4 BLAHO | Eukarya | GSBLH_T00002066001     | Blastocystis hominis                                                  | 935  |
| 2556 | D8Q8F8 | D8Q8F8 SCHCM | Eukarya | SCHCODRAFT_82606       | Schizophyllum commune (strain H4-8 / FGSC 9210) (Split gill fungi     | 949  |
| 2557 | D8SHA2 | D8SHA2 SELML | Eukarya | SELMODRAFT_116848      | Selaginella moellendorffii (Spikemoss)                                | 934  |
| 2558 | D8TCM1 | D8TCM1 SELML | Eukarya | SELMODRAFT_136926      | Selaginella moellendorffii (Spikemoss)                                | 920  |
| 2559 | D8TQJ5 | D8TQJ5 VOLCA | Eukarya | VOLCADRAFT_89008       | Volvox carteri f. nagariensis                                         | 980  |
| 2560 | D8TVU1 | D8TVU1 VOLCA | Eukarya | VOLCADRAFT_120886      | Volvox carteri f. nagariensis                                         | 1143 |
| 2561 | E0VL09 | E0VL09 PEDHC | Eukarya | Phum_PHUM278150        | Pediculus humanus subsp. corporis (Body louse)                        | 983  |
| 2562 | E1FMK3 | E1FMK3 LOALO | Eukarya | LOAG_01219             | Loa loa (Eye worm)                                                    | 967  |
| 2563 | E2A1R5 | E2A1R5 9HYME | Eukarya | EAG_06924              | Camponotus floridanus                                                 | 968  |
| 2564 | E2BBY0 | E2BBY0 9HYME | Eukarya | EAI_01167              | Harpegnathos saltator                                                 | 972  |
| 2565 | Q0D226 | Q0D226 ASPTN | Eukarya | ATEG_00008             | Aspergillus terreus (strain NIH 2624 / FGSC A1156)                    | 968  |
| 2566 | Q0UU60 | Q0UU60 PHANO | Eukarya | SNOG_04704             | Phaeosphaeria nodorum (Glume blotch fungus) (Septoria nodorum)        | 960  |
| 2567 | Q10A14 | Q10A14 ORYSJ | Eukarya | Os10g0182000 LOC_Os10g | Oryza sativa subsp. japonica (Rice)                                   | 999  |
| 2568 | Q17LY0 | Q17LY0 AEDAE | Eukarya | AAEL001218 AaeL_AAEL00 | Aedes aegypti (Yellowfever mosquito) (Culex aegypti)                  | 966  |
| 2569 | Q1LVL2 | Q1LVL2 DANRE | Eukarya | aars_CH211-22301.6-001 | Danio rerio (Zebrafish) (Brachydanio rerio)                           | 966  |
| 2570 | Q1LVL3 | Q1LVL3 DANRE | Eukarya | aars_CH211-22301.6-002 | Danio rerio (Zebrafish) (Brachydanio rerio)                           | 991  |
| 2571 | Q29NZ1 | Q29NZ1 DROPS | Eukarya | GA12250 Dpse\GA12250 D | Drosophila pseudoobscura pseudoobscura (Fruit fly)                    | 966  |
| 2572 | Q3T232 | Q3T232 MOUSE | Eukarya | Aars                   | Mus musculus (Mouse)                                                  | 968  |
| 2573 | Q3UD67 | Q3UD67 MOUSE | Eukarya | Aars                   | Mus musculus (Mouse)                                                  | 968  |
| 2574 | Q4P3T0 | Q4P3T0 USTMA | Eukarya | UM05233.1              | Ustilago maydis (Smut fungus)                                         | 990  |

|      |        |              |         |                      |                                                      |      |
|------|--------|--------------|---------|----------------------|------------------------------------------------------|------|
| 2575 | Q5ZKF3 | Q5ZKF3_CHICK | Eukarya | RCJMB04_11d4         | Gallus gallus (Chicken)                              | 913  |
| 2576 | Q6BZ68 | Q6BZ68_DEBHA | Eukarya | DEHA2A03652g         | Debaryomyces hansenii (Yeast) (Torulaspora hansenii) | 1021 |
| 2577 | Q6CFS9 | Q6CFS9_YARLI | Eukarya | YALI0B04180g         | Yarrowia lipolytica (Candida lipolytica)             | 960  |
| 2578 | Q6CLJ9 | Q6CLJ9_KLULA | Eukarya | KLLA0F02431g         | Kluyveromyces lactis (Yeast) (Candida sphaerica)     | 956  |
| 2579 | Q6FV21 | Q6FV21_CANGA | Eukarya | CAGL0E05390g         | Candida glabrata (Yeast) (Torulopsis glabrata)       | 956  |
| 2580 | Q6XMP4 | Q6XMP4_MOUSE | Eukarya | Aars                 | Mus musculus (Mouse)                                 | 968  |
| 2581 | Q759B4 | Q759B4_ASHGS | Eukarya | ADR363C_AGOS_ADR363C | Ashbya gossypii (Yeast) (Eremothecium gossypii)      | 956  |
| 2582 | Q7Q1N8 | Q7Q1N8_ANOGA | Eukarya | AGAP009701           | Anopheles gambiae (African malaria mosquito)         | 946  |
| 2583 | Q7SHP9 | Q7SHP9_NEUCR | Eukarya | B5K2.190_NCU02566    | Neurospora crassa                                    | 961  |
